# Supplementary material
Source: PubMed Central journal article supplement (PMC3164113)
Supplement: NIHMS63012-supplement-1si20051125_06.pdf [file NIHMS63012-supplement-1si20051125_06.pdf]

**Supporting Information:**  
**Pipecolic Acid-Catalyzed Asymmetric Mannich Reactions**

Paul Ha-Yeon Cheong,<sup>†</sup> Haile Zhang,<sup>§</sup> Rajee Thayumanavan,<sup>§</sup> Fujie Tanaka,<sup>§</sup> K. N. Houk,<sup>\*†</sup> and Carlos F. Barbas III,<sup>\*§</sup>

*Department of Chemistry and Biochemistry, University of California, Los Angeles, California 90095-1569, USA, and The Skaggs Institute for Chemical Biology and the Departments of Chemistry and Molecular Biology, The Scripps Research Institute, 10550 North Torrey Pines Road, La Jolla, California 92037, USA*

**I. Experimental**

**General procedure for the pipecolic acid catalyzed asymmetric Mannich-type reaction between *N*-PMP protected  $\alpha$ -imino ethyl glyoxylate and aldehyde donors:**

*N*-PMP-protected  $\alpha$ -imino ethyl glyoxylate (0.5 mmol) was dissolved in anhydrous DMSO (5 mL) and the corresponding aldehyde donor (1.0 mmol) was added, followed by L-pipecolic acid (0.15 mmol). After stirring for overnight (6-14 h) at room temperature, the mixture was worked up by addition of saturated ammonium chloride solution and extraction with ethyl acetate (three or four times). The combined organic layers were washed with brine, dried with MgSO<sub>4</sub>, filtered, and concentrated, and purified by flash column chromatography (10-20% EtOAc/hexanes) to afford the corresponding Mannich addition product. The enantiomeric excesses of all products were determined by chiral-phase HPLC analyses.

**Ethyl 3-formyl-2-(*p*-methoxyphenylamino)butanoate (1a + 2a):** data were described previously.<sup>S1</sup>

**Ethyl 3-formyl-2-(*p*-methoxyphenylamino)-4-methyl-pentanoate (1b + 2b):** <sup>1</sup>H NMR (500 MHz, CDCl<sub>3</sub>): purified 1:1 mixture of diastereomers, \* denotes *anti*-diastereomer (**2b**),  $\delta$  = 1.03 (d, 3H x 1/2, *J* = 6.6 Hz, CHCH<sub>3</sub>), 1.08 (d, 3H\* x 1/2, *J* = 7

---

<sup>†</sup> University of California, Los Angeles  
<sup>§</sup> The Scripps Research Institute

(S1) Cordova, A.; Watanabe, S.; Tanaka, F.; Notz, W.; Barbas, C. F., III *J. Am. Chem. Soc.* **2002**, *124*, 1866.

## Supporting Information

Hz, OCHCH<sub>3</sub>), 1.12 (d, 3H\* x 1/2, *J* = 7 Hz, CHCH<sub>3</sub>), 1.16 (d, 3H x 1/2, *J* = 6.6 Hz, CHCH<sub>3</sub>), 1.22 (t, 3H, OCH<sub>2</sub>CH<sub>3</sub>), 2.13 (m, 1H\* x 1/2, CH(CH<sub>3</sub>)<sub>2</sub>), 2.34 (m, 1H x 1/2, CH(CH<sub>3</sub>)<sub>2</sub>), 2.54-2.61 (m, 1H, CHCHO), 3.74 (s, 3H, OCH<sub>3</sub>), 3.93-3.87 (1H, NH), 4.17-4.12 (m, 2H, OCH<sub>2</sub>CH<sub>3</sub>), 4.35-4.31 (m, 1H, CHNHPMP), 6.64 (m, 2H, ArH), 6.78 (m, 2H, ArH), 9.75 (d, 1H\* x 1/2, *J* = 3.5 Hz, CHCHO), 9.78 (d, 1H x 1/2, *J* = 3.0 Hz, CHCHO); <sup>13</sup>C NMR (125 MHz, CDCl<sub>3</sub>): mixture of diastereomers, δ = 203.6, 203.2, 172.8, 172.6, 153.3, 153.1, 140.4, 140.1, 115.9, 114.8, 114.7, 61.4, 59.6, 59.5, 57.2, 57.0, 55.6, 27.5, 26.3, 21.2, 20.9, 19.8, 19.2, 14.1; HPLC (Daicel Chiralcel AS-H, hexane /*i*-PrOH = 99:1, 1.0 mL/min, λ = 254 nm) t<sub>R</sub> (*syn* major enantiomer, (2*S*,3*S*)-**1b**) = 30.3 min; t<sub>R</sub> (*syn* minor enantiomer, (2*R*,3*R*) **1b**) = 57.1 min; t<sub>R</sub> (*anti* major enantiomer, (2*S*,3*R*)-**2b**) = 23.1 min; t<sub>R</sub> (*anti* minor enantiomer, (2*R*,3*S*)-**2b**) = 51.1 min. HRMS: calcd for C<sub>16</sub>H<sub>23</sub>NO<sub>4</sub> (MNa<sup>+</sup>) 316.1519, found: 316.1521.

**Ethyl 3-formyl-2-(*p*-methoxyphenylamino)heptanoate (1c + 2c):** <sup>1</sup>H NMR (300 MHz, CDCl<sub>3</sub>): purified 1.5:1 mixture of diastereomers, \* denotes *anti*-diastereomer (**2c**), δ = 0.89-1.02 (m, 3H), 1.23 (t, 3H\* x 2/5, *J* = 7.1 Hz), 1.24 (t, 3H x 3/5, *J* = 7.1 Hz), 1.28-1.90 (m, 6H), 2.68-2.78 (m, 1H), 3.73 (s, 3H), 3.89 (brd, 1H x 3/5, *J* = 10.2 Hz), 4.03 (brd, 1H\* x 2/5, *J* = 10.2 Hz), 4.18 (m, 2H), 4.26 (m, 1H\* x 2/5), 4.35 (dd, 1H x 3/5, *J* = 5.0 Hz, 10.2 Hz), 6.65 (d, 2H, *J* = 8.1 Hz), 6.77 (d, 2H, *J* = 8.1 Hz), 9.65 (d, 1H\* x 2/5, *J* = 2.4 Hz), 9.71 (d, 1H x 3/5, *J* = 2.1 Hz); <sup>13</sup>C NMR (75 MHz, CDCl<sub>3</sub>): δ = 202.9, 202.8, 172.4, 172.2, 153.3, 153.1, 140.4, 140.3, 116.1, 115.7, 114.8, 114.8, 61.5, 61.5, 58.4, 58.1, 55.6, 53.9, 53.7, 29.6, 29.4, 25.4, 24.8, 22.6, 14.1, 13.8 (for <sup>13</sup>C NMR hard copy, see ref S1); HPLC (Daicel Chiralpak AS-H, hexane/*i*-PrOH = 99:1, flow rate 1.0 mL/min, λ = 254 nm); t<sub>R</sub> (*syn* major enantiomer, (2*S*,3*S*)-**1c**) = 35.3 min; t<sub>R</sub> (*syn* minor enantiomer, (2*R*,3*R*)-**1c**) = 54.2 min; t<sub>R</sub> (*anti* major enantiomer, (2*S*,3*R*)-**2c**) = 27.4 min; t<sub>R</sub> (*anti* minor enantiomer, (2*R*,3*S*)-**2c**) = 32.8 min. HRMS: Calcd for C<sub>17</sub>H<sub>25</sub>NO<sub>4</sub> (MNa<sup>+</sup>): 307.1778, found: 307.1781.

**Ethyl 3-formyl-2-(*p*-methoxyphenylamino)octanoate (1d + 2d):** <sup>1</sup>H NMR (500 MHz, CDCl<sub>3</sub>): purified 1.5:1 mixture of diastereomers, \* denotes *anti*-diastereomer (**2d**), δ = 0.89 (m, 3H), 1.24 (t, 3H, *J* = 7.1 Hz), 1.25-1.90 (m, 8H), 2.76 (m, 1H), 3.73 (s, 3H), 3.95-4.10 (1H), 4.14-4.20 (m, 2H), 4.26 (m, 1H\* x 2/5), 4.37 (m, 1H x 3/5), 6.65 (m, 2H), 6.78 (m, 2H), 9.65 (d, 1H\* x 2/5, *J* = 2.0 Hz), 9.71 (d, 1H x 3/5, *J* = 1.5 Hz); <sup>13</sup>C

## Supporting Information

NMR (120 MHz, CDCl<sub>3</sub>):  $\delta$  = 202.6, 202.2, 172.2, 153.3, 153.1, 140.5, 140.3, 116.0, 115.7, 114.8, 61.5, 58.4, 58.1, 57.2, 55.6, 53.9, 53.7, 31.6, 27.1 26.9, 25.6, 22.5, 22.3, 14.1, 13.9; HPLC (Daicel Chairalcel AS-H, hexane/*i*-PrOH =99:1, 1.0 mL/min,  $\lambda$  = 254 nm)  $t_R$  (*syn* major enantiomer, (2*S*,3*S*)-**1d**) = 24.9 min;  $t_R$  (*syn* minor enantiomer, (2*R*,3*R*)-**1d**) = 34.8 min;  $t_R$  (*anti* major enantiomer, (2*S*,3*R*)-**2d**) = 21.1 min;  $t_R$  (*anti* minor enantiomer (2*R*,3*S*)-**2d**) = 23.2 min. HRMS: Calcd for C<sub>18</sub>H<sub>27</sub>NO<sub>4</sub>(MH<sup>+</sup>) 322.2013, found: 322.2021.

**Ethyl 3-formyl-2-(*p*-methoxyphenylamino)hex-5-enoate (1e + 2e):** <sup>1</sup>H NMR (400 MHz, CDCl<sub>3</sub>): 1.6:1 mixture of diastereomers, \* denotes *anti*-diastereomer (**2e**),  $\delta$  = 1.23 (t, 3H\* x 5/13,  $J$  = 7.2 Hz, OCHCH<sub>3</sub>), 1.24 (t, 3H x 8/13,  $J$  = 7.2 Hz, OCHCH<sub>3</sub>), 2.42-2.70 (m, 2H, CH<sub>2</sub>CH=CH<sub>2</sub>), 2.86-2.88 (m, 1H x 8/13, CHCHO), 2.96-2.97(m, 1H\* x 5/13, CHCHO), 3.73 (s, 3H, OCH<sub>3</sub>), 4.00 (d, 1H x 8/13,  $J$  = 9.6Hz, NH), 4.07 (d, 1H\* x 5/13,  $J$  = 9.6Hz, NH), 4.15-4.20 (m, 2H, OCH<sub>2</sub>CH<sub>3</sub>), 4.26-4.30 (m, 1H\* x 5/13, CHNHPMP), 4.36-4.39 (m, 1H x 8/13, CHNHPMP), 5.13-5.19 (m, 2H, CH=CH<sub>2</sub>), 5.77-5.88 (m, 1H, CH=CH<sub>2</sub>), 6.64-6.78 (m, 4H, ArH), 9.68 (d, 1H\* x 5/13,  $J$  = 1.6 Hz, CHCHO), 9.72 (d, 1H x 8/13,  $J$  = 1.2 Hz, CHCHO); <sup>13</sup>C NMR (100 MHz, CDCl<sub>3</sub>): 201.9, 172.2, 172.2, 153.3, 153.1, 140.5, 140.3, 134.3, 118.2, 116.1, 115.8, 114.8, 61.6, 57.8, 57.7, 55.6, 53.1, 53.0, 30.0, 29.7, 14.1. HPLC (Daicel Chairalcel AS-H, hexane /*i*-PrOH =99:1, 1.0 mL/min,  $\lambda$  = 254 nm)  $t_R$  (*syn* major enantiomer, (2*S*,3*S*)-**1e**) = 45.5 min;  $t_R$  (*syn* minor enantiomer, (2*R*,3*R*)-**1e**) = 80.1 min;  $t_R$  (*anti* major enantiomer (2*S*,3*R*)-**2e**) = 33.9 min;  $t_R$  (*anti* minor enantiomer (2*R*,3*S*)-**2e**) = 42.7 min. HRMS: Calcd for C<sub>16</sub>H<sub>22</sub>NO<sub>4</sub>(MH<sup>+</sup>) 292.1543, found: 292.1537.

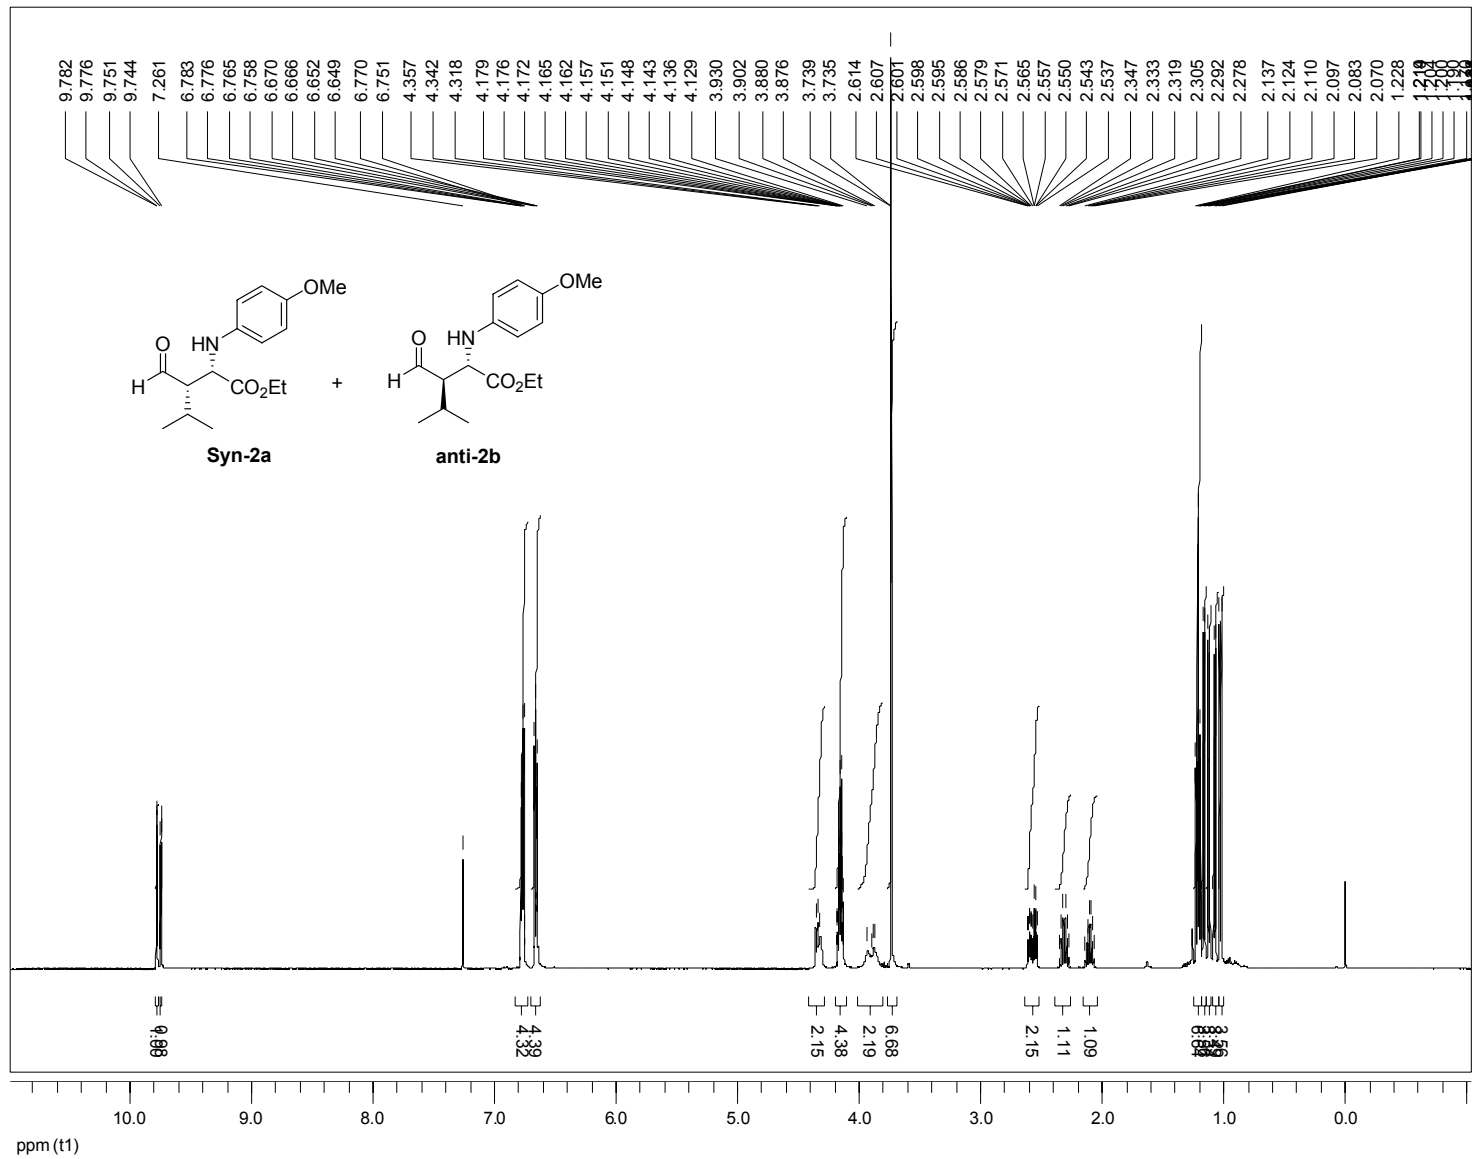

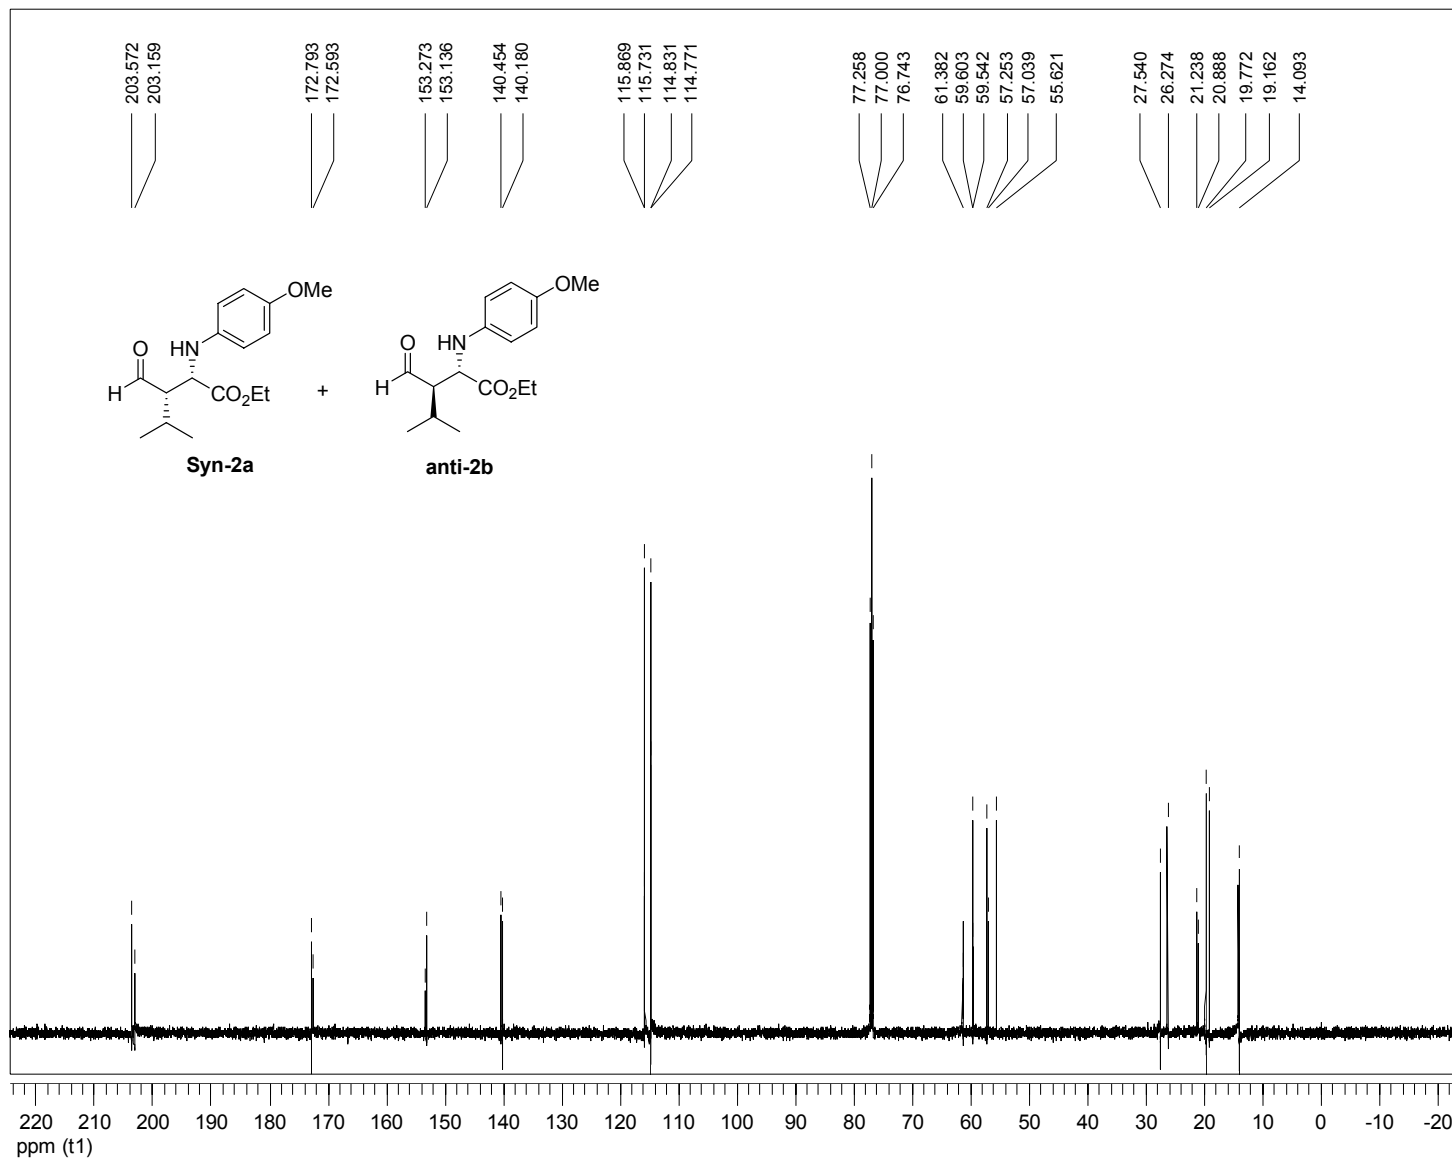

**Date:**

15 Aug 2005

**Document's Title:**

ZHL-1076forOL.mrc

**Spectrum Title:**

ZHL-1076sec\_20Jun2005

**Frequency (MHz):**

(f1) 300.143

**Original Points Count:**

(f1) 7197

**Actual Points Count:**

(f1) 8192

**Acquisition Time (sec):**

(f1) 1.9979

**Spectral Width (ppm):**

(f1) 12.002

**Pulse Program:**

Unknown

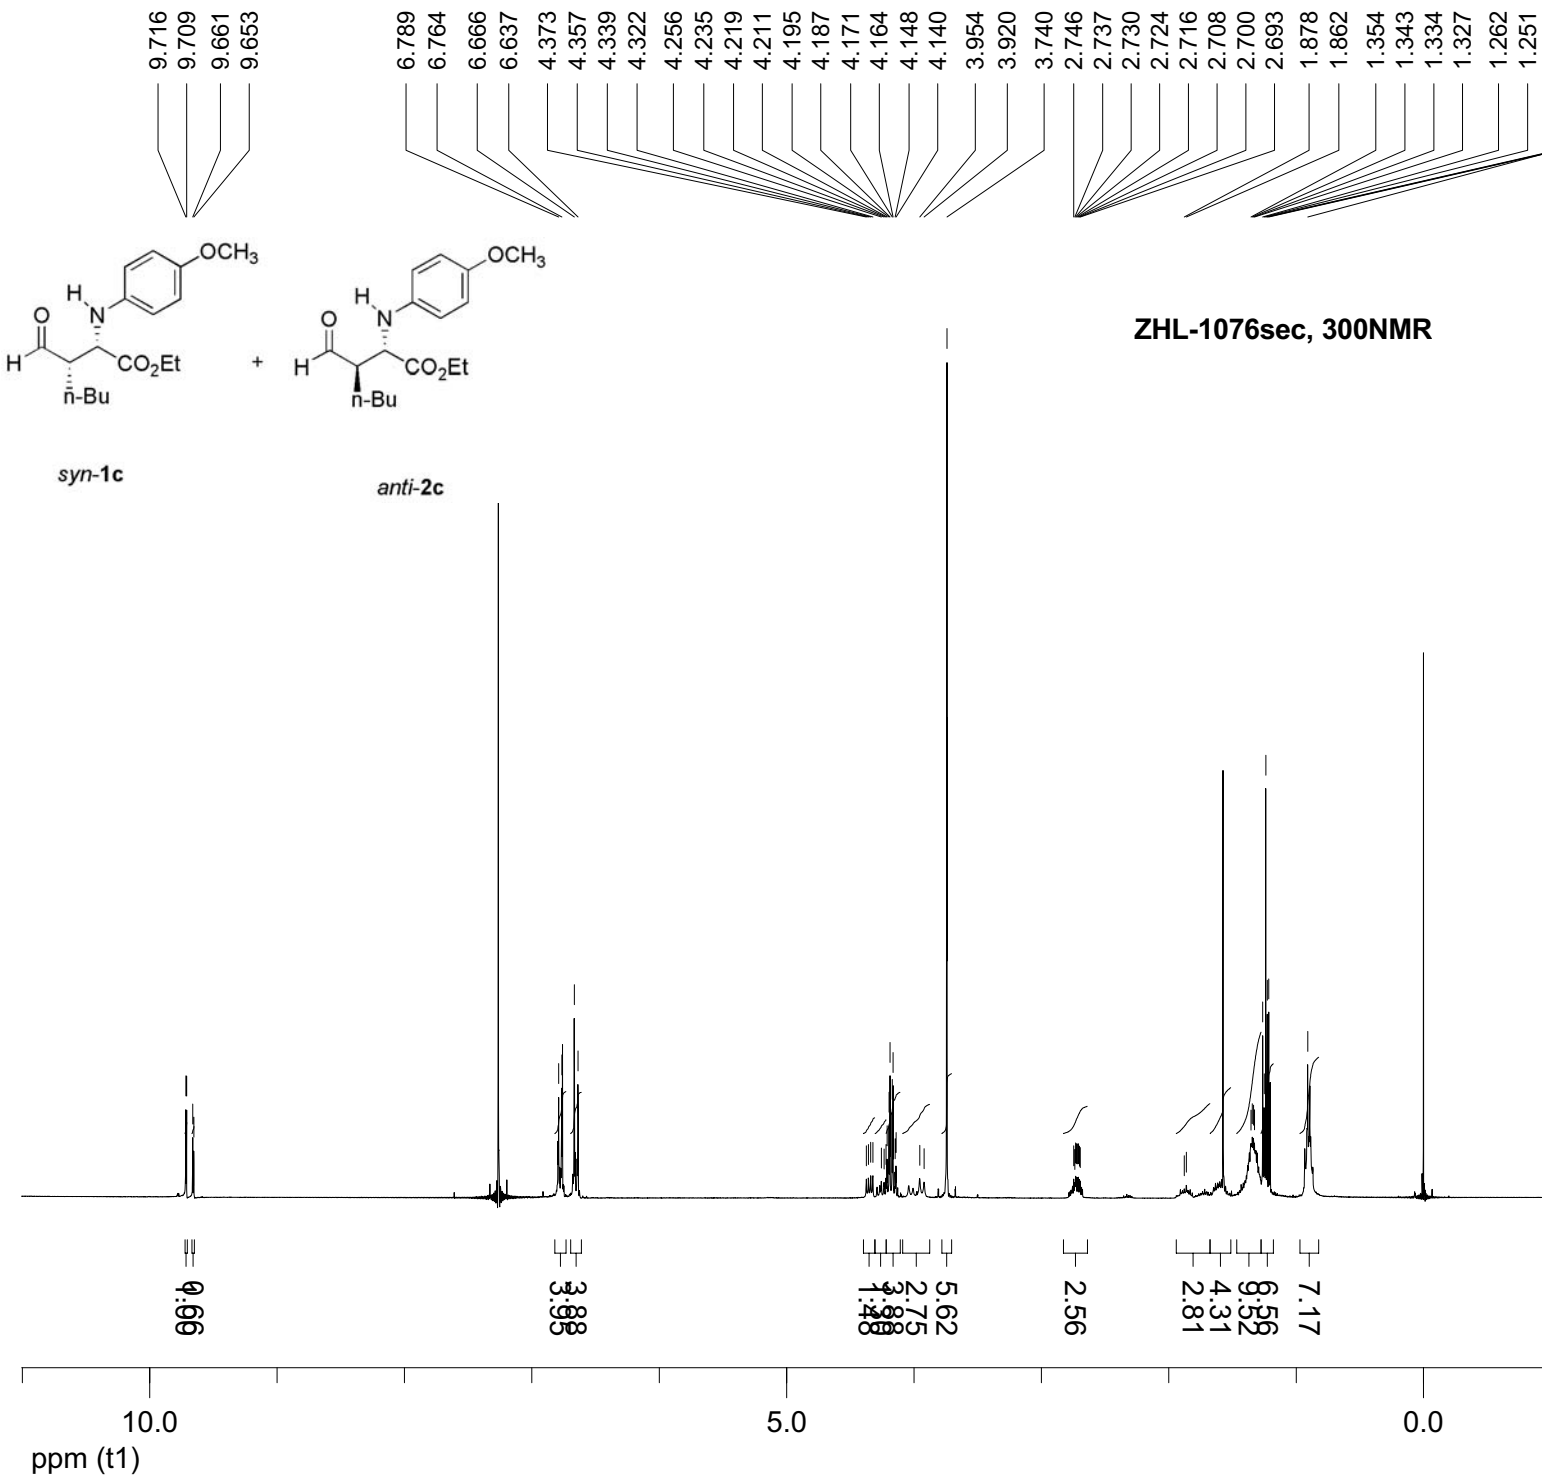

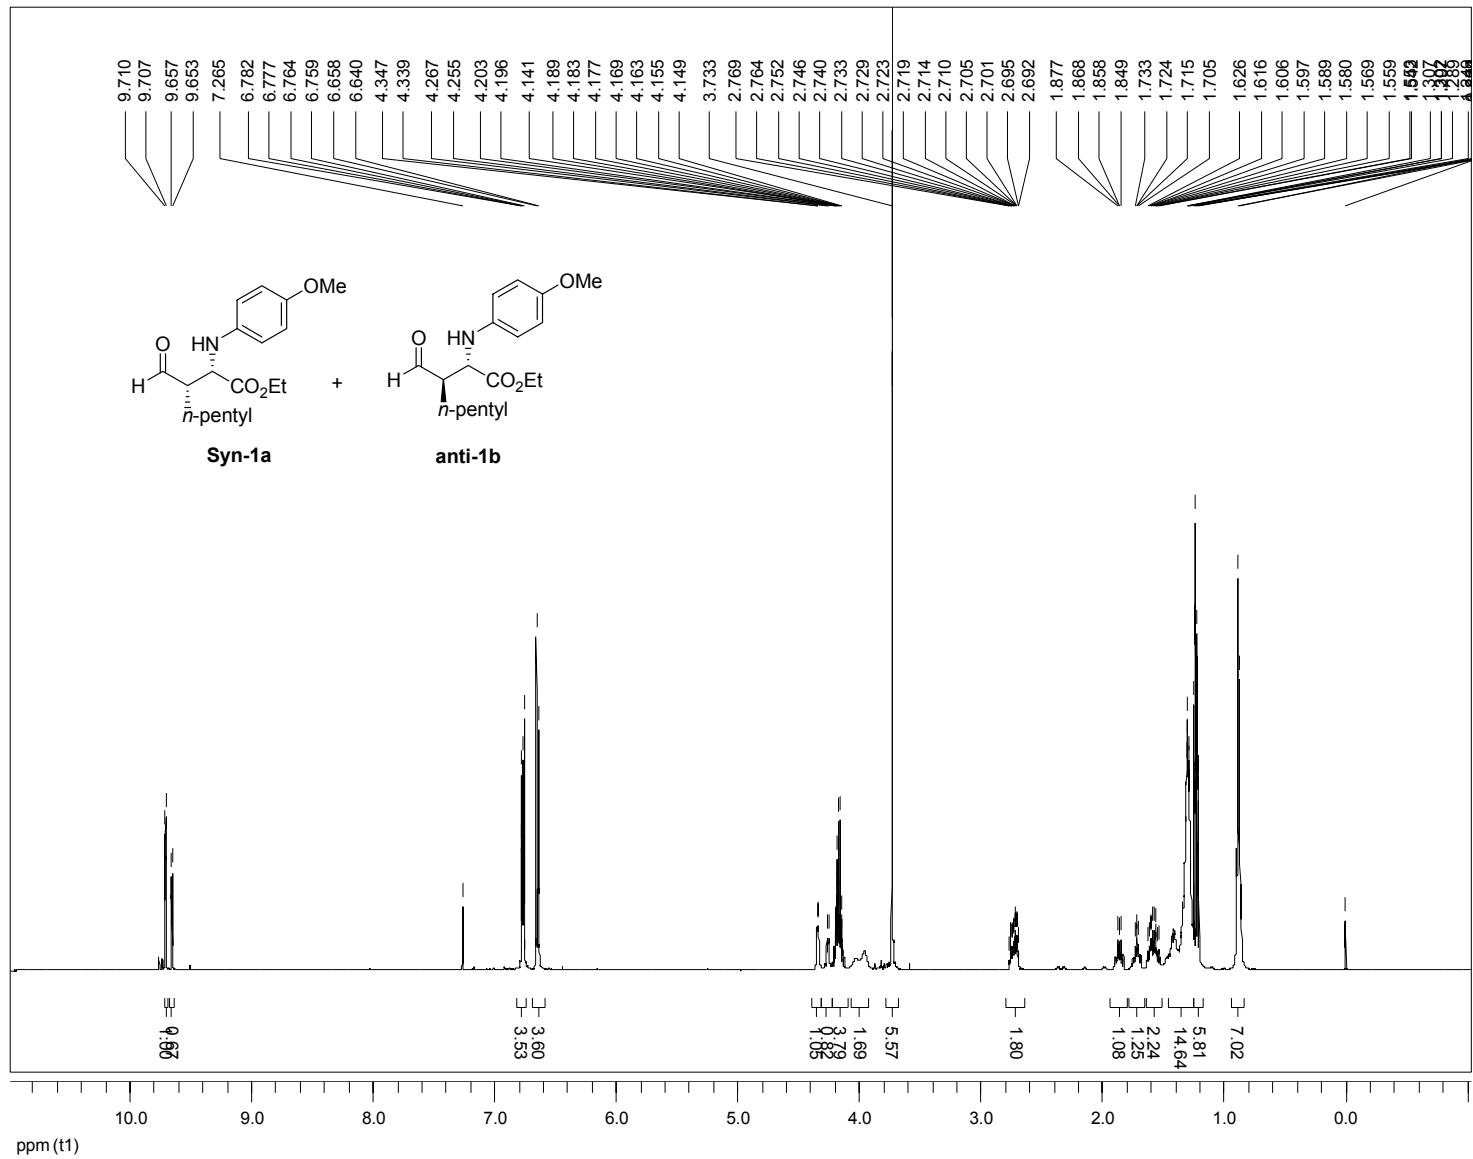

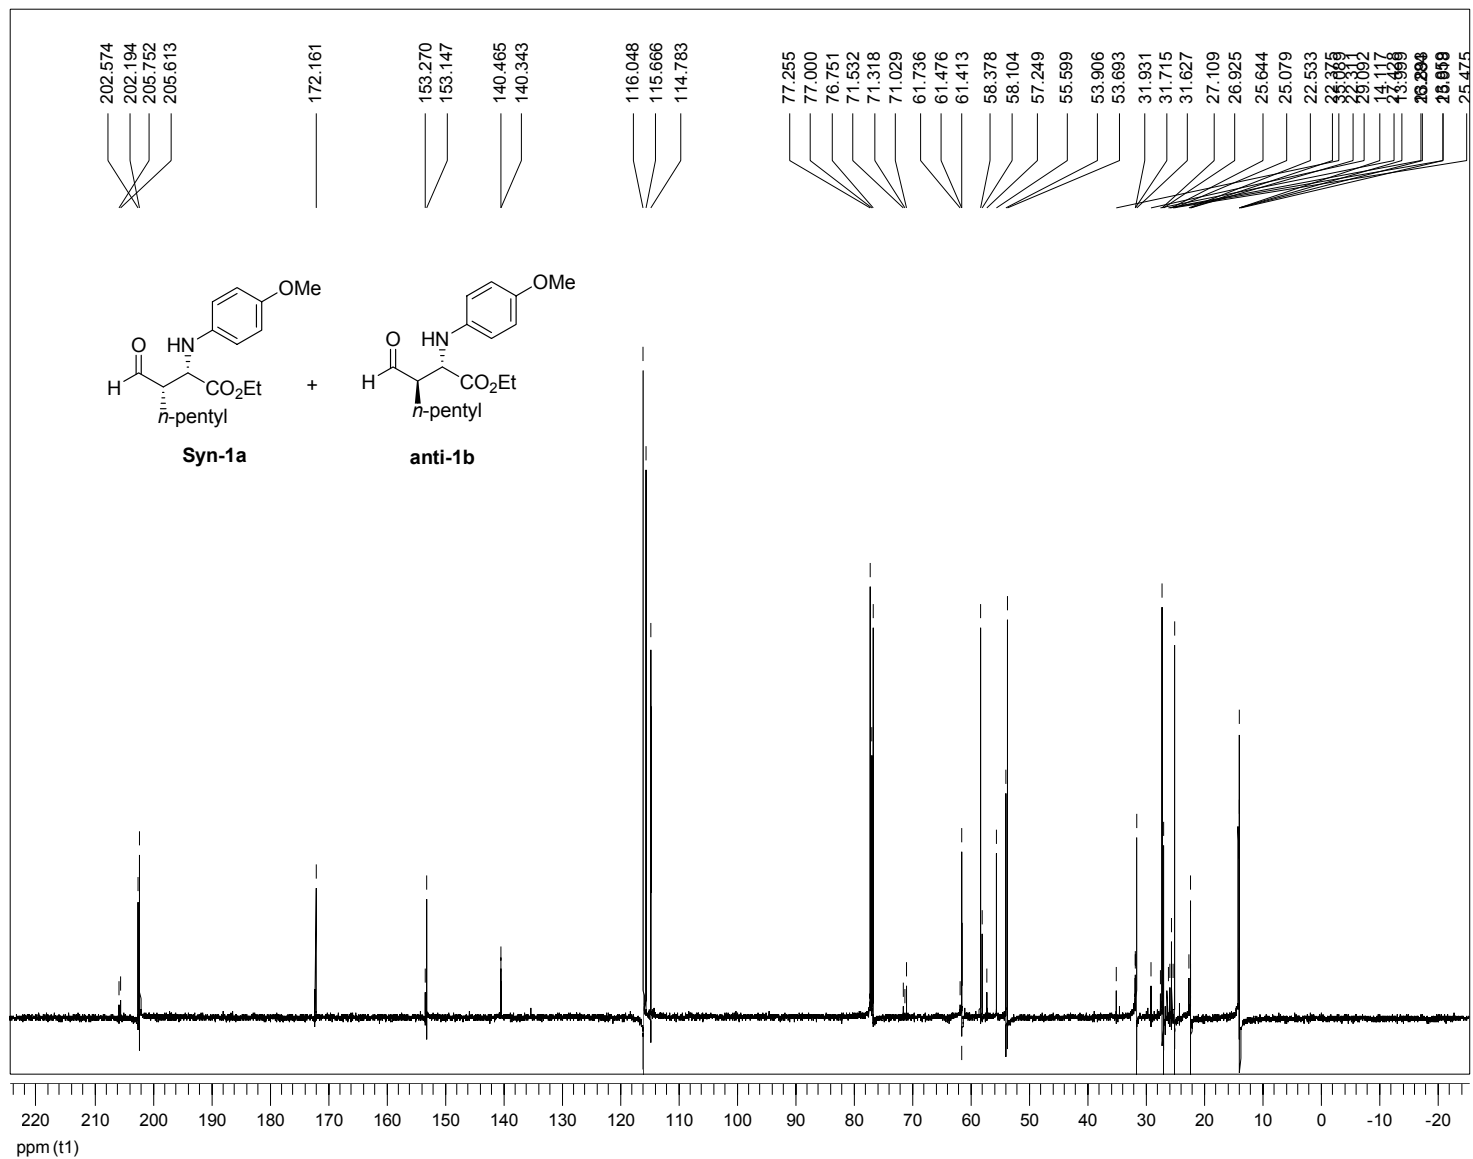



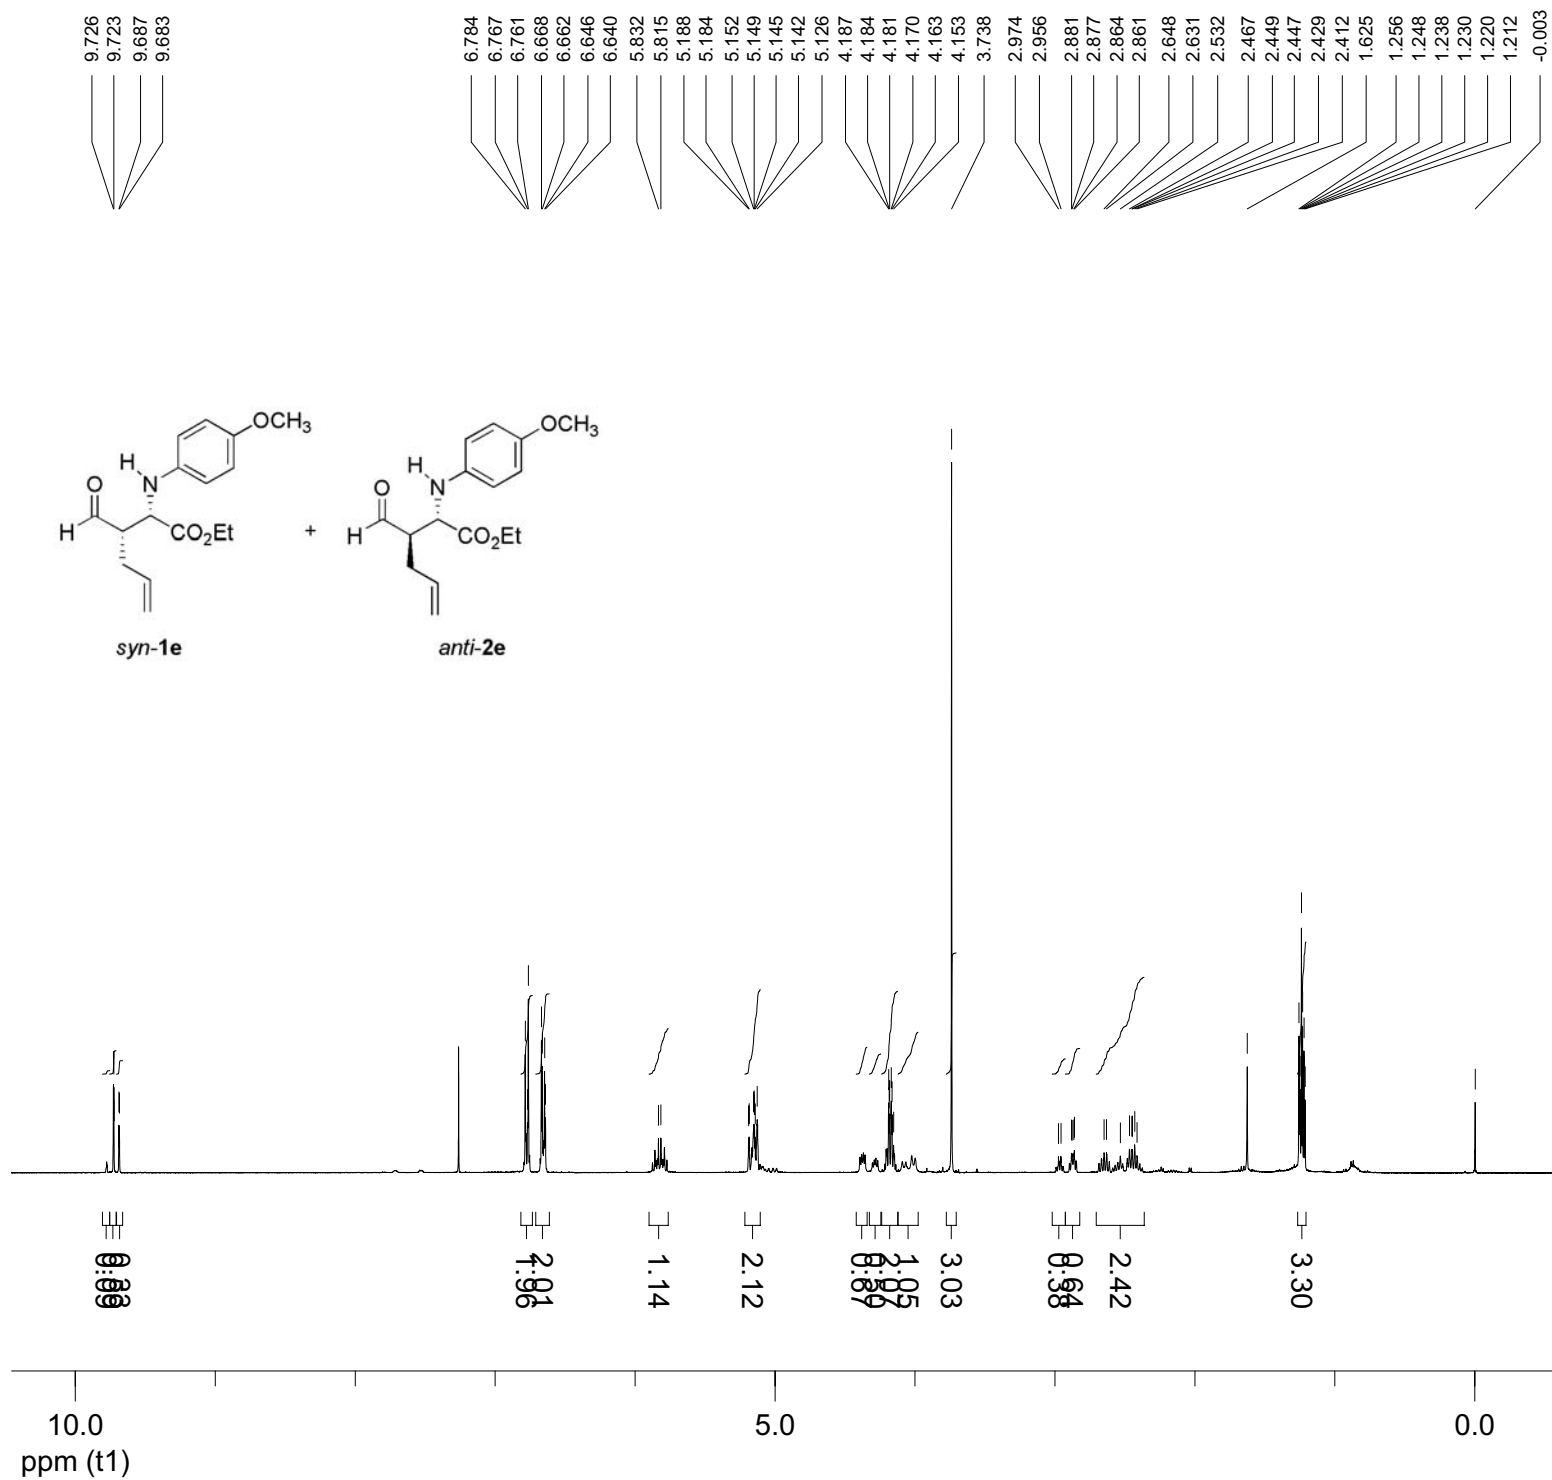**Date:**

15 Aug 2005

**Document's Title:**

ZHL-1121-b2-b3.mrc

**Spectrum Title:**

ZHL-1121-b2-3\_15Jul2005

**Frequency (MHz):**

(f1) 399.739

**Original Points Count:**

(f1) 23946

**Actual Points Count:**

(f1) 32768

**Acquisition Time (sec):**

(f1) 3.7440

**Spectral Width (ppm):**

(f1) 16.000

**Pulse Program:**

Unknown

**Temperature:**

29

**Number of Scans:**

8

**Acq. Date:**

Jul 15 2005

**Date:**  
15 Aug 2005  
**Document's Title:**  
parameterZHL-1121-b4-b7car.mrc

**Spectrum Title:**  
ZHL-1121-b4-b7car\_16Jul2005

**Frequency (MHz):**  
(f1) 100.525  
**Original Points Count:**  
(f1) 30135  
**Actual Points Count:**  
(f1) 32768  
**Acquisition Time (sec):**  
(f1) 1.1994  
**Spectral Width (ppm):**  
(f1) 249.945  
**Pulse Program:**  
Unknown  
**Temperature:**  
29

**Number of Scans:**  
512

**Acq. Date:**  
Jul 16 2005

SI [10/37]

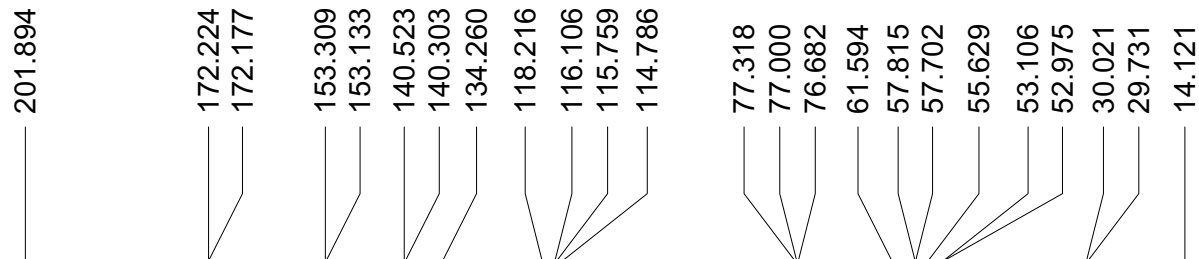

**400 CNMR, ZHL-1121-b4-b7-car**

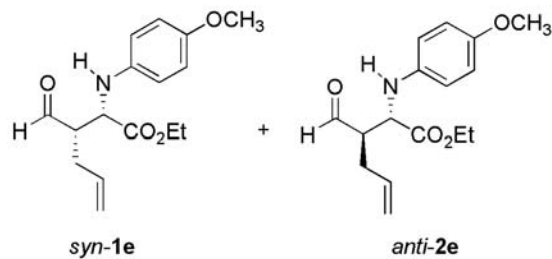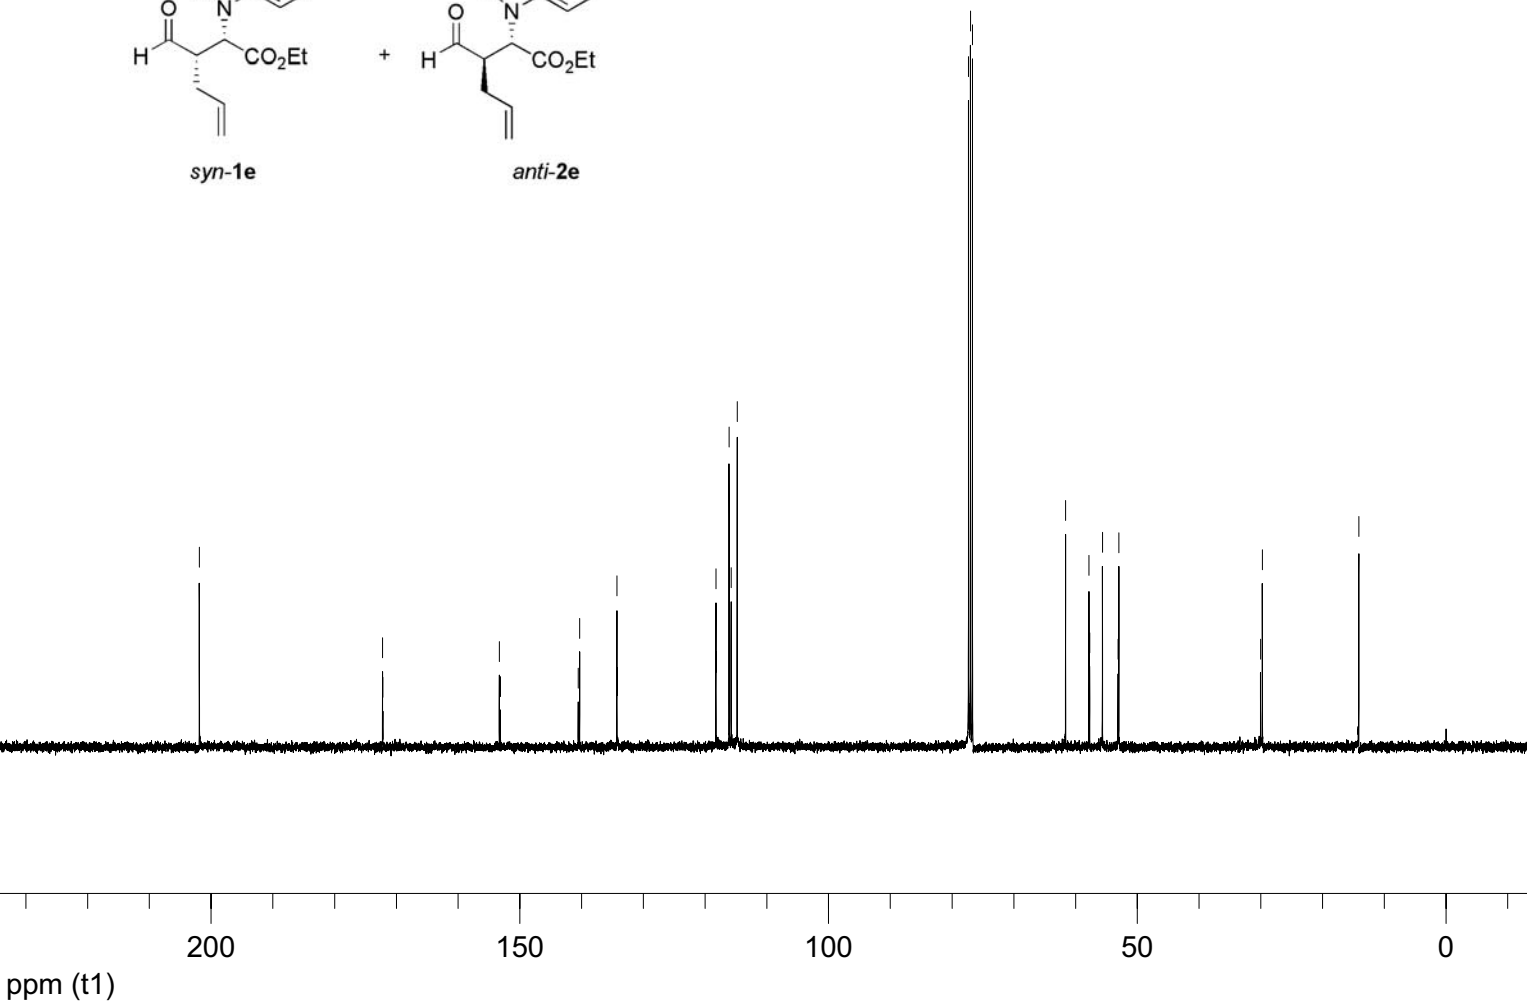

## II. Computational Supporting Information

### A. Authors of Computational Packages

Authors of Q-Chem 3.1:

J. Kong, C. A. White, A. I. Krylov, C. D. Sherrill,  
R. D. Adamson, T. R. Furlani, M. S. Lee, A. M. Lee,  
S. R. Gwaltney, T. R. Adams, C. Ochsenfeld, A. T. B. Gilbert,  
G. S. Kedziora, V. A. Rassolov, D. R. Maurice, N. Nair,  
Y. Shao, N. A. Besley, P. E. Maslen, J. P. Dombroski,  
H. Dachsel, W. M. Zhang, P. P. Korambath, J. Baker,  
E. F. C. Byrd, T. Van Voorhis, M. Oumi, S. Hirata,  
C. P. Hsu, N. Ishikawa, J. Florian, A. Warshel,  
B. G. Johnson, P. M. W. Gill, M. Head-Gordon, J. A. Pople,  
Q-Chem, Version 2.0, Q-Chem, Inc., Export, PA (2000).

Authors of Gaussian 03:

Gaussian 03, Revision C.01,  
M. J. Frisch, G. W. Trucks, H. B. Schlegel, G. E. Scuseria,  
M. A. Robb, J. R. Cheeseman, J. A. Montgomery, Jr., T. Vreven,  
K. N. Kudin, J. C. Burant, J. M. Millam, S. S. Iyengar, J. Tomasi,  
V. Barone, B. Mennucci, M. Cossi, G. Scalmani, N. Rega,  
G. A. Petersson, H. Nakatsuji, M. Hada, M. Ehara, K. Toyota,  
R. Fukuda, J. Hasegawa, M. Ishida, T. Nakajima, Y. Honda, O. Kitao,  
H. Nakai, M. Klene, X. Li, J. E. Knox, H. P. Hratchian, J. B. Cross,  
C. Adamo, J. Jaramillo, R. Gomperts, R. E. Stratmann, O. Yazyev,  
A. J. Austin, R. Cammi, C. Pomelli, J. W. Ochterski, P. Y. Ayala,  
K. Morokuma, G. A. Voth, P. Salvador, J. J. Dannenberg,  
V. G. Zakrzewski, S. Dapprich, A. D. Daniels, M. C. Strain,  
O. Farkas, D. K. Malick, A. D. Rabuck, K. Raghavachari,  
J. B. Foresman, J. V. Ortiz, Q. Cui, A. G. Baboul, S. Clifford,  
J. Cioslowski, B. B. Stefanov, G. Liu, A. Liashenko, P. Piskorz,  
I. Komaromi, R. L. Martin, D. J. Fox, T. Keith, M. A. Al-Laham,  
C. Y. Peng, A. Nanayakkara, M. Challacombe, P. M. W. Gill,  
B. Johnson, W. Chen, M. W. Wong, C. Gonzalez, and J. A. Pople,  
Gaussian, Inc., Wallingford CT, 2004.

B. Relevant geometries, energies, thermodynamic data, frequencies, and Gaussian route section of structures.

### i. Proline

Supporting Information: s-Trans-Re-3D-(Methyl-Syn)-(Esther-Anti).output

Using Gaussian 03: Al64T-G03RevC.01 3-Apr-2004

```
# opt=(calcf,ts,maxcycle=150,noeigentest) freq=norman hf/6-31g(d)
geom=connectivity scf=(direct,tight,maxcycle=300)
#N Geom=AllCheck Guess=Read SCRF=Check GenChk RHF/6-31G(d) Freq
```

```
Pointgroup= C1 Stoichiometry= C18H24N2O5 C1[X(C18H24N2O5)] #Atoms= 49
Charge = 0 Multiplicity = 1
```

```
SCF Energy= -1178.72703201 Predicted Change= -4.224142D-08
```

```
Optimization completed. {Found 1 times}
Item Max Val. Criteria Pass? RMS Val. Criteria Pass?
Force 0.00003 || 0.00045 [ YES ] 0.00000 || 0.00030 [ YES ]
Displ 0.00294 || 0.00180 [ NO ] 0.00294 || 0.00180 [ YES ]
```

| Atomic Type | Coordinates (Angstroms) |           |           |
|-------------|-------------------------|-----------|-----------|
|             | X                       | Y         | Z         |
| N           | -2.333029               | -0.898306 | 1.058454  |
| C           | -3.672608               | -0.314302 | 1.018508  |
| C           | -4.481064               | -1.320227 | 0.198287  |
| C           | -3.780096               | -2.650533 | 0.477822  |
| C           | -2.305354               | -2.264953 | 0.498097  |
| C           | -1.257931               | -0.282739 | 1.497454  |
| C           | -1.103871               | 1.050911  | 1.832378  |
| C           | -0.106644               | 1.643379  | -0.269540 |
| C           | 0.028003                | 1.473290  | 2.746924  |
| N           | 0.594674                | 0.700111  | -0.806472 |
| C           | 4.653095                | -0.070877 | -0.037237 |
| C           | 4.193147                | 1.243911  | -0.091004 |
| C           | 2.867590                | 1.506622  | -0.347347 |
| C           | 1.969555                | 0.459035  | -0.532779 |
| C           | 2.423500                | -0.846650 | -0.498104 |
| C           | 3.763346                | -1.112005 | -0.249855 |
| O           | 5.965670                | -0.221664 | 0.214457  |
| C           | 6.524617                | -1.506123 | 0.251542  |
| C           | -1.454355               | 1.956136  | -0.847085 |
| O           | -1.816353               | 3.179209  | -0.518386 |
| O           | -2.065718               | 1.218089  | -1.539796 |
| C           | -3.055770               | 3.645628  | -1.037388 |
| C           | -1.595945               | -2.302359 | -0.890080 |

## Supporting Information

```

O      -0.494217   -1.704194   -0.900580
O      -2.137414   -2.926605   -1.774489
H      -3.660134    0.667132    0.567893
H      -4.052835   -0.217143    2.032319
H      -5.529964   -1.316456    0.471009
H      -4.399101   -1.084352   -0.856138
H      -4.083398   -3.038282    1.447401
H      -3.969774   -3.395414   -0.278210
H      -1.728419   -2.900568    1.162369
H      -0.387752   -0.911352    1.537909
H      -1.987292    1.665998    1.879590
H      0.382787    2.424283    0.271868
H      0.916219    0.868589    2.589696
H      0.306142    2.512195    2.587268
H      -0.242296   1.386134    3.797380
H      0.078284   -0.093388   -1.206477
H      4.896732    2.042254    0.051534
H      2.544038    2.529034   -0.424831
H      1.727131   -1.646990   -0.664408
H      4.087977   -2.133601   -0.227740
H      6.082584   -2.106643    1.039142
H      6.407903   -2.014892   -0.699002
H      7.575612   -1.370104    0.455907
H      -3.049588    3.600720   -2.115952
H      -3.870332    3.047708   -0.655954
H      -3.147064    4.664944   -0.699650
    
```

```

Force  0.00001 || 0.00045 [ YES ]   0.00000 || 0.00030 [ YES ]
Displ  0.00137 || 0.00180 [ YES ]   0.00137 || 0.00180 [ YES ]
    
```

| Atomic Type | Coordinates (Angstroms) |           |           |
|-------------|-------------------------|-----------|-----------|
|             | X                       | Y         | Z         |
| N           | -2.275959               | -0.758751 | 1.207014  |
| C           | -3.576322               | -0.113885 | 1.383597  |
| C           | -4.553590               | -1.032645 | 0.641028  |
| C           | -3.847858               | -2.391428 | 0.618351  |
| C           | -2.376070               | -2.031259 | 0.461030  |
| C           | -1.125213               | -0.237880 | 1.574522  |
| C           | -0.859782               | 1.054619  | 1.987322  |
| C           | -0.037162               | 1.721596  | -0.107256 |
| C           | 0.363495                | 1.341077  | 2.834065  |
| N           | 0.631483                | 0.799045  | -0.734637 |
| C           | 4.664874                | -0.188391 | -0.099766 |
| C           | 4.266135                | 1.147299  | -0.083968 |
| C           | 2.949158                | 1.483427  | -0.295636 |
| C           | 1.998826                | 0.488187  | -0.505203 |
| C           | 2.391357                | -0.836920 | -0.536550 |
| C           | 3.722446                | -1.176881 | -0.334581 |
| O           | 5.974706                | -0.410640 | 0.112365  |
| C           | 6.473203                | -1.719487 | 0.079472  |
| C           | -1.376727               | 2.159979  | -0.638560 |
| O           | -1.895669               | 1.265081  | -1.424497 |
| O           | -1.828834               | 3.224582  | -0.369527 |
| C           | -3.109027               | 1.550484  | -2.116980 |
| C           | -1.891154               | -1.783938 | -0.997158 |
| O           | -0.664274               | -1.554292 | -1.068413 |
| O           | -2.725777               | -1.796224 | -1.882476 |
| H           | -3.575206               | 0.893077  | 0.986539  |
| H           | -3.799103               | -0.049425 | 2.444468  |
| H           | -5.521943               | -1.061007 | 1.126405  |
| H           | -4.690151               | -0.690159 | -0.375181 |
| H           | -4.002835               | -2.914379 | 1.558625  |
| H           | -4.187732               | -3.017621 | -0.192500 |
| H           | -1.716417               | -2.757524 | 0.920632  |
| H           | -0.293736               | -0.911093 | 1.469657  |
| H           | -1.691920               | 1.721711  | 2.137555  |
| H           | 0.489842                | 2.471067  | 0.443457  |
| H           | 1.193370                | 0.691366  | 2.574192  |
| H           | 0.699236                | 2.368077  | 2.717754  |
| H           | 0.160087                | 1.201982  | 3.893531  |
| H           | 0.085095                | 0.057257  | -1.183070 |
| H           | 5.009903                | 1.904629  | 0.077256  |
| H           | 2.670180                | 2.521544  | -0.317554 |
| H           | 1.655202                | -1.597648 | -0.719550 |
| H           | 3.998702                | -2.212451 | -0.364516 |
| H           | 6.022067                | -2.333717 | 0.851314  |
| H           | 6.310578                | -2.179713 | -0.889007 |
| H           | 7.533940                | -1.641407 | 0.262727  |
| H           | -3.360693               | 0.629791  | -2.612453 |

-----  
**Statistical Thermodynamic Analysis**

Temperature= 298.150 Kelvin      Pressure= 1.00000 Atm

```

=====
SCF Energy=      -1178.72703201      Predicted Change= -4.224142D-08
Zero-point correction (ZPE)=      -1178.2898      0.43720
Internal Energy (U)=      -1178.2662      0.46077
Enthalpy (H)=      -1178.2653      0.46172
Gibbs Free Energy (G)=      -1178.3447      0.38232
    
```

```

-----
Frequencies --  -318.6211           28.3273           29.6629
    
```

Supporting Information: s-Trans-Re-3D-(Methyl-Syn)-(Esther-Syn).output

Using Gaussian 03: Al64T-G03RevC.01 3-Apr-2004

```

=====
#hf/6-31g* scf=(direct,tight,maxcycle=300)
opt=(calcfc,maxcycle=150,ts,noeigentest) freq=norman
#N Geom=AllCheck Guess=Read SCRF=Check GenChk RHF/6-31G(d) Freq
    
```

```

-----
Pointgroup= C1    Stoichiometry= C18H24N2O5    C1[X(C18H24N2O5)]    #Atoms= 49
Charge = 0        Multiplicity = 1
    
```

```

-----
SCF Energy= -1178.73180651    Predicted Change= -2.397847D-08
    
```

```

=====
Optimization completed.            {Found        2        times}
Item    Max Val.    Criteria    Pass?    RMS Val.    Criteria    Pass?
    
```

## Supporting Information

```

H      -3.876720    1.841079   -1.415817
H      -2.941161    2.350734   -2.823099
  
```

-----  
**Statistical Thermodynamic Analysis**

Temperature= 298.150 Kelvin      Pressure= 1.00000 Atm

```

SCF Energy=      -1178.73180651      Predicted Change= -2.397847D-08
Zero-point correction (ZPE)=      -1178.2939      0.43783
Internal Energy (U)=      -1178.2705      0.46123
Enthalpy (H)=      -1178.2696      0.46217
Gibbs Free Energy (G)=      -1178.3476      0.38413
  
```

Frequencies -- -359.9596                      30.2640                      35.2485

Supporting Information: s-Trans-Re-3U-(Methyl-Anti)-(Esther-Anti).output

Using Gaussian 03: Al64T-G03RevC.01 3-Apr-2004

```

# opt=(calcf,ts,maxcycle=150,noeigentest) freq=noraman hf/6-31g(d)
geom=connectivity scf=(direct,tight,maxcycle=300)
#N Geom=AllCheck Guess=Read SCRF=Check GenChk RHF/6-31G(d) Freq
  
```

Pointgroup= C1    Stoichiometry= C18H24N2O5    C1[X(C18H24N2O5)]    #Atoms= 49  
Charge = 0                      Multiplicity = 1

SCF Energy= -1178.72599682    Predicted Change= -8.664731D-08

```

Optimization completed.      {Found      1      times}
Item      Max Val.      Criteria      Pass?      RMS Val.      Criteria      Pass?
Force      0.00005 || 0.00045 [ YES ]      0.00000 || 0.00030 [ YES ]
Displ      0.00527 || 0.00180 [ NO ]      0.00527 || 0.00180 [ YES ]
  
```

Atomic                      Coordinates (Angstroms)  
Type                      X                      Y                      Z

```

N      -2.478103    -0.998102    0.883540
C      -3.804374    -0.397913    0.744714
C      -4.663470    -1.559366    0.245728
C      -3.673706    -2.390693    -0.574753
C      -2.386873    -2.335612    0.243521
C      -1.435669    -0.406498    1.411720
C      -1.286653    0.924183    1.778154
C      -0.188141    1.553627    -0.180686
C      -0.231310    1.305129    2.797168
N      0.451964    0.617738    -0.817353
C      4.464231    -0.393147    -0.070679
C      4.088738    0.939452    -0.134435
C      2.763801    1.266230    -0.390053
C      1.812130    0.279106    -0.557104
C      2.190597    -1.062490    -0.513352
C      3.506162    -1.385305    -0.268886
O      5.717966    -0.822332    0.165838
C      6.748193    0.104609    0.356025
  
```

```

C      -1.456681    2.097034    -0.771332
O      -1.700151    3.299532    -0.288569
O      -2.107677    1.541682    -1.587273
C      -2.857970    3.965040    -0.775478
C      -1.072667    -2.423533    -0.573481
O      -0.978329    -1.608849    -1.508657
O      -0.244116    -3.222330    -0.163260
H      -3.777911    0.401884    0.016899
H      -4.133357    0.005044    1.695989
H      -5.038267    -2.134555    1.086984
H      -5.514552    -1.214489    -0.329308
H      -4.005105    -3.409456    -0.734532
H      -3.493291    -1.927092    -1.536328
H      -2.376142    -3.092828    1.018010
H      -0.571808    -1.045461    1.495850
H      -2.171964    1.539072    1.783691
H      0.371214    2.224234    0.435503
H      0.667586    0.706545    2.683160
H      0.052687    2.349682    2.699572
H      -0.583212    1.173718    3.817923
H      -0.098690    -0.076301    -1.335242
H      4.803379    1.729090    -0.010064
H      2.496077    2.304029    -0.480455
H      1.464845    -1.842414    -0.659165
H      3.812807    -2.413156    -0.224732
H      6.886007    0.729457    -0.520219
H      6.561467    0.733217    1.220618
H      7.645003    -0.471971    0.524548
H      -3.746594    3.408356    -0.515545
H      -2.863996    4.929219    -0.293906
H      -2.802780    4.075986    -1.847922
  
```

-----  
**Statistical Thermodynamic Analysis**

Temperature= 298.150 Kelvin      Pressure= 1.00000 Atm

```

SCF Energy=      -1178.72599682      Predicted Change= -8.664731D-08
Zero-point correction (ZPE)=      -1178.2884      0.43757
Internal Energy (U)=      -1178.2648      0.46111
Enthalpy (H)=      -1178.2639      0.46205
Gibbs Free Energy (G)=      -1178.3429      0.38303
  
```

Frequencies -- -353.2953                      25.0887                      36.4296

Supporting Information: s-Trans-Re-3U-(Methyl-Anti)-(Esther-Syn).output

Using Gaussian 03: Al64T-G03RevC.01 3-Apr-2004

```

#hf/6-31g* scf=(direct,tight,maxcycle=300)
opt=(calcf,ts,maxcycle=150,noeigentest) freq=noraman
#N Geom=AllCheck Guess=Read SCRF=Check GenChk RHF/6-31G(d) Freq
  
```

Pointgroup= C1    Stoichiometry= C18H24N2O5    C1[X(C18H24N2O5)]    #Atoms= 49  
Charge = 0                      Multiplicity = 1

## Supporting Information

SCF Energy= -1178.72658857 Predicted Change= -7.524670D-09

```

Optimization completed.      {Found      2      times}
Item      Max Val.      Criteria      Pass?      RMS Val.      Criteria      Pass?
Force      0.00001 || 0.00045 [ YES ]      0.00000 || 0.00030 [ YES ]
Displ      0.00080 || 0.00180 [ YES ]      0.00080 || 0.00180 [ YES ]
    
```

Atomic Coordinates (Angstroms)

| Atomic Type | X         | Y         | Z         |
|-------------|-----------|-----------|-----------|
| N           | -2.472152 | -1.157933 | 0.899739  |
| C           | -3.744743 | -0.592153 | 1.341800  |
| C           | -4.767041 | -1.456311 | 0.606429  |
| C           | -4.063645 | -1.765696 | -0.718898 |
| C           | -2.603954 | -1.987412 | -0.319589 |
| C           | -1.284617 | -0.846654 | 1.376889  |
| C           | -0.920336 | 0.194423  | 2.205319  |
| C           | -0.145608 | 1.491397  | 0.438044  |
| C           | 0.338038  | 0.087723  | 3.040344  |
| N           | 0.532980  | 0.859165  | -0.478099 |
| C           | 4.504006  | -0.479687 | -0.241888 |
| C           | 4.170391  | 0.763139  | 0.272881  |
| C           | 2.858957  | 1.213030  | 0.191530  |
| C           | 1.879986  | 0.423694  | -0.376865 |
| C           | 2.215241  | -0.821400 | -0.907291 |
| C           | 3.516735  | -1.262693 | -0.837641 |
| O           | 5.741774  | -1.008746 | -0.220342 |
| C           | 6.799885  | -0.285063 | 0.340549  |
| C           | -1.442222 | 2.165565  | 0.010312  |
| O           | -1.341227 | 2.586955  | -1.220499 |
| O           | -2.358395 | 2.366228  | 0.734685  |
| C           | -2.523001 | 3.076236  | -1.842404 |
| C           | -1.552821 | -1.509609 | -1.348498 |
| O           | -1.628611 | -0.299338 | -1.648657 |
| O           | -0.704060 | -2.321837 | -1.681024 |
| H           | -3.825182 | 0.445861  | 1.051950  |
| H           | -3.822285 | -0.654270 | 2.421213  |
| H           | -4.950935 | -2.371700 | 1.160848  |
| H           | -5.714874 | -0.946790 | 0.478279  |
| H           | -4.476577 | -2.626953 | -1.229659 |
| H           | -4.121926 | -0.911761 | -1.382556 |
| H           | -2.413479 | -3.024575 | -0.071185 |
| H           | -0.494214 | -1.475972 | 1.000058  |
| H           | -1.697180 | 0.825746  | 2.596958  |
| H           | 0.383657  | 1.969933  | 1.235610  |
| H           | 1.100679  | -0.506880 | 2.547906  |
| H           | 0.766240  | 1.065379  | 3.249900  |
| H           | 0.138367  | -0.372079 | 4.005513  |
| H           | -0.039562 | 0.460655  | -1.224120 |
| H           | 4.909164  | 1.398213  | 0.720739  |
| H           | 2.623797  | 2.194690  | 0.562262  |
| H           | 1.453432  | -1.431322 | -1.362680 |

|   |           |           |           |
|---|-----------|-----------|-----------|
| H | 3.792032  | -2.219679 | -1.238926 |
| H | 6.963031  | 0.649822  | -0.185269 |
| H | 6.627202  | -0.081505 | 1.392262  |
| H | 7.676686  | -0.906329 | 0.239316  |
| H | -2.919672 | 3.914701  | -1.289938 |
| H | -2.222482 | 3.378625  | -2.831743 |
| H | -3.249072 | 2.280299  | -1.897647 |

Statistical Thermodynamic Analysis

Temperature= 298.150 Kelvin Pressure= 1.00000 Atm

SCF Energy= -1178.72658857 Predicted Change= -7.524670D-09  
 Zero-point correction (ZPE)= -1178.2887 0.43786  
 Internal Energy (U)= -1178.2652 0.46130  
 Enthalpy (H)= -1178.2643 0.46224  
 Gibbs Free Energy (G)= -1178.3430 0.38352

Frequencies -- -380.4655 28.2735 36.5807

Supporting Information: s-Trans-Re-3U-(Methyl-Syn)-(Esther-Anti).output

Using Gaussian 03: IA32L-G03RevC.02 12-Jun-2004

```

# opt=(calcf,ts,maxcycle=150,noeigentest) freq=normal hf/6-31g(d)
geom=connectivity scf=(direct,tight,maxcycle=300)
#N Geom=AllCheck Guess=Read SCRF=Check GenChk RHF/6-31G(d) Freq
    
```

Pointgroup= C1 Stoichiometry= C18H24N2O5 C1[X(C18H24N2O5)] #Atoms= 49  
 Charge = 0 Multiplicity = 1

SCF Energy= -1178.72745322 Predicted Change= -4.261283D-09

```

Optimization completed.      {Found      2      times}
Item      Max Val.      Criteria      Pass?      RMS Val.      Criteria      Pass?
Force      0.00002 || 0.00045 [ YES ]      0.00000 || 0.00030 [ YES ]
Displ      0.00139 || 0.00180 [ YES ]      0.00139 || 0.00180 [ YES ]
    
```

Atomic Coordinates (Angstroms)

| Atomic Type | X         | Y         | Z         |
|-------------|-----------|-----------|-----------|
| N           | -2.310596 | -1.184266 | 0.869085  |
| C           | -3.700839 | -0.755343 | 0.723134  |
| C           | -4.407564 | -2.020930 | 0.239339  |
| C           | -3.322636 | -2.728636 | -0.576573 |
| C           | -2.049097 | -2.500601 | 0.233982  |
| C           | -1.354071 | -0.466598 | 1.403220  |
| C           | -1.377416 | 0.870759  | 1.775329  |
| C           | -0.363417 | 1.651389  | -0.171175 |
| C           | -0.384703 | 1.378010  | 2.802388  |
| N           | 0.385713  | 0.805880  | -0.814996 |
| C           | 4.472284  | 0.204999  | -0.026393 |
| C           | 3.943248  | 1.494762  | -0.032232 |
| C           | 2.608617  | 1.694155  | -0.297404 |

## Supporting Information

|   |           |           |           |
|---|-----------|-----------|-----------|
| C | 1.770195  | 0.608436  | -0.539829 |
| C | 2.293258  | -0.671618 | -0.555502 |
| C | 3.643276  | -0.871276 | -0.296371 |
| O | 5.788219  | 0.113266  | 0.240571  |
| C | 6.409733  | -1.142574 | 0.241979  |
| C | -1.685779 | 2.042575  | -0.764102 |
| O | -2.078688 | 3.199380  | -0.269368 |
| O | -2.258811 | 1.420378  | -1.590439 |
| C | -3.307066 | 3.723042  | -0.756836 |
| C | -0.743448 | -2.426905 | -0.598146 |
| O | -0.750957 | -1.585330 | -1.514161 |
| O | 0.169801  | -3.146475 | -0.223216 |
| H | -3.772591 | 0.032496  | -0.014757 |
| H | -4.078766 | -0.384840 | 1.669339  |
| H | -4.704374 | -2.629968 | 1.087882  |
| H | -5.296790 | -1.792689 | -0.336092 |
| H | -3.521624 | -3.783052 | -0.723965 |
| H | -3.207487 | -2.256516 | -1.544089 |
| H | -1.934772 | -3.246497 | 1.011109  |
| H | -0.416200 | -0.990658 | 1.490247  |
| H | -2.334474 | 1.366647  | 1.779888  |
| H | 0.107774  | 2.378806  | 0.454034  |
| H | 0.584289  | 0.900679  | 2.690613  |
| H | -0.236521 | 2.450853  | 2.711744  |
| H | -0.722092 | 1.196865  | 3.820418  |
| H | -0.079107 | 0.060076  | -1.342564 |
| H | 4.600080  | 2.323581  | 0.153655  |
| H | 2.228700  | 2.699460  | -0.338938 |
| H | 1.663879  | -1.519469 | -0.755616 |
| H | 4.017907  | -1.875631 | -0.307177 |
| H | 5.984199  | -1.793247 | 0.998037  |
| H | 6.335037  | -1.621136 | -0.728262 |
| H | 7.449120  | -0.962709 | 0.471329  |
| H | -4.121580 | 3.057776  | -0.509651 |
| H | -3.434614 | 4.673117  | -0.264265 |
| H | -3.259786 | 3.853121  | -1.827491 |

### Statistical Thermodynamic Analysis

Temperature= 298.150 Kelvin      Pressure= 1.00000 Atm

SCF Energy= -1178.72745322      Predicted Change= -4.261283D-09  
 Zero-point correction (ZPE)= -1178.2898      0.43764  
 Internal Energy (U)= -1178.2662      0.46120  
 Enthalpy (H)= -1178.2653      0.46214  
 Gibbs Free Energy (G)= -1178.3444      0.38301

Frequencies -- -357.7627      24.4570      34.6059

Supporting Information: s-Trans-Re-3U-(Methyl-Syn)-(Esther-Syn).output

Using Gaussian 03: IA32L-G03RevC.02 12-Jun-2004

# opt=(calcf,ts,maxcycle=150,noeigentest) freq=norman hf/6-31g(d)

geom=connectivity scf=(direct,tight,maxcycle=300)  
 #N Geom=AllCheck Guess=Read SCRF=Check GenChk RHF/6-31G(d) Freq

Pointgroup= C1    Stoichiometry= C18H24N2O5    C1[X(C18H24N2O5)]    #Atoms= 49  
 Charge = 0      Multiplicity = 1

SCF Energy= -1178.72758451    Predicted Change= -3.552982D-08

Optimization completed.      {Found      1      times}  
 Item    Max Val.    Criteria    Pass?    RMS Val.    Criteria    Pass?  
 Force    0.00002 || 0.00045 [ YES ]    0.00000 || 0.00030 [ YES ]  
 Displ    0.00230 || 0.00180 [ NO ]    0.00230 || 0.00180 [ YES ]

| Atomic Type | Coordinates (Angstroms) |           |           |
|-------------|-------------------------|-----------|-----------|
|             | X                       | Y         | Z         |
| N           | -2.374516               | -1.199598 | 0.930735  |
| C           | -3.708156               | -0.712528 | 1.275539  |
| C           | -4.621040               | -1.716670 | 0.575089  |
| C           | -3.835913               | -2.066346 | -0.693065 |
| C           | -2.381448               | -2.127229 | -0.222986 |
| C           | -1.240515               | -0.754197 | 1.430719  |
| C           | -1.003362               | 0.370102  | 2.194565  |
| C           | -0.265282               | 1.610295  | 0.376990  |
| C           | 0.219606                | 0.430673  | 3.085166  |
| N           | 0.495283                | 0.978253  | -0.472695 |
| C           | 4.538383                | -0.052332 | -0.014036 |
| C           | 4.084340                | 1.188819  | 0.430479  |
| C           | 2.762700                | 1.539606  | 0.282129  |
| C           | 1.863556                | 0.647222  | -0.294651 |
| C           | 2.310077                | -0.579879 | -0.748387 |
| C           | 3.647180                | -0.929958 | -0.609575 |
| O           | 5.848852                | -0.296927 | 0.172906  |
| C           | 6.398132                | -1.509523 | -0.263298 |
| C           | -1.594003               | 2.146467  | -0.137790 |
| O           | -1.488499               | 2.472292  | -1.396782 |
| O           | -2.545322               | 2.331624  | 0.544515  |
| C           | -2.682925               | 2.824045  | -2.083759 |
| C           | -1.332769               | -1.639479 | -1.250046 |
| O           | -1.492710               | -0.463689 | -1.639621 |
| O           | -0.413334               | -2.403821 | -1.498281 |
| H           | -3.860968               | 0.288798  | 0.898306  |
| H           | -3.829181               | -0.695304 | 2.352528  |
| H           | -4.752342               | -2.598383 | 1.195146  |
| H           | -5.601444               | -1.302908 | 0.370128  |
| H           | -4.151687               | -2.997864 | -1.146574 |
| H           | -3.936770               | -1.275562 | -1.426265 |
| H           | -2.114639               | -3.121695 | 0.114031  |
| H           | -0.383679               | -1.337487 | 1.133383  |
| H           | -1.848015               | 0.955583  | 2.509391  |
| H           | 0.192812                | 2.181947  | 1.157146  |
| H           | 1.052588                | -0.124945 | 2.666749  |
| H           | 0.552219                | 1.454079  | 3.242949  |

## Supporting Information

|   |           |           |           |
|---|-----------|-----------|-----------|
| H | 0.015617  | 0.019946  | 4.071303  |
| H | -0.015224 | 0.484864  | -1.206926 |
| H | 4.789820  | 1.867144  | 0.872159  |
| H | 2.439428  | 2.515020  | 0.598896  |
| H | 1.617577  | -1.268051 | -1.202992 |
| H | 3.965083  | -1.888792 | -0.968746 |
| H | 5.941830  | -2.354371 | 0.241106  |
| H | 6.290125  | -1.629010 | -1.335815 |
| H | 7.447525  | -1.470962 | -0.013495 |
| H | -3.152444 | 3.673751  | -1.611418 |
| H | -2.375861 | 3.066285  | -3.087494 |
| H | -3.351018 | 1.976980  | -2.090173 |

-----  
**Statistical Thermodynamic Analysis**

Temperature= 298.150 Kelvin      Pressure= 1.00000 Atm

=====  
 SCF Energy= -1178.72758451      Predicted Change= -3.552982D-08  
 Zero-point correction (ZPE)= -1178.2896      0.43791  
 Internal Energy (U)= -1178.2662      0.46135  
 Enthalpy (H)= -1178.2652      0.46230  
 Gibbs Free Energy (G)= -1178.3440      0.38350  
 -----

Frequencies -- -385.7647      29.2599      33.2389

Supporting Information: s-Trans-Si-3D-(Methyl-Syn)-(Esther-Anti).output

Using Gaussian 03: Al64T-G03RevC.01 3-Apr-2004

=====  
 # opt=(calcf,ts,maxcycle=150,noeigentest) freq=noraman hf/6-31g(d)  
 geom=connectivity scf=(direct,tight,maxcycle=300)  
 #N Geom=AllCheck Guess=Read SCRF=Check GenChk RHF/6-31G(d) Freq

Pointgroup= C1    Stoichiometry= C18H24N2O5    C1[X(C18H24N2O5)]    #Atoms= 49  
 Charge = 0      Multiplicity = 1

=====  
 SCF Energy= -1178.72819201    Predicted Change= -3.823938D-09

=====  
 Optimization completed.      {Found      2      times}  
 Item    Max Val.    Criteria    Pass?    RMS Val.    Criteria    Pass?  
 Force   0.00000 || 0.00045 [ YES ]    0.00000 || 0.00030 [ YES ]  
 Displ   0.00092 || 0.00180 [ YES ]    0.00092 || 0.00180 [ YES ]  
 -----

| Atomic Type | Coordinates (Angstroms) |           |           |
|-------------|-------------------------|-----------|-----------|
|             | X                       | Y         | Z         |
| N           | -1.238687               | 1.514613  | 0.987649  |
| C           | 0.025475                | 1.719464  | 1.700296  |
| C           | 0.499742                | 3.097618  | 1.224135  |
| C           | -0.788937               | 3.794038  | 0.776617  |
| C           | -1.567791               | 2.654781  | 0.114666  |
| C           | -2.075011               | 0.533543  | 1.237691  |
| C           | -1.804473               | -0.661137 | 1.875576  |
| C           | -1.030797               | -1.635952 | -0.109801 |

|   |           |           |           |
|---|-----------|-----------|-----------|
| C | -2.922865 | -1.518880 | 2.425075  |
| N | -0.117259 | -0.887446 | -0.636054 |
| C | 4.028933  | -1.033717 | 0.044165  |
| C | 3.185230  | -1.862937 | 0.778137  |
| C | 1.822570  | -1.828540 | 0.580914  |
| C | 1.271248  | -0.962392 | -0.360329 |
| C | 2.109047  | -0.130696 | -1.085837 |
| C | 3.480723  | -0.164798 | -0.886979 |
| O | 5.342563  | -1.145470 | 0.311976  |
| C | 6.264614  | -0.353675 | -0.385653 |
| C | -2.383463 | -1.694844 | -0.760648 |
| O | -2.927075 | -2.873907 | -0.542991 |
| O | -2.867356 | -0.824590 | -1.398512 |
| C | -4.202988 | -3.110949 | -1.128585 |
| C | -1.139257 | 2.495564  | -1.376301 |
| O | -0.449818 | 1.497779  | -1.678318 |
| O | -1.500934 | 3.416669  | -2.076185 |
| H | 0.741537  | 0.941336  | 1.481079  |
| H | -0.171811 | 1.705878  | 2.768343  |
| H | 1.028851  | 3.630381  | 2.005378  |
| H | 1.169579  | 2.983292  | 0.380582  |
| H | -1.332066 | 4.170375  | 1.639669  |
| H | -0.625988 | 4.609237  | 0.088044  |
| H | -2.636294 | 2.823104  | 0.132536  |
| H | -3.051540 | 0.665334  | 0.805011  |
| H | -0.851983 | -0.758693 | 2.370378  |
| H | -0.754048 | -2.503500 | 0.450379  |
| H | -3.852836 | -1.351608 | 1.889893  |
| H | -2.693492 | -2.578117 | 2.355277  |
| H | -3.112861 | -1.303464 | 3.474001  |
| H | -0.404918 | -0.031660 | -1.160737 |
| H | 3.618226  | -2.527947 | 1.501440  |
| H | 1.207213  | -2.480245 | 1.172622  |
| H | 1.681179  | 0.554667  | -1.792607 |
| H | 4.098779  | 0.492310  | -1.466427 |
| H | 6.228582  | -0.551894 | -1.451279 |
| H | 6.091879  | 0.702356  | -0.208955 |
| H | 7.238591  | -0.622819 | -0.006495 |
| H | -4.925892 | -2.406343 | -0.745535 |
| H | -4.141366 | -3.018041 | -2.202199 |
| H | -4.468727 | -4.116916 | -0.848150 |

-----  
**Statistical Thermodynamic Analysis**

Temperature= 298.150 Kelvin      Pressure= 1.00000 Atm

=====  
 SCF Energy= -1178.72819201      Predicted Change= -3.823938D-09  
 Zero-point correction (ZPE)= -1178.2911      0.43706  
 Internal Energy (U)= -1178.2676      0.46055  
 Enthalpy (H)= -1178.2666      0.46149  
 Gibbs Free Energy (G)= -1178.3458      0.38232  
 -----

Frequencies -- -335.0995      23.8204      31.9805



## Supporting Information

Supporting Information: s-Trans-Si-3D-(Methyl-Syn)-(Esther-Syn).output

Using Gaussian 03: Al64T-G03RevC.01 3-Apr-2004

```
#hf/6-31G* opt=(gdiis,calcfc,ts,noeigentest,maxcycle=300)
scf=(maxcycle=300,direct) freq=noraman
#N Geom=AllCheck Guess=Read SCRF=Check GenChk RHF/6-31G(d) Freq
```

Pointgroup= C1 Stoichiometry= C18H24N2O5 C1[X(C18H24N2O5)] #Atoms= 49  
Charge = 0 Multiplicity = 1

SCF Energy= -1178.72983665 Predicted Change= -1.400913D-09

```
Optimization completed.      {Found      2      times}
Item      Max Val.  Criteria  Pass?      RMS Val.  Criteria  Pass?
Force     0.00000 || 0.00045 [ YES ]    0.00000 || 0.00030 [ YES ]
Displ     0.00076 || 0.00180 [ YES ]    0.00076 || 0.00180 [ YES ]
```

| Atomic Type | Coordinates (Angstroms) |   |   |
|-------------|-------------------------|---|---|
|             | X                       | Y | Z |

|   |           |           |           |
|---|-----------|-----------|-----------|
| N | -1.272555 | 1.724564  | 0.944926  |
| C | 0.022169  | 2.183868  | 1.443783  |
| C | 0.343297  | 3.420498  | 0.587821  |
| C | -0.998779 | 3.825181  | -0.034437 |
| C | -1.716285 | 2.496026  | -0.226667 |
| C | -1.955208 | 0.704095  | 1.442950  |
| C | -1.465377 | -0.288903 | 2.254240  |
| C | -1.085285 | -1.670768 | 0.361385  |
| C | -2.348921 | -1.123176 | 3.151531  |
| N | -0.186812 | -1.161155 | -0.420757 |
| C | 3.971068  | -0.882125 | 0.058785  |
| C | 3.249934  | -1.792864 | 0.828363  |
| C | 1.885033  | -1.901283 | 0.689256  |
| C | 1.210205  | -1.091965 | -0.220143 |
| C | 1.922415  | -0.186305 | -0.986952 |
| C | 3.299119  | -0.080484 | -0.850667 |
| O | 5.299322  | -0.858025 | 0.269958  |
| C | 6.106063  | 0.015434  | -0.471780 |
| C | -2.480553 | -1.861351 | -0.223984 |
| O | -2.381036 | -2.267528 | -1.460296 |
| O | -3.486966 | -1.746279 | 0.388300  |
| C | -3.572810 | -2.265246 | -2.241625 |
| C | -1.301630 | 1.693677  | -1.487093 |
| O | -1.870195 | 0.581613  | -1.577440 |
| O | -0.424424 | 2.149397  | -2.200968 |
| H | 0.785887  | 1.422174  | 1.344647  |
| H | -0.073203 | 2.422628  | 2.498527  |
| H | 0.788919  | 4.209695  | 1.182017  |
| H | 1.034704  | 3.156737  | -0.199852 |
| H | -1.563980 | 4.450415  | 0.651630  |
| H | -0.875080 | 4.351230  | -0.969146 |
| H | -2.796183 | 2.584260  | -0.205581 |

|   |           |           |           |
|---|-----------|-----------|-----------|
| H | -2.978757 | 0.648225  | 1.121315  |
| H | -0.434672 | -0.211848 | 2.561568  |
| H | -0.805107 | -2.340072 | 1.147194  |
| H | -3.379855 | -1.104649 | 2.828659  |
| H | -2.034521 | -2.165440 | 3.178492  |
| H | -2.305166 | -0.761232 | 4.176330  |
| H | -0.581577 | -0.594667 | -1.173298 |
| H | 3.782447  | -2.413099 | 1.524419  |
| H | 1.361367  | -2.627237 | 1.283597  |
| H | 1.404851  | 0.451883  | -1.682425 |
| H | 3.820893  | 0.631738  | -1.458751 |
| H | 6.043235  | -0.195222 | -1.533764 |
| H | 5.836332  | 1.050507  | -0.292459 |
| H | 7.117700  | -0.151725 | -0.135020 |
| H | -4.312533 | -2.914576 | -1.798426 |
| H | -3.941817 | -1.254432 | -2.311594 |
| H | -3.278615 | -2.628440 | -3.212283 |

Statistical Thermodynamic Analysis

Temperature= 298.150 Kelvin Pressure= 1.00000 Atm

```
SCF Energy= -1178.72983665 Predicted Change= -1.400913D-09
Zero-point correction (ZPE)= -1178.2919 0.43789
Internal Energy (U)= -1178.2685 0.46129
Enthalpy (H)= -1178.2675 0.46224
Gibbs Free Energy (G)= -1178.3460 0.38376
```

Frequencies -- -311.6497 26.8917 34.1086

Supporting Information: s-Trans-Si-3D-(Methyl-Syn)-(Esther-Syn)2.output

Using Gaussian 03: Al64T-G03RevC.01 3-Apr-2004

```
# opt=(calcfc,ts,maxcycle=150,noeigentest) freq=noraman hf/6-31g(d)
geom=connectivity scf=(direct,tight,maxcycle=300)
#N Geom=AllCheck Guess=Read SCRF=Check GenChk RHF/6-31G(d) Freq
```

Pointgroup= C1 Stoichiometry= C18H24N2O5 C1[X(C18H24N2O5)] #Atoms= 49  
Charge = 0 Multiplicity = 1

SCF Energy= -1178.73475146 Predicted Change= -5.162964D-08

```
Optimization completed.      {Found      1      times}
Item      Max Val.  Criteria  Pass?      RMS Val.  Criteria  Pass?
Force     0.00002 || 0.00045 [ YES ]    0.00000 || 0.00030 [ YES ]
Displ     0.00344 || 0.00180 [ NO ]     0.00344 || 0.00180 [ YES ]
```

| Atomic Type | Coordinates (Angstroms) |   |   |
|-------------|-------------------------|---|---|
|             | X                       | Y | Z |

|   |           |          |          |
|---|-----------|----------|----------|
| N | -1.456171 | 1.108427 | 1.253720 |
| C | -0.178308 | 1.575374 | 1.795414 |
| C | -0.042847 | 3.004598 | 1.257239 |

## Supporting Information

|   |           |           |           |
|---|-----------|-----------|-----------|
| C | -1.480670 | 3.424357  | 0.933546  |
| C | -2.131728 | 2.130110  | 0.435488  |
| C | -1.995933 | -0.063050 | 1.507587  |
| C | -1.373534 | -1.198854 | 1.984665  |
| C | -0.701816 | -1.842178 | -0.130289 |
| C | -2.173393 | -2.345430 | 2.560352  |
| N | 0.076268  | -0.938987 | -0.647236 |
| C | 4.220322  | -0.470723 | -0.134880 |
| C | 3.564732  | -1.516789 | 0.508670  |
| C | 2.206099  | -1.689443 | 0.363601  |
| C | 1.470127  | -0.815808 | -0.433101 |
| C | 2.119828  | 0.229314  | -1.069167 |
| C | 3.487687  | 0.403075  | -0.923606 |
| O | 5.547384  | -0.391920 | 0.072209  |
| C | 6.289818  | 0.620635  | -0.549612 |
| C | -2.071525 | -2.066982 | -0.710075 |
| O | -2.511762 | -1.016035 | -1.337023 |
| O | -2.623300 | -3.112337 | -0.595864 |
| C | -3.766088 | -1.070093 | -2.018152 |
| C | -1.908481 | 1.914176  | -1.087218 |
| O | -0.769600 | 1.512529  | -1.413837 |
| O | -2.862415 | 2.184450  | -1.791647 |
| H | 0.643635  | 0.948064  | 1.484678  |
| H | -0.231618 | 1.549794  | 2.880161  |
| H | 0.434322  | 3.658375  | 1.978008  |
| H | 0.547799  | 2.997201  | 0.352863  |
| H | -1.986763 | 3.767294  | 1.831663  |
| H | -1.535281 | 4.213819  | 0.195466  |
| H | -3.194884 | 2.104396  | 0.632465  |
| H | -3.031178 | -0.142010 | 1.220233  |
| H | -0.363690 | -1.098170 | 2.347315  |
| H | -0.283280 | -2.712730 | 0.327873  |
| H | -3.171946 | -2.388371 | 2.140234  |
| H | -1.702321 | -3.303243 | 2.360570  |
| H | -2.272004 | -2.257285 | 3.639656  |
| H | -0.357812 | -0.121587 | -1.104345 |
| H | 4.140152  | -2.186479 | 1.119601  |
| H | 1.739320  | -2.509141 | 0.876925  |
| H | 1.549137  | 0.913784  | -1.668203 |
| H | 3.957855  | 1.222029  | -1.431385 |
| H | 6.225977  | 0.550340  | -1.630001 |
| H | 5.960622  | 1.604037  | -0.231787 |
| H | 7.314147  | 0.472893  | -0.243508 |
| H | -3.714802 | -1.800656 | -2.811726 |
| H | -4.548363 | -1.340488 | -1.324000 |
| H | -3.907914 | -0.075195 | -2.401627 |

Statistical Thermodynamic Analysis  
 Temperature= 298.150 Kelvin      Pressure= 1.00000 Atm

SCF Energy= -1178.73475146      Predicted Change= -5.162964D-08  
 Zero-point correction (ZPE)= -1178.2970      0.43774  
 Internal Energy (U)= -1178.2735      0.46117

Enthalpy (H)= -1178.2726      0.46212  
 Gibbs Free Energy (G)= -1178.3508      0.38387

Frequencies -- -343.5980      29.4364      32.0136

Supporting Information: s-Trans-Si-3D-(Methyl-Syn)-EW.output

Using Gaussian 03: Al64T-G03RevC.01 3-Apr-2004

# hf/6-31g(d) geom=connectivity scf=(direct,maxcycle=300,tight)  
 opt=(maxcycle=250,ts,calcfc,noeigentest) freq=noraman  
 #N Geom=AllCheck Guess=Read SCRF=Check GenChk RHF/6-31G(d) Freq

Pointgroup= C1    Stoichiometry= C18H24N2O5    C1[X(C18H24N2O5)]    #Atoms= 49  
 Charge = 0      Multiplicity = 1

SCF Energy= -1178.72418360    Predicted Change= -7.036011D-08

| Optimization completed. |          | {Found   |         | 1        |          | times}  |  |
|-------------------------|----------|----------|---------|----------|----------|---------|--|
| Item                    | Max Val. | Criteria | Pass?   | RMS Val. | Criteria | Pass?   |  |
| Force                   | 0.00004  | 0.00045  | [ YES ] | 0.00000  | 0.00030  | [ YES ] |  |
| Displ                   | 0.00362  | 0.00180  | [ NO ]  | 0.00362  | 0.00180  | [ YES ] |  |

| Atomic Type | Coordinates (Angstroms) |   |   |
|-------------|-------------------------|---|---|
|             | X                       | Y | Z |

|   |           |           |           |
|---|-----------|-----------|-----------|
| N | -1.219070 | 1.661855  | 0.989019  |
| C | 0.077003  | 2.005934  | 1.571014  |
| C | 0.500824  | 3.282128  | 0.825556  |
| C | -0.791598 | 3.816411  | 0.195984  |
| C | -1.581071 | 2.554678  | -0.124218 |
| C | -1.956189 | 0.619138  | 1.335023  |
| C | -1.544505 | -0.488220 | 2.035739  |
| C | -1.070717 | -1.667309 | 0.050740  |
| C | -2.507994 | -1.383110 | 2.779850  |
| N | -0.128551 | -1.089082 | -0.627244 |
| C | 4.007428  | -0.955209 | 0.066484  |
| C | 3.231963  | -1.911821 | 0.717645  |
| C | 1.873146  | -1.974821 | 0.506106  |
| C | 1.258872  | -1.072001 | -0.356544 |
| C | 2.025467  | -0.120535 | -1.006220 |
| C | 3.395955  | -0.061166 | -0.798348 |
| O | 5.324698  | -0.981683 | 0.340110  |
| C | 6.184298  | -0.073221 | -0.291641 |
| C | -2.371981 | -1.886811 | -0.710212 |
| O | -3.465550 | -1.485916 | -0.124467 |
| O | -2.316821 | -2.482099 | -1.731284 |
| C | -4.663930 | -1.610498 | -0.886945 |
| C | -1.177463 | 1.825661  | -1.433059 |
| O | -1.806433 | 0.761422  | -1.622096 |
| O | -0.248773 | 2.279735  | -2.081324 |
| H | 0.800938  | 1.211167  | 1.442543  |
| H | -0.049995 | 2.171122  | 2.636545  |

## Supporting Information

|   |           |           |           |
|---|-----------|-----------|-----------|
| H | 0.971811  | 3.994116  | 1.493156  |
| H | 1.202534  | 3.036404  | 0.041260  |
| H | -1.341951 | 4.421759  | 0.911443  |
| H | -0.603068 | 4.403820  | -0.690062 |
| H | -2.653902 | 2.708937  | -0.121680 |
| H | -2.963418 | 0.647911  | 0.967150  |
| H | -0.532255 | -0.491583 | 2.406913  |
| H | -0.823424 | -2.418065 | 0.771946  |
| H | -3.525530 | -1.249443 | 2.437998  |
| H | -2.261454 | -2.438317 | 2.665808  |
| H | -2.485331 | -1.175820 | 3.846973  |
| H | -0.476671 | -0.454842 | -1.343719 |
| H | 3.717647  | -2.604730 | 1.378544  |
| H | 1.308631  | -2.739729 | 1.006676  |
| H | 1.553732  | 0.587124  | -1.665860 |
| H | 3.960727  | 0.687737  | -1.317508 |
| H | 6.164141  | -0.194614 | -1.369144 |
| H | 5.931732  | 0.950927  | -0.039123 |
| H | 7.175663  | -0.294805 | 0.072991  |
| H | -4.573986 | -1.029602 | -1.791495 |
| H | -4.850342 | -2.646496 | -1.125352 |
| H | -5.446894 | -1.219418 | -0.257643 |

-----  
**Statistical Thermodynamic Analysis**

Temperature= 298.150 Kelvin      Pressure= 1.00000 Atm

=====

|                              |                |                   |               |
|------------------------------|----------------|-------------------|---------------|
| SCF Energy=                  | -1178.72418360 | Predicted Change= | -7.036011D-08 |
| Zero-point correction (ZPE)= | -1178.2863     |                   | 0.43782       |
| Internal Energy (U)=         |                | -1178.2628        | 0.46132       |
| Enthalpy (H)=                |                | -1178.2619        | 0.46227       |
| Gibbs Free Energy (G)=       |                | -1178.3409        | 0.38321       |

-----

|                |           |         |         |
|----------------|-----------|---------|---------|
| Frequencies -- | -321.1312 | 27.3948 | 33.6774 |
|----------------|-----------|---------|---------|

Supporting Information: s-Trans-Si-3U-(Methyl-Anti)-(Esther-Anti).output

-----

Using Gaussian 03: Al64T-G03RevC.01 3-Apr-2004

=====

```
# opt=(calcf,ts,maxcycle=150,noeigentest) freq=noraman hf/6-31g(d)
geom=connectivity scf=(direct,tight,maxcycle=300)
#N Geom=AllCheck Guess=Read SCRF=Check GenChk RHF/6-31G(d) Freq
```

-----

```
Pointgroup= C1    Stoichiometry= C18H24N2O5    C1[X(C18H24N2O5)]    #Atoms= 49
Charge = 0        Multiplicity = 1
```

-----

SCF Energy= -1178.72476431    Predicted Change= -5.196492D-08

-----

|                         |          |          |         |          |          |         |
|-------------------------|----------|----------|---------|----------|----------|---------|
| Optimization completed. |          | {Found   | 1       | times}   |          |         |
| Item                    | Max Val. | Criteria | Pass?   | RMS Val. | Criteria | Pass?   |
| Force                   | 0.00003  | 0.00045  | [ YES ] | 0.00000  | 0.00030  | [ YES ] |
| Displ                   | 0.00491  | 0.00180  | [ NO ]  | 0.00491  | 0.00180  | [ YES ] |

-----

Atomic                      Coordinates (Angstroms)

| Type | X         | Y         | Z         |
|------|-----------|-----------|-----------|
| N    | -1.053632 | 1.566540  | 0.993135  |
| C    | 0.191019  | 1.792266  | 1.726930  |
| C    | 0.337277  | 3.311427  | 1.685811  |
| C    | -0.217988 | 3.667279  | 0.306670  |
| C    | -1.389930 | 2.693960  | 0.095542  |
| C    | -1.915106 | 0.609366  | 1.264036  |
| C    | -1.675439 | -0.576538 | 1.928591  |
| C    | -0.971879 | -1.618512 | -0.041991 |
| C    | -2.815712 | -1.387444 | 2.504750  |
| N    | -0.158353 | -0.849454 | -0.689622 |
| C    | 4.029362  | -0.669717 | -0.371895 |
| C    | 3.327557  | -1.521582 | 0.462536  |
| C    | 1.940572  | -1.590196 | 0.379854  |
| C    | 1.249331  | -0.816844 | -0.531812 |
| C    | 1.959672  | 0.048274  | -1.368403 |
| C    | 3.329001  | 0.117201  | -1.286426 |
| O    | 5.367465  | -0.526699 | -0.374437 |
| C    | 6.151474  | -1.289314 | 0.498865  |
| C    | -2.366129 | -1.819493 | -0.569102 |
| O    | -2.748301 | -3.055814 | -0.321547 |
| O    | -3.005983 | -1.007174 | -1.140363 |
| C    | -4.036835 | -3.435034 | -0.794253 |
| C    | -1.523412 | 2.357167  | -1.414847 |
| O    | -0.853704 | 1.388557  | -1.840996 |
| H    | -2.207084 | 3.145502  | -2.028291 |
| O    | 1.024017  | 1.305504  | 1.234750  |
| H    | 0.107099  | 1.397152  | 2.731028  |
| H    | -0.266780 | 3.759676  | 2.469096  |
| H    | 1.363684  | 3.628689  | 1.828885  |
| H    | -0.539169 | 4.695893  | 0.219001  |
| H    | 0.538063  | 3.488567  | -0.450243 |
| H    | -2.321461 | 3.134512  | 0.427998  |
| H    | -2.884937 | 0.752723  | 0.818938  |
| H    | -0.722606 | -0.693479 | 2.418752  |
| H    | -0.587877 | -2.427316 | 0.542567  |
| H    | -3.739195 | -1.216000 | 1.959804  |
| H    | -2.609540 | -2.453264 | 2.476858  |
| H    | -3.004318 | -1.128018 | 3.543887  |
| H    | -0.552745 | -0.045208 | -1.235148 |
| H    | 3.830946  | -2.137976 | 1.181173  |
| H    | 1.431955  | -2.260262 | 1.047605  |
| H    | 1.418676  | 0.665111  | -2.060887 |
| H    | 3.883238  | 0.777794  | -1.926175 |
| H    | 5.913118  | -1.074141 | 1.535299  |
| H    | 6.030197  | -2.351474 | 0.314096  |
| H    | 7.175930  | -1.010148 | 0.305641  |
| H    | -4.084872 | -3.326423 | -1.867065 |
| H    | -4.157979 | -4.467525 | -0.510265 |
| H    | -4.797703 | -2.822571 | -0.334231 |

-----

Statistical Thermodynamic Analysis

## Supporting Information

Temperature= 298.150 Kelvin      Pressure= 1.00000 Atm

```

=====
SCF Energy=      -1178.72476431      Predicted Change= -5.196492D-08
Zero-point correction (ZPE)=      -1178.2880      0.43669
Internal Energy (U)=      -1178.2644      0.46030
Enthalpy (H)=      -1178.2635      0.46124
Gibbs Free Energy (G)=      -1178.3434      0.38133
=====
Frequencies --  -341.8275                      21.7791                      32.6269
    
```

Supporting Information: s-Trans-Si-3U-(Methyl-Anti)-(Esther-Syn).output

-----

Using Gaussian 03: AL64T-G03RevC.01 3-Apr-2004

```

=====
# hf/6-31g(d) geom=connectivity scf=(direct,maxcycle=300,tight)
opt=(maxcycle=250,ts,calcf, noeigentest) freq=noraman
#N Geom=AllCheck Guess=Read SCRF=Check GenChk RHF/6-31G(d) Freq

Pointgroup= C1    Stoichiometry= C18H24N2O5    C1[X(C18H24N2O5)]    #Atoms= 49
Charge = 0                      Multiplicity = 1

SCF Energy= -1178.7333904    Predicted Change= -1.065985D-07
    
```

```

=====
Optimization completed.                      {Found                      1                      times}
Item    Max Val.    Criteria    Pass?    RMS Val.    Criteria    Pass?
Force    0.00003 || 0.00045    [ YES ]    0.00000 || 0.00030    [ YES ]
Displ    0.00771 || 0.00180    [ NO ]    0.00771 || 0.00180    [ NO ]
    
```

| Atomic Type | Coordinates (Angstroms) |           |           |
|-------------|-------------------------|-----------|-----------|
|             | X                       | Y         | Z         |
| N           | -1.240376               | 1.354868  | 1.113335  |
| C           | 0.025418                | 1.812392  | 1.681849  |
| C           | -0.048812               | 3.325820  | 1.493408  |
| C           | -0.801699               | 3.470346  | 0.168338  |
| C           | -1.842079               | 2.345479  | 0.188597  |
| C           | -1.876205               | 0.257247  | 1.466897  |
| C           | -1.348782               | -0.857038 | 2.086961  |
| C           | -0.687569               | -1.809885 | 0.076958  |
| C           | -2.238995               | -1.861855 | 2.783575  |
| N           | 0.009694                | -0.969645 | -0.628107 |
| C           | 4.141980                | -0.221357 | -0.468988 |
| C           | 3.607605                | -1.224368 | 0.320595  |
| C           | 2.241703                | -1.484153 | 0.287356  |
| C           | 1.404662                | -0.747835 | -0.527562 |
| C           | 1.945014                | 0.267127  | -1.320880 |
| C           | 3.294428                | 0.522743  | -1.289558 |
| O           | 5.445400                | 0.110129  | -0.512623 |
| C           | 6.371371                | -0.600187 | 0.260584  |
| C           | -2.062555               | -2.211909 | -0.382601 |
| O           | -2.614051               | -1.290752 | -1.109712 |
| O           | -2.515385               | -3.272826 | -0.098546 |
| C           | -3.901533               | -1.505741 | -1.687244 |

```

C    -2.102563      1.707451      -1.204796
O    -1.086166      1.244595      -1.766532
O    -3.260560      1.706004      -1.579017
H    0.867976      1.392899      1.146606
H    0.094021      1.511964      2.720045
H    -0.615340      3.770310      2.306127
H    0.932953      3.784381      1.478466
H    -1.267101      4.440806      0.049192
H    -0.128193      3.310346      -0.663513
H    -2.784693      2.680436      0.603959
H    -2.901845      0.222877      1.139141
H    -0.338763      -0.786198      2.457776
H    -0.194537      -2.558200      0.659493
H    -3.240243      -1.866344      2.367067
H    -1.852891      -2.872416      2.697082
H    -2.326746      -1.639963      3.844489
H    -0.498358      -0.274388      -1.196674
H    4.227674      -1.817378      0.963658
H    1.866791      -2.275616      0.908888
H    1.289988      0.850074      -1.940810
H    3.719044      1.299776      -1.896845
H    6.160006      -0.502213      1.320271
H    6.387500      -1.651026      -0.008375
H    7.336215      -0.164931      0.049983
H    -4.614304      -1.746475      -0.912182
H    -4.139847      -0.570986      -2.161868
H    -3.846783      -2.317153      -2.398064
    
```

Statistical Thermodynamic Analysis

Temperature= 298.150 Kelvin      Pressure= 1.00000 Atm

```

=====
SCF Energy=      -1178.7333904      Predicted Change= -1.065985D-07
Zero-point correction (ZPE)=      -1178.2956      0.43767
Internal Energy (U)=      -1178.2722      0.46113
Enthalpy (H)=      -1178.2712      0.46208
Gibbs Free Energy (G)=      -1178.3499      0.38336
=====
Frequencies --  -334.0180                      22.0279                      31.1287

Supporting Information: s-Trans-Si-3U-(Methyl-Anti)-EW.output

-----

Using Gaussian 03: AL64T-G03RevC.01 3-Apr-2004

=====
#hf/6-31G* opt=(gdiis,ts, noeigentest, calcf, maxcycle=300)
scf=(maxcycle=300) freq=noraman
#N Geom=AllCheck Guess=Read SCRF=Check GenChk RHF/6-31G(d) Freq

Pointgroup= C1    Stoichiometry= C18H24N2O5    C1[X(C18H24N2O5)]    #Atoms= 49
Charge = 0                      Multiplicity = 1

SCF Energy= -1178.72709534    Predicted Change= -8.164340D-11

Optimization completed.                      {Found                      2                      times}
    
```

## Supporting Information

| Item  | Max Val. | Criteria | Pass?   | RMS Val. | Criteria | Pass?   |
|-------|----------|----------|---------|----------|----------|---------|
| Force | 0.00000  | 0.00045  | [ YES ] | 0.00000  | 0.00030  | [ YES ] |
| Displ | 0.00024  | 0.00180  | [ YES ] | 0.00024  | 0.00180  | [ YES ] |

| Atomic Type | Coordinates (Angstroms) |           |           |
|-------------|-------------------------|-----------|-----------|
|             | X                       | Y         | Z         |
| N           | -1.273567               | 1.511027  | 0.982120  |
| C           | -0.032406               | 2.220329  | 1.274101  |
| C           | -0.300009               | 3.623350  | 0.728732  |
| C           | -1.216815               | 3.358096  | -0.466186 |
| C           | -2.122864               | 2.215087  | 0.010208  |
| C           | -1.706101               | 0.443141  | 1.646196  |
| C           | -0.953874               | -0.428034 | 2.383847  |
| C           | -0.616911               | -1.709468 | 0.371751  |
| C           | -1.555920               | -1.392088 | 3.377517  |
| N           | 0.063898                | -0.981025 | -0.447805 |
| C           | 4.177009                | -0.154030 | -0.553139 |
| C           | 3.669913                | -0.921570 | 0.481298  |
| C           | 2.309339                | -1.202262 | 0.540418  |
| C           | 1.451450                | -0.725813 | -0.430430 |
| C           | 1.965103                | 0.049753  | -1.469978 |
| C           | 3.307706                | 0.332117  | -1.530008 |
| O           | 5.471585                | 0.176343  | -0.702053 |
| C           | 6.419333                | -0.277406 | 0.224396  |
| C           | -2.030853               | -2.114219 | -0.040101 |
| O           | -2.001092               | -2.554135 | -1.266988 |
| O           | -2.963756               | -2.127271 | 0.687307  |
| C           | -3.256237               | -2.710450 | -1.931886 |
| C           | -2.623163               | 1.363648  | -1.181179 |
| O           | -2.006755               | 0.296427  | -1.423074 |
| O           | -3.556625               | 1.846205  | -1.783237 |
| H           | 0.815826                | 1.763997  | 0.775062  |
| H           | 0.162587                | 2.207707  | 2.340282  |
| H           | -0.818288               | 4.216526  | 1.476056  |
| H           | 0.613638                | 4.142743  | 0.463329  |
| H           | -1.792143               | 4.218727  | -0.777302 |
| H           | -0.628791               | 3.027004  | -1.317363 |
| H           | -2.995423               | 2.615991  | 0.514837  |
| H           | -2.752062               | 0.230520  | 1.518250  |
| H           | 0.089735                | -0.194013 | 2.523991  |
| H           | -0.120253               | -2.366996 | 1.055543  |
| H           | -2.605959               | -1.558989 | 3.181804  |
| H           | -1.061372               | -2.361804 | 3.353152  |
| H           | -1.453498               | -1.018261 | 4.393903  |
| H           | -0.533274               | -0.402402 | -1.056416 |
| H           | 4.308139                | -1.308097 | 1.251202  |
| H           | 1.948732                | -1.793624 | 1.361016  |
| H           | 1.301067                | 0.422333  | -2.229237 |
| H           | 3.710725                | 0.926078  | -2.328309 |
| H           | 6.210719                | 0.100026  | 1.219781  |
| H           | 6.459358                | -1.361099 | 0.249387  |
| H           | 7.371667                | 0.105794  | -0.108117 |

|   |           |           |           |
|---|-----------|-----------|-----------|
| H | -3.711349 | -1.738181 | -2.032914 |
| H | -3.015956 | -3.120719 | -2.898836 |
| H | -3.891208 | -3.384902 | -1.378294 |

Statistical Thermodynamic Analysis  
 Temperature= 298.150 Kelvin      Pressure= 1.00000 Atm

---

SCF Energy= -1178.72709534      Predicted Change= -8.164340D-11  
 Zero-point correction (ZPE)= -1178.2901      0.43691  
 Internal Energy (U)= -1178.2665      0.46053  
 Enthalpy (H)= -1178.2656      0.46147  
 Gibbs Free Energy (G)= -1178.3452      0.38182

---

Frequencies -- -276.6720      18.4877      32.1715

Supporting Information: s-Cis-Re-3D-(Methyl-Syn)-(Esther-Syn).output

---

Using Gaussian 03: AL64T-G03RevC.01 3-Apr-2004

---

#hf/6-31g\* scf=(direct,tight,maxcycle=300)  
 opt=(calcfc,maxcycle=150,ts,noeigentest) freq=norman  
 #N Geom=AllCheck Guess=Read SCRF=Check GenChk RHF/6-31G(d) Freq

---

Pointgroup= C1    Stoichiometry= C18H24N2O5    C1[X[C18H24N2O5]]    #Atoms= 49  
 Charge = 0      Multiplicity = 1

---

SCF Energy= -1178.72895441    Predicted Change= -2.836096D-09

---

| Item  | Max Val. | Criteria | Pass?   | RMS Val. | Criteria | Pass?   |
|-------|----------|----------|---------|----------|----------|---------|
| Force | 0.00001  | 0.00045  | [ YES ] | 0.00000  | 0.00030  | [ YES ] |
| Displ | 0.00120  | 0.00180  | [ YES ] | 0.00120  | 0.00180  | [ YES ] |

---

| Atomic Type | Coordinates (Angstroms) |           |           |
|-------------|-------------------------|-----------|-----------|
|             | X                       | Y         | Z         |
| N           | 2.714871                | 0.883153  | 0.825957  |
| C           | 4.033226                | 1.002841  | 0.199134  |
| C           | 4.010507                | 2.388185  | -0.454022 |
| C           | 2.964928                | 3.153133  | 0.362591  |
| C           | 1.901163                | 2.084866  | 0.637226  |
| C           | 2.322905                | -0.221808 | 1.423506  |
| C           | 1.069496                | -0.575945 | 1.885179  |
| C           | 0.176022                | -1.778746 | 0.077240  |
| C           | 0.957407                | -1.610367 | 2.988490  |
| N           | -0.514991               | -0.989911 | -0.683005 |
| C           | -4.544687               | -0.006426 | -0.015932 |
| C           | -3.641304               | 0.966380  | -0.412756 |
| C           | -2.308934               | 0.640853  | -0.629637 |
| C           | -1.879650               | -0.660448 | -0.445845 |
| C           | -2.791353               | -1.645221 | -0.073450 |
| C           | -4.108782               | -1.320248 | 0.149838  |
| O           | -5.850882               | 0.210760  | 0.222075  |

## Supporting Information

|   |           |           |           |
|---|-----------|-----------|-----------|
| C | -6.380158 | 1.499206  | 0.069046  |
| C | 0.901244  | 1.979928  | -0.538136 |
| O | 0.026304  | 2.833120  | -0.534737 |
| O | 1.093885  | 1.056031  | -1.349762 |
| C | 1.458368  | -2.405897 | -0.396099 |
| O | 1.895597  | -1.893608 | -1.511458 |
| O | 1.950470  | -3.314760 | 0.192017  |
| C | 3.072393  | -2.450053 | -2.080015 |
| H | 4.185257  | 0.213553  | -0.525705 |
| H | 4.807679  | 0.927866  | 0.957659  |
| H | 4.988052  | 2.855653  | -0.444828 |
| H | 3.681402  | 2.300437  | -1.481294 |
| H | 3.394721  | 3.501851  | 1.297460  |
| H | 2.545952  | 4.002623  | -0.158204 |
| H | 1.343599  | 2.292610  | 1.540619  |
| H | 3.108473  | -0.952756 | 1.544788  |
| H | -0.041514 | -2.034262 | 3.035517  |
| H | 1.653789  | -2.428989 | 2.838208  |
| H | 1.155396  | -1.181165 | 3.968125  |
| H | 0.018784  | -0.349638 | -1.278659 |
| H | -3.944165 | 1.985144  | -0.552411 |
| H | -1.616573 | 1.412183  | -0.916507 |
| H | -2.481534 | -2.671030 | 0.018560  |
| H | -4.822988 | -2.069623 | 0.434677  |
| H | -5.907377 | 2.203238  | 0.744894  |
| H | -6.273003 | 1.851453  | -0.950992 |
| H | -7.429367 | 1.423062  | 0.310994  |
| H | -0.329125 | -2.349850 | 0.826742  |
| H | 0.293086  | 0.169935  | 1.849799  |
| H | 3.270082  | -1.862722 | -2.960751 |
| H | 3.894625  | -2.380733 | -1.383454 |
| H | 2.905863  | -3.485284 | -2.339135 |

Charge = 0      Multiplicity = 1

-----  
 SCF Energy= -1178.73093062      Predicted Change= -1.241419D-07  
 -----

Optimization completed.      {Found      1      times}  
 Item      Max Val.      Criteria      Pass?      RMS Val.      Criteria      Pass?  
 Force      0.00002 ||      0.00045      [ YES ]      0.00000 ||      0.00030      [ YES ]  
 Displ      0.00674 ||      0.00180      [ NO ]      0.00674 ||      0.00180      [ YES ]  
 -----

| Atomic Type | Coordinates (Angstroms) |           |           |
|-------------|-------------------------|-----------|-----------|
|             | X                       | Y         | Z         |
| N           | -2.862789               | -1.000658 | 0.819330  |
| C           | -4.295994               | -0.742111 | 0.742320  |
| C           | -4.816827               | -1.972870 | 0.010347  |
| C           | -3.695560               | -2.261022 | -0.992460 |
| C           | -2.398956               | -1.899483 | -0.244519 |
| C           | -2.079701               | -0.417537 | 1.709531  |
| C           | -0.706589               | -0.435770 | 1.791984  |
| C           | -0.114845               | 1.434711  | 0.476094  |
| C           | -0.041121               | -0.083359 | 3.107035  |
| N           | 0.657270                | 0.988461  | -0.464449 |
| C           | 4.674845                | -0.132327 | -0.002119 |
| C           | 3.785546                | -0.965788 | -0.662432 |
| C           | 2.455524                | -0.593552 | -0.806474 |
| C           | 2.017946                | 0.612947  | -0.295338 |
| C           | 2.913395                | 1.461720  | 0.347785  |
| C           | 4.228218                | 1.087907  | 0.503073  |
| O           | 5.978191                | -0.403666 | 0.194136  |
| C           | 6.520538                | -1.600768 | -0.290870 |
| C           | -1.369513               | -1.230237 | -1.175272 |
| O           | -1.628042               | -0.058241 | -1.510246 |
| O           | -0.389980               | -1.900115 | -1.476076 |
| C           | -1.422811               | 2.110606  | 0.090570  |
| O           | -1.295923               | 2.709362  | -1.063188 |
| O           | -2.356897               | 2.199124  | 0.814782  |
| C           | -2.480924               | 3.225771  | -1.654617 |
| H           | -4.484139               | 0.162921  | 0.174682  |
| H           | -4.713502               | -0.617984 | 1.734426  |
| H           | -4.928341               | -2.797368 | 0.708136  |
| H           | -5.775932               | -1.799798 | -0.463766 |
| H           | -3.684198               | -3.286546 | -1.338836 |
| H           | -3.800770               | -1.614021 | -1.855222 |
| H           | -1.943438               | -2.772753 | 0.206547  |
| H           | -2.613331               | 0.164700  | 2.439191  |
| H           | 0.975970                | 0.269912  | 2.960266  |
| H           | -0.587882               | 0.695957  | 3.632643  |
| H           | 0.026328                | -0.939125 | 3.775213  |
| H           | 0.159835                | 0.663710  | -1.286288 |
| H           | 4.100866                | -1.908458 | -1.064174 |
| H           | 1.752640                | -1.242650 | -1.296957 |
| H           | 2.589590                | 2.422388  | 0.707101  |
| H           | 4.933062                | 1.731674  | 0.994528  |

-----  
 Statistical Thermodynamic Analysis

Temperature= 298.150 Kelvin      Pressure= 1.00000 Atm

-----  
 SCF Energy= -1178.72895441      Predicted Change= -2.836096D-09  
 Zero-point correction (ZPE)= -1178.2915      0.43737  
 Internal Energy (U)= -1178.2679      0.46102  
 Enthalpy (H)= -1178.2669      0.46196  
 Gibbs Free Energy (G)= -1178.3466      0.38234  
 -----

Frequencies -- -343.3812      26.7189      28.3309

Supporting Information: s-Cis-Re-3U-(Methyl-Syn)-(Esther-Syn).output

Using Gaussian 03: AL64T-G03RevC.01 3-Apr-2004

-----  
 # opt=(calcf,c,ts,maxcycle=150,noeigentest) freq=norman hf/6-31g(d)  
 geom=connectivity scf=(direct,tight,maxcycle=300)  
 #N Geom=AllCheck Guess=Read SCRF=Check GenChk RHF/6-31G(d) Freq  
 -----

Pointgroup= C1      Stoichiometry= C18H24N2O5      C1[X(C18H24N2O5)]      #Atoms= 49

## Supporting Information

```

H      6.042768   -2.462982   0.161438
H      6.433658   -1.665256  -1.370004
H      7.564881   -1.589285  -0.018229
H      0.328095   1.770882   1.390413
H     -0.169016  -1.114958   1.154224
H     -2.168268   3.671439  -2.584655
H     -3.165843   2.412462  -1.837167
H     -2.932211   3.965759  -1.010794
  
```

```

C      1.997534   0.183733  -1.447687
C      1.343665  -0.755571  -0.645055
C      2.075332  -1.483520   0.272967
C      3.448356  -1.296707   0.395317
O      5.414296  -0.114779  -0.370564
C      6.239909  -0.823430   0.510349
C     -1.883412   1.953570  -1.189348
O     -2.838660   2.441810  -1.750126
O     -0.850875   1.436193  -1.672974
C     -2.213924  -1.937349  -0.690568
O     -2.716638  -3.037115  -0.166047
O     -2.755541  -1.239732  -1.473939
C     -4.039853  -3.382943  -0.561899
H      1.127362   2.095895   0.633255
H      0.585748   2.479375   2.262122
H      0.035468   4.587499   1.325619
H      0.012137   3.929468  -0.299464
H     -2.185054   3.683192   1.787134
H     -2.367275   4.183591   0.107312
H     -2.884916   1.635864   0.703630
H      0.061529   0.185170   2.358329
H     -2.027980  -2.725411   2.440610
H     -0.695828  -1.888662   3.215622
H     -2.347837  -1.524719   3.665961
H     -0.495132  -0.125890  -1.362749
H      3.864584   1.086741  -1.939907
H      1.423550   0.769260  -2.140243
H      1.610029  -2.210977   0.911566
H      3.985065  -1.881184   1.116460
H      5.958326  -0.648791   1.543496
H      6.215458  -1.888321   0.304746
H      7.240641  -0.453357   0.348374
H     -0.399826  -2.495214   0.413435
H     -2.712394  -0.493349   1.322589
H     -4.270606  -4.295805  -0.037502
H     -4.728697  -2.599397  -0.283647
H     -4.080267  -3.536348  -1.629633
  
```

-----  
**Statistical Thermodynamic Analysis**

Temperature= 298.150 Kelvin      Pressure= 1.00000 Atm

```

=====
SCF Energy=      -1178.73093062      Predicted Change= -1.241419D-07
Zero-point correction (ZPE)=      -1178.2929      0.43801
Internal Energy (U)=                -1178.2695      0.46140
Enthalpy (H)=                       -1178.2685      0.46234
Gibbs Free Energy (G)=              -1178.3467      0.38416
  
```

```

-----
Frequencies --  -358.0984           32.3287           36.4093
  
```

Supporting Information: s-Cis-Si-3D-(Methyl-Anti)-(Esther-Anti).output

-----  
Using Gaussian 03: IA32L-G03RevC.02 12-Jun-2004

```

=====
# opt=(calcf,ts,maxcycle=150,noeigentest) freq=norman hf/6-31g(d)
geom=connectivity scf=(direct,tight,maxcycle=300)
#N Geom=AllCheck Guess=Read SCRF=Check GenChk RHF/6-31G(d) Freq
  
```

```

-----
Pointgroup= C1    Stoichiometry= C18H24N2O5    C1[X(C18H24N2O5)]    #Atoms= 49
Charge = 0        Multiplicity = 1
  
```

```

-----
SCF Energy= -1178.72183168    Predicted Change= -2.098532D-09
  
```

```

=====
Optimization completed.            {Found            2            times}
Item    Max Val.    Criteria    Pass?    RMS Val.    Criteria    Pass?
Force   0.00000 || 0.00045    [ YES ]    0.00000 || 0.00030    [ YES ]
Displ   0.00132 || 0.00180    [ YES ]    0.00132 || 0.00180    [ YES ]
  
```

```

-----
Atomic                    Coordinates (Angstroms)
Type                    X                    Y                    Z
-----
N       -0.827746       1.464654       1.096756
C       0.280846       2.420756       1.222439
C       -0.299737       3.752485       0.721824
C       -1.816300       3.538802       0.774861
C       -1.954117       2.068442       0.366995
C       -0.829885       0.334977       1.769494
C       -1.746943       -0.694201       1.753878
C       -0.815872       -1.716303       -0.188721
C       -1.702172       -1.763470       2.823571
N       -0.048086       -0.912157       -0.843256
C       4.094683       -0.372352       -0.406395
C       3.352905       0.368559       -1.327426
  
```

-----  
**Statistical Thermodynamic Analysis**

Temperature= 298.150 Kelvin      Pressure= 1.00000 Atm

```

=====
SCF Energy=      -1178.72183168      Predicted Change= -2.098532D-09
Zero-point correction (ZPE)=      -1178.2851      0.43667
Internal Energy (U)=                -1178.2615      0.46032
Enthalpy (H)=                       -1178.2605      0.46126
Gibbs Free Energy (G)=              -1178.3402      0.38155
  
```

```

-----
Frequencies --  -321.3832           26.6393           29.8186
  
```

Supporting Information: s-Cis-Si-3D-(Methyl-Anti)-(Esther-Syn).output

-----  
Using Gaussian 03: IA32L-G03RevC.02 12-Jun-2004

## Supporting Information

```
# opt=(calcf,ts,maxcycle=150,noeigentest) freq=noraman hf/6-31g(d)
geom=connectivity scf=(direct,tight,maxcycle=300)
#N Geom=AllCheck Guess=Read SCRF=Check GenChk RHF/6-31G(d) Freq
```

```
Pointgroup= C1 Stoichiometry= C18H24N2O5 C1[X(C18H24N2O5)] #Atoms= 49
Charge = 0 Multiplicity = 1
```

```
SCF Energy= -1178.73150774 Predicted Change= -7.686978D-08
```

```
Optimization completed. {Found 1 times}
Item Max Val. Criteria Pass? RMS Val. Criteria Pass?
Force 0.00001 || 0.00045 [ YES ] 0.00000 || 0.00030 [ YES ]
Displ 0.01922 || 0.00180 [ NO ] 0.01922 || 0.00180 [ NO ]
```

```
Atomic Coordinates (Angstroms)
Type X Y Z
```

|   |           |           |           |
|---|-----------|-----------|-----------|
| N | -0.937990 | 1.412953  | 1.173257  |
| C | 0.069980  | 2.479889  | 1.192878  |
| C | -0.589875 | 3.636126  | 0.435523  |
| C | -2.087360 | 3.353071  | 0.582215  |
| C | -2.159688 | 1.824810  | 0.466739  |
| C | -0.780352 | 0.307344  | 1.871587  |
| C | -1.589481 | -0.805865 | 1.925397  |
| C | -0.610584 | -1.878224 | 0.056773  |
| C | -1.412644 | -1.833170 | 3.021815  |
| N | 0.055247  | -1.072407 | -0.708472 |
| C | 4.128594  | -0.064399 | -0.483715 |
| C | 3.239360  | 0.661768  | -1.275839 |
| C | 1.908746  | 0.323066  | -1.328819 |
| C | 1.430610  | -0.759305 | -0.586279 |
| C | 2.311083  | -1.483170 | 0.194132  |
| C | 3.656577  | -1.137845 | 0.252046  |
| O | 5.407591  | 0.351194  | -0.501196 |
| C | 6.374892  | -0.336090 | 0.242272  |
| C | -2.228622 | 1.411884  | -1.031214 |
| O | -3.352761 | 1.435635  | -1.497048 |
| O | -1.142121 | 1.156174  | -1.591582 |
| C | -1.985736 | -2.343076 | -0.339082 |
| O | -2.547356 | -1.525696 | -1.172970 |
| O | -2.428691 | -3.361539 | 0.083955  |
| C | -3.876125 | -1.775278 | -1.630859 |
| H | 0.987085  | 2.147312  | 0.725403  |
| H | 0.287687  | 2.751121  | 2.221894  |
| H | -0.295615 | 4.598665  | 0.836969  |
| H | -0.309779 | 3.598693  | -0.608380 |
| H | -2.438706 | 3.668832  | 1.560844  |
| H | -2.694829 | 3.836357  | -0.170142 |
| H | -3.025495 | 1.424734  | 0.974120  |
| H | 0.148529  | 0.270477  | 2.419382  |
| H | -1.691106 | -2.824764 | 2.680055  |
| H | -0.381474 | -1.874062 | 3.364625  |
| H | -2.032336 | -1.612551 | 3.887877  |

|   |           |           |           |
|---|-----------|-----------|-----------|
| H | -0.488594 | -0.398140 | -1.267713 |
| H | 3.616793  | 1.491268  | -1.843605 |
| H | 1.220815  | 0.892857  | -1.924354 |
| H | 1.982724  | -2.335759 | 0.761276  |
| H | 4.311699  | -1.723513 | 0.866399  |
| H | 6.153396  | -0.305242 | 1.303915  |
| H | 6.459991  | -1.368697 | -0.078924 |
| H | 7.310133  | 0.170708  | 0.060393  |
| H | -0.097087 | -2.545194 | 0.714753  |
| H | -2.581741 | -0.715798 | 1.518162  |
| H | -4.153175 | -0.878540 | -2.154786 |
| H | -3.877315 | -2.640372 | -2.277849 |
| H | -4.526480 | -1.947571 | -0.786512 |

```
Statistical Thermodynamic Analysis
Temperature= 298.150 Kelvin Pressure= 1.00000 Atm
```

```
SCF Energy= -1178.73150774 Predicted Change= -7.686978D-08
Zero-point correction (ZPE)= -1178.2940 0.43745
Internal Energy (U)= -1178.2705 0.46099
Enthalpy (H)= -1178.2695 0.46194
Gibbs Free Energy (G)= -1178.3491 0.38240
```

```
Frequencies -- -322.0500 10.6624 32.0141
```

```
Supporting Information: s-Cis-Si-3D-(Methyl-Syn)-(Esther-Anti).output
```

```
Using Gaussian 03: A164T-G03RevC.01 3-Apr-2004
```

```
# hf/6-31g(d) geom=connectivity scf=(direct,maxcycle=300,tight)
opt=(maxcycle=250,ts,calcf,noeigentest) freq=noraman
#N Geom=AllCheck Guess=Read SCRF=Check GenChk RHF/6-31G(d) Freq
```

```
Pointgroup= C1 Stoichiometry= C18H24N2O5 C1[X(C18H24N2O5)] #Atoms= 49
Charge = 0 Multiplicity = 1
```

```
SCF Energy= -1178.72252053 Predicted Change= -1.336334D-08
```

```
Optimization completed. {Found 1 times}
Item Max Val. Criteria Pass? RMS Val. Criteria Pass?
Force 0.00001 || 0.00045 [ YES ] 0.00000 || 0.00030 [ YES ]
Displ 0.00287 || 0.00180 [ NO ] 0.00287 || 0.00180 [ YES ]
```

```
Atomic Coordinates (Angstroms)
Type X Y Z
```

|   |           |           |          |
|---|-----------|-----------|----------|
| N | -0.760318 | 1.505950  | 1.089275 |
| C | 0.431348  | 2.342236  | 1.283959 |
| C | 0.030892  | 3.719469  | 0.731431 |
| C | -1.499408 | 3.663405  | 0.666819 |
| C | -1.756956 | 2.207647  | 0.265140 |
| C | -0.929615 | 0.394466  | 1.769865 |
| C | -1.946411 | -0.534353 | 1.696102 |



## Supporting Information

|   |           |           |           |
|---|-----------|-----------|-----------|
| C | -0.989220 | -1.691767 | -0.146907 |
| C | -2.094401 | -1.578725 | 2.781246  |
| N | -0.091419 | -0.993992 | -0.758063 |
| C | 4.044604  | -0.892593 | -0.026824 |
| C | 3.461317  | -0.078173 | -0.986247 |
| C | 2.092453  | -0.124545 | -1.199920 |
| C | 1.291958  | -0.983061 | -0.462897 |
| C | 1.878796  | -1.796171 | 0.503735  |
| C | 3.238758  | -1.749490 | 0.717569  |
| O | 5.358750  | -0.924724 | 0.258263  |
| C | 6.246550  | -0.109044 | -0.456181 |
| C | -1.573819 | 2.055129  | -1.278918 |
| O | -2.423080 | 2.630451  | -1.922010 |
| O | -0.567092 | 1.421872  | -1.669263 |
| C | -2.360479 | -1.774781 | -0.753407 |
| O | -3.019399 | -2.799978 | -0.251706 |
| O | -2.760718 | -1.043174 | -1.589273 |
| C | -4.338323 | -3.011041 | -0.744615 |
| H | 1.276609  | 1.920184  | 0.757812  |
| H | 0.669118  | 2.384877  | 2.341657  |
| H | 0.402567  | 4.524402  | 1.354477  |
| H | 0.437048  | 3.849549  | -0.263472 |
| H | -1.928433 | 3.863922  | 1.645154  |
| H | -1.926916 | 4.348694  | -0.049113 |
| H | -2.751324 | 1.879382  | 0.530172  |
| H | -0.104136 | 0.162779  | 2.424735  |
| H | -2.495639 | -2.507787 | 2.388996  |
| H | -1.137967 | -1.803437 | 3.246788  |
| H | -2.767853 | -1.253267 | 3.571197  |
| H | -0.411589 | -0.180054 | -1.322118 |
| H | 4.050010  | 0.597205  | -1.575212 |
| H | 1.636749  | 0.521299  | -1.926009 |
| H | 1.294391  | -2.474158 | 1.097230  |
| H | 3.699370  | -2.374604 | 1.459174  |
| H | 6.230460  | -0.341194 | -1.515401 |
| H | 6.019603  | 0.941885  | -0.313406 |
| H | 7.229107  | -0.317119 | -0.061180 |
| H | -0.706590 | -2.495224 | 0.498603  |
| H | -2.851288 | -0.240909 | 1.192499  |
| H | -4.707050 | -3.880019 | -0.224559 |
| H | -4.956491 | -2.150949 | -0.534860 |
| H | -4.313554 | -3.186401 | -1.809445 |

### Statistical Thermodynamic Analysis

Temperature= 298.150 Kelvin      Pressure= 1.00000 Atm

SCF Energy= -1178.72252053      Predicted Change= -1.336334D-08  
 Zero-point correction (ZPE)= -1178.2857      0.43678  
 Internal Energy (U)= -1178.2620      0.46044  
 Enthalpy (H)= -1178.2611      0.46139  
 Gibbs Free Energy (G)= -1178.3409      0.38161

Frequencies -- -323.4870      27.5171      28.9670

Supporting Information: s-Cis-Si-3D-(Methyl-Syn)-(Esther-Anti)2.output

Using Gaussian 03: IA32L-G03RevC.02 12-Jun-2004

# opt=(calcfc,ts,maxcycle=150,noeigentest) freq=noraman hf/6-31g(d)  
 geom=check guess=read scf=(direct,tight,maxcycle=300)  
 #N Geom=AllCheck Guess=Read SCRF=Check GenChk RHF/6-31G(d) Freq

Pointgroup= C1    Stoichiometry= C18H24N2O5    C1[X(C18H24N2O5)]    #Atoms= 49  
 Charge = 0      Multiplicity = 1

SCF Energy= -1178.71969856    Predicted Change= -5.136462D-09

Optimization completed.      {Found      2      times}  
 Item    Max Val.    Criteria    Pass?    RMS Val.    Criteria    Pass?  
 Force    0.00004 || 0.00045 [ YES ]    0.00000 || 0.00030 [ YES ]  
 Displ    0.00103 || 0.00180 [ YES ]    0.00103 || 0.00180 [ YES ]

| Atomic Type | Coordinates (Angstroms) |           |           |
|-------------|-------------------------|-----------|-----------|
|             | X                       | Y         | Z         |
| N           | -0.415185               | 1.761291  | 0.873615  |
| C           | 0.848190                | 2.366391  | 1.311578  |
| C           | 0.723406                | 3.853669  | 0.921575  |
| C           | -0.582184               | 3.952254  | 0.105978  |
| C           | -0.906629               | 2.512997  | -0.297585 |
| C           | -1.066485               | 0.889708  | 1.613629  |
| C           | -2.281344               | 0.268212  | 1.404787  |
| C           | -1.511528               | -1.473371 | -0.007249 |
| C           | -2.961769               | -0.400221 | 2.583307  |
| N           | -0.485318               | -1.112265 | -0.702653 |
| C           | 3.582505                | -1.592960 | 0.238575  |
| C           | 3.180964                | -0.815300 | -0.836602 |
| C           | 1.833364                | -0.666358 | -1.125774 |
| C           | 0.874722                | -1.288821 | -0.342182 |
| C           | 1.278735                | -2.073348 | 0.735408  |
| C           | 2.617448                | -2.220888 | 1.021854  |
| O           | 4.861124                | -1.799561 | 0.602674  |
| C           | 5.896966                | -1.209536 | -0.134643 |
| C           | -0.113989               | 2.032341  | -1.551020 |
| O           | 0.957716                | 2.579954  | -1.751184 |
| O           | -0.631146               | 1.088764  | -2.177801 |
| C           | -2.853078               | -1.490763 | -0.686929 |
| O           | -3.685490               | -2.269390 | -0.024164 |
| O           | -3.098865               | -0.928255 | -1.695308 |
| C           | -4.994126               | -2.410189 | -0.565081 |
| H           | 1.671482                | 1.896484  | 0.793129  |
| H           | 0.972007                | 2.213100  | 2.376075  |
| H           | 0.686207                | 4.483993  | 1.803192  |
| H           | 1.570501                | 4.150007  | 0.323330  |
| H           | -1.385765               | 4.342053  | 0.724300  |
| H           | -0.474505               | 4.590801  | -0.758851 |

## Supporting Information

|   |           |           |           |   |           |           |           |
|---|-----------|-----------|-----------|---|-----------|-----------|-----------|
| H | -1.960280 | 2.327396  | -0.436954 | C | -0.274398 | 3.609730  | 0.524854  |
| H | -0.523072 | 0.600348  | 2.498767  | C | -1.797973 | 3.462553  | 0.567976  |
| H | -3.564582 | -1.247420 | 2.277941  | C | -1.999304 | 1.949430  | 0.415339  |
| H | -2.232447 | -0.762256 | 3.303623  | C | -0.864575 | 0.295764  | 1.884598  |
| H | -3.621486 | 0.284857  | 3.111931  | C | -1.776216 | -0.737377 | 1.869110  |
| H | -0.653017 | -0.432061 | -1.464387 | C | -0.790109 | -1.883133 | 0.059164  |
| H | 3.893238  | -0.310358 | -1.458370 | C | -1.768603 | -1.784405 | 2.961360  |
| H | 1.530382  | -0.043951 | -1.946438 | N | 0.002817  | -1.145974 | -0.653687 |
| H | 0.567077  | -2.585621 | 1.355767  | C | 4.134854  | -0.562468 | -0.156706 |
| H | 2.938578  | -2.825961 | 1.848752  | C | 3.385408  | 0.265385  | -0.978288 |
| H | 5.893501  | -1.551971 | -1.163599 | C | 2.020694  | 0.058550  | -1.116785 |
| H | 5.829335  | -0.127434 | -0.114607 | C | 1.391947  | -0.974328 | -0.441337 |
| H | 6.816066  | -1.517828 | 0.339925  | C | 2.147806  | -1.809943 | 0.377782  |
| H | -1.398280 | -2.127543 | 0.829604  | C | 3.501118  | -1.601294 | 0.520653  |
| H | -2.924886 | 0.682492  | 0.647822  | O | 5.459089  | -0.447803 | 0.049047  |
| H | -5.513973 | -3.078573 | 0.101683  | C | 6.184178  | 0.547840  | -0.619145 |
| H | -5.487597 | -1.450431 | -0.601853 | C | -1.994259 | 1.566169  | -1.092289 |
| H | -4.942665 | -2.828298 | -1.559011 | O | -3.071942 | 1.708568  | -1.639724 |

### Statistical Thermodynamic Analysis

Temperature= 298.150 Kelvin Pressure= 1.00000 Atm

SCF Energy= -1178.71969856 Predicted Change= -5.136462D-09  
 Zero-point correction (ZPE)= -1178.2823 0.43730  
 Internal Energy (U)= -1178.2587 0.46099  
 Enthalpy (H)= -1178.2577 0.46193  
 Gibbs Free Energy (G)= -1178.3378 0.38186

Frequencies -- -339.4115 22.9344 27.9273

Supporting Information: s-Cis-Si-3D-(Methyl-Syn)-(Esther-Syn).output

Using Gaussian 03: AL64T-G03RevC.01 3-Apr-2004

#hf/6-31G\* scf=(direct,tight,maxcycle=300)  
 opt=(gdiis,calcf,maxcycle=150,ts,noeigentest) freq=norman  
 #N Geom=AllCheck Guess=Read SCRF=Check GenChk RHF/6-31G(d) Freq

Pointgroup= C1 Stoichiometry= C18H24N2O5 C1[X(C18H24N2O5)] #Atoms= 49  
 Charge = 0 Multiplicity = 1

SCF Energy= -1178.73199827 Predicted Change= -2.461299D-09

| Item  | Max Val. | Criteria | Pass?   | RMS Val. | Criteria | Pass?   |
|-------|----------|----------|---------|----------|----------|---------|
| Force | 0.00000  | 0.00045  | [ YES ] | 0.00000  | 0.00030  | [ YES ] |
| Displ | 0.00336  | 0.00180  | [ NO ]  | 0.00336  | 0.00180  | [ YES ] |

| Atomic Type | Coordinates (Angstroms) |          |          |
|-------------|-------------------------|----------|----------|
|             | X                       | Y        | Z        |
| N           | -0.873577               | 1.418583 | 1.197189 |
| C           | 0.228745                | 2.382598 | 1.292159 |

### Statistical Thermodynamic Analysis

Temperature= 298.150 Kelvin Pressure= 1.00000 Atm

SCF Energy= -1178.73199827 Predicted Change= -2.461299D-09  
 Zero-point correction (ZPE)= -1178.2944 0.43753

## Supporting Information

```
Internal Energy (U)=      -1178.2709      0.46107
Enthalpy (H)=            -1178.2699      0.46201
Gibbs Free Energy (G)=   -1178.3492      0.38279
```

```
-----
Frequencies --  -327.8982          15.3882          31.0796
```

Supporting Information: s-Cis-Si-3D-(Methyl-Syn)-(Esther-Syn)2.output

Using Gaussian 03: IA32L-G03RevC.02 12-Jun-2004

```
=====
# hf/6-31g(d) scf=(direct,maxcycle=300,tight)
opt=(gdiis,maxcycle=250,calcfc,ts,noeigentest) freq=noraman
geom=connectivity
#N Geom=AllCheck Guess=Read SCRF=Check GenChk RHF/6-31G(d) Freq

Pointgroup= C1  Stoichiometry= C18H24N2O5  C1[X(C18H24N2O5)]  #Atoms= 49
Charge = 0      Multiplicity = 1

-----
SCF Energy= -1178.72425683  Predicted Change= -7.558432D-09
```

```
-----
Optimization completed.      {Found      1      times}
Item  Max Val.  Criteria  Pass?      RMS Val.  Criteria  Pass?
Force  0.00000  || 0.00045  [ YES ]    0.00000  || 0.00030  [ YES ]
Displ  0.00182  || 0.00180  [ NO ]     0.00182  || 0.00180  [ YES ]
```

| Atomic Type | Coordinates (Angstroms) |           |           |
|-------------|-------------------------|-----------|-----------|
|             | X                       | Y         | Z         |
| N           | -0.600339               | 1.741333  | 0.940976  |
| C           | 0.646564                | 2.438473  | 1.272898  |
| C           | 0.458802                | 3.869713  | 0.729934  |
| C           | -0.921399               | 3.866832  | 0.046413  |
| C           | -1.226078               | 2.393611  | -0.224349 |
| C           | -1.124759               | 0.826682  | 1.732786  |
| C           | -2.272841               | 0.079004  | 1.589078  |
| C           | -1.337815               | -1.693108 | 0.302900  |
| C           | -2.866052               | -0.599644 | 2.807081  |
| N           | -0.413965               | -1.283613 | -0.504055 |
| C           | 3.740404                | -1.271731 | 0.136353  |
| C           | 3.169587                | -0.512996 | -0.873201 |
| C           | 1.795740                | -0.525134 | -1.064882 |
| C           | 0.981765                | -1.290538 | -0.246631 |
| C           | 1.556946                | -2.064214 | 0.759032  |
| C           | 2.919710                | -2.049178 | 0.950558  |
| O           | 5.057209                | -1.327497 | 0.405124  |
| C           | 5.957603                | -0.590926 | -0.376787 |
| C           | -0.550420               | 1.839284  | -1.510278 |
| O           | 0.479704                | 2.393241  | -1.861833 |
| O           | -1.093833               | 0.831317  | -2.000529 |
| C           | -2.719288               | -1.995324 | -0.205869 |
| O           | -2.990150               | -1.397471 | -1.328703 |
| O           | -3.426834               | -2.752352 | 0.376555  |
| C           | -4.258740               | -1.631232 | -1.925685 |

```
H      1.480498      1.944618      0.792974
H      0.798670      2.409529      2.344955
H      0.504996      4.599483      1.530435
H      1.232768      4.096004      0.013904
H     -1.675826      4.271199      0.715292
H     -0.924832      4.447431     -0.865082
H     -2.281965      2.170561     -0.239204
H     -0.523605      0.629043      2.606119
H     -3.394524     -1.508671      2.545647
H     -2.093351     -0.861299      3.525908
H     -3.576264      0.045160      3.320487
H     -0.716922     -0.683912     -1.285285
H      3.767075      0.099408     -1.518922
H      1.366447      0.085025     -1.837192
H      0.960467     -2.697949      1.388689
H      3.372671     -2.644348      1.720930
H      5.919586     -0.897327     -1.416334
H      5.762070      0.473474     -0.307298
H      6.939427     -0.799216      0.020159
H     -1.081907     -2.233653      1.188209
H     -2.960086      0.371656      0.813805
H     -4.266287     -1.029910     -2.818711
H     -4.368957     -2.678383     -2.165866
H     -5.047171     -1.327313     -1.253086
```

```
-----
Statistical Thermodynamic Analysis
Temperature= 298.150 Kelvin  Pressure= 1.00000 Atm
-----
SCF Energy=      -1178.72425683      Predicted Change= -7.558432D-09
Zero-point correction (ZPE)=      -1178.2868      0.43744
Internal Energy (U)=      -1178.2630      0.46118
Enthalpy (H)=      -1178.2621      0.46213
Gibbs Free Energy (G)=      -1178.3423      0.38188

-----
Frequencies --  -318.9165          19.6659          24.3034
```

Supporting Information: s-Cis-Si-3U-(Methyl-Anti)-(Esther-Anti).output

Using Gaussian 03: IA32L-G03RevC.02 12-Jun-2004

```
=====
# opt=(calcfc,ts,maxcycle=150,noeigentest) freq=noraman hf/6-31g(d)
geom=connectivity scf=(direct,tight,maxcycle=300)
#N Geom=AllCheck Guess=Read SCRF=Check GenChk RHF/6-31G(d) Freq

Pointgroup= C1  Stoichiometry= C18H24N2O5  C1[X(C18H24N2O5)]  #Atoms= 49
Charge = 0      Multiplicity = 1

-----
SCF Energy= -1178.72375123  Predicted Change= -4.159150D-08
```

```
-----
Optimization completed.      {Found      1      times}
Item  Max Val.  Criteria  Pass?      RMS Val.  Criteria  Pass?
Force  0.00001  || 0.00045  [ YES ]    0.00000  || 0.00030  [ YES ]
Displ  0.00334  || 0.00180  [ NO ]     0.00334  || 0.00180  [ YES ]
```

## Supporting Information

| Atomic Type | Coordinates (Angstroms) |           |           |
|-------------|-------------------------|-----------|-----------|
|             | X                       | Y         | Z         |
| N           | -0.563982               | 1.815911  | 0.874958  |
| C           | 0.562483                | 2.737417  | 0.770694  |
| C           | -0.117457               | 4.069163  | 0.476614  |
| C           | -1.281731               | 3.653310  | -0.427854 |
| C           | -1.735366               | 2.287104  | 0.109161  |
| C           | -0.552713               | 0.749973  | 1.656782  |
| C           | -1.527091               | -0.211548 | 1.797449  |
| C           | -0.928231               | -1.653041 | 0.038021  |
| C           | -1.480975               | -1.143516 | 2.989315  |
| N           | -0.088610               | -1.120728 | -0.797097 |
| C           | 4.042925                | -0.531241 | -0.372893 |
| C           | 3.301950                | 0.160387  | -1.331793 |
| C           | 1.947835                | -0.038529 | -1.446782 |
| C           | 1.295883                | -0.943445 | -0.606054 |
| C           | 2.028233                | -1.630322 | 0.341897  |
| C           | 3.398476                | -1.424918 | 0.464532  |
| O           | 5.360883                | -0.261267 | -0.340791 |
| C           | 6.188576                | -0.936086 | 0.564553  |
| C           | -2.095107               | 1.270960  | -1.004790 |
| O           | -3.169148               | 0.696327  | -0.879213 |
| O           | -1.212903               | 1.100616  | -1.865318 |
| C           | -2.293672               | -2.000113 | -0.537761 |
| O           | -3.224175               | -2.129839 | 0.369383  |
| O           | -2.400050               | -2.243592 | -1.688776 |
| C           | -4.553706               | -2.294512 | -0.121794 |
| H           | 1.212395                | 2.442665  | -0.046285 |
| H           | 1.140281                | 2.735648  | 1.687156  |
| H           | -0.483091               | 4.507213  | 1.400588  |
| H           | 0.551864                | 4.780680  | 0.007308  |
| H           | -2.093916               | 4.369859  | -0.426141 |
| H           | -0.936144               | 3.530579  | -1.445539 |
| H           | -2.572749               | 2.375543  | 0.790390  |
| H           | 0.363665                | 0.629485  | 2.212025  |
| H           | -1.908832               | -2.113358 | 2.755346  |
| H           | -0.461607               | -1.302936 | 3.335083  |
| H           | -2.047527               | -0.751783 | 3.830967  |
| H           | -0.506874               | -0.544293 | -1.527809 |
| H           | 3.812655                | 0.851472  | -1.975612 |
| H           | 1.373794                | 0.509319  | -2.171082 |
| H           | 1.564005                | -2.348693 | 0.991731  |
| H           | 3.936969                | -1.978018 | 1.208738  |
| H           | 5.905386                | -0.727471 | 1.590975  |
| H           | 6.168525                | -2.007409 | 0.395424  |
| H           | 7.187986                | -0.567678 | 0.390921  |
| H           | -0.569455               | -2.276527 | 0.828902  |
| H           | -2.491581               | -0.011415 | 1.373247  |
| H           | -5.181998               | -2.315467 | 0.753984  |
| H           | -4.798637               | -1.456345 | -0.753967 |
| H           | -4.635692               | -3.221582 | -0.669433 |

| Statistical Thermodynamic Analysis                                    |                         |                                 |            |                   |            |         |
|-----------------------------------------------------------------------|-------------------------|---------------------------------|------------|-------------------|------------|---------|
| Temperature= 298.150 Kelvin                                           |                         | Pressure= 1.00000 Atm           |            |                   |            |         |
| SCF Energy=                                                           | -1178.72375123          | Predicted Change= -4.1591500-08 |            |                   |            |         |
| Zero-point correction (ZPE)=                                          | -1178.2861              | 0.43764                         |            |                   |            |         |
| Internal Energy (U)=                                                  |                         | -1178.2626                      | 0.46112    |                   |            |         |
| Enthalpy (H)=                                                         |                         | -1178.2616                      | 0.46206    |                   |            |         |
| Gibbs Free Energy (G)=                                                |                         | -1178.3403                      | 0.38340    |                   |            |         |
| -----                                                                 |                         |                                 |            |                   |            |         |
| Frequencies --                                                        | -383.9040               | 22.1556                         | 39.3927    |                   |            |         |
| Supporting Information: s-Cis-Si-3U-(Methyl-Anti)-(Esther-Syn).output |                         |                                 |            |                   |            |         |
| -----                                                                 |                         |                                 |            |                   |            |         |
| Using Gaussian 03: IA32L-G03RevC.02 12-Jun-2004                       |                         |                                 |            |                   |            |         |
| -----                                                                 |                         |                                 |            |                   |            |         |
| # opt=(calcfrc,ts,maxcycle=150,noeigentest) freq=noraman hf/6-31g(d)  |                         |                                 |            |                   |            |         |
| geom=check guess=read scf=(direct,tight,maxcycle=300)                 |                         |                                 |            |                   |            |         |
| #N Geom=AllCheck Guess=Read SCRF=Check GenChk RHF/6-31G(d) Freq       |                         |                                 |            |                   |            |         |
| -----                                                                 |                         |                                 |            |                   |            |         |
| Pointgroup=                                                           | C1                      | Stoichiometry=                  | C18H24N2O5 | C1[X(C18H24N2O5)] | #Atoms= 49 |         |
| Charge =                                                              | 0                       | Multiplicity =                  | 1          |                   |            |         |
| -----                                                                 |                         |                                 |            |                   |            |         |
| SCF Energy=                                                           | -1178.72974093          | Predicted Change= -8.129503D-10 |            |                   |            |         |
| -----                                                                 |                         |                                 |            |                   |            |         |
| Optimization completed. {Found 2 times}                               |                         |                                 |            |                   |            |         |
| Item                                                                  | Max Val.                | Criteria                        | Pass?      | RMS Val.          | Criteria   | Pass?   |
| Force                                                                 | 0.00000                 | 0.00045                         | [ YES ]    | 0.00000           | 0.00030    | [ YES ] |
| Displ                                                                 | 0.00062                 | 0.00180                         | [ YES ]    | 0.00062           | 0.00180    | [ YES ] |
| -----                                                                 |                         |                                 |            |                   |            |         |
| Atomic Type                                                           | Coordinates (Angstroms) |                                 |            |                   |            |         |
|                                                                       | X                       | Y                               | Z          |                   |            |         |
| N                                                                     | -0.765186               | 1.676164                        | 0.950532   |                   |            |         |
| C                                                                     | 0.327781                | 2.644136                        | 0.946109   |                   |            |         |
| C                                                                     | -0.392696               | 3.965609                        | 0.708298   |                   |            |         |
| C                                                                     | -1.495002               | 3.564823                        | -0.275656  |                   |            |         |
| C                                                                     | -1.911414               | 2.141214                        | 0.145721   |                   |            |         |
| C                                                                     | -0.790413               | 0.638361                        | 1.763068   |                   |            |         |
| C                                                                     | -1.738800               | -0.356546                       | 1.854297   |                   |            |         |
| C                                                                     | -0.722568               | -1.813612                       | 0.293745   |                   |            |         |
| C                                                                     | -1.805071               | -1.216131                       | 3.099246   |                   |            |         |
| N                                                                     | -0.009536               | -1.197124                       | -0.597906  |                   |            |         |
| C                                                                     | 4.088700                | -0.288669                       | -0.451904  |                   |            |         |
| C                                                                     | 3.217355                | 0.413099                        | -1.284847  |                   |            |         |
| C                                                                     | 1.876569                | 0.112885                        | -1.310610  |                   |            |         |
| C                                                                     | 1.371725                | -0.906377                       | -0.500634  |                   |            |         |
| C                                                                     | 2.235423                | -1.612906                       | 0.313185   |                   |            |         |
| C                                                                     | 3.590238                | -1.302794                       | 0.347919   |                   |            |         |
| O                                                                     | 5.379457                | 0.088010                        | -0.498824  |                   |            |         |
| C                                                                     | 6.330776                | -0.584172                       | 0.278136   |                   |            |         |
| C                                                                     | -2.214863               | 1.268966                        | -1.099639  |                   |            |         |
| O                                                                     | -3.395994               | 1.059827                        | -1.310197  |                   |            |         |

## Supporting Information

|   |           |           |           |
|---|-----------|-----------|-----------|
| O | -1.213900 | 0.912845  | -1.756289 |
| C | -2.088844 | -2.337909 | -0.068787 |
| O | -2.532730 | -1.794150 | -1.155181 |
| O | -2.616580 | -3.176317 | 0.588484  |
| C | -3.874642 | -2.036542 | -1.573707 |
| H | 1.014504  | 2.423546  | 0.136915  |
| H | 0.874282  | 2.604293  | 1.880372  |
| H | -0.818602 | 4.325588  | 1.640096  |
| H | 0.266206  | 4.732796  | 0.318720  |
| H | -2.339837 | 4.241106  | -0.268726 |
| H | -1.095328 | 3.534898  | -1.281865 |
| H | -2.786650 | 2.157607  | 0.782492  |
| H | 0.076690  | 0.558751  | 2.399277  |
| H | -2.183172 | -2.206965 | 2.878203  |
| H | -0.824392 | -1.324069 | 3.557517  |
| H | -2.463852 | -0.783403 | 3.848611  |
| H | -0.527957 | -0.634124 | -1.283254 |
| H | 3.616897  | 1.193574  | -1.904775 |
| H | 1.199715  | 0.664057  | -1.936213 |
| H | 1.887978  | -2.429717 | 0.918416  |
| H | 4.232464  | -1.872826 | 0.989999  |
| H | 6.116637  | -0.487156 | 1.337330  |
| H | 6.384083  | -1.635325 | 0.015592  |
| H | 7.279289  | -0.116064 | 0.063968  |
| H | -0.247150 | -2.333684 | 1.097261  |
| H | -2.662783 | -0.206152 | 1.320633  |
| H | -4.079586 | -1.266196 | -2.293601 |
| H | -3.942703 | -3.026061 | -2.002576 |
| H | -4.541230 | -1.950080 | -0.730346 |

### Statistical Thermodynamic Analysis

Temperature= 298.150 Kelvin      Pressure= 1.00000 Atm

SCF Energy= -1178.72974093      Predicted Change= -8.129503D-10  
 Zero-point correction (ZPE)= -1178.2922      0.43753  
 Internal Energy (U)= -1178.2686      0.46113  
 Enthalpy (H)= -1178.2676      0.46207  
 Gibbs Free Energy (G)= -1178.3471      0.38262

Frequencies -- -331.5534      20.1899      30.4895

Supporting Information: s-Cis-Si-3U-(Methyl-Syn)-(Esther-Anti).output

Using Gaussian 03: Al64T-G03RevC.01 3-Apr-2004

# hf/6-31g(d) geom=connectivity scf=(direct,maxcycle=300,tight)  
 opt=(maxcycle=250,ts,calcfc,noeigentest) freq=norman  
 #N Geom=AllCheck Guess=Read SCRF=Check GenChk RHF/6-31G(d) Freq

Pointgroup= C1    Stoichiometry= C18H24N2O5    C1[X(C18H24N2O5)]    #Atoms= 49  
 Charge = 0      Multiplicity = 1

SCF Energy= -1178.72410708    Predicted Change= -1.670266D-08

```
=====
Optimization completed.      {Found      1      times}
Item      Max Val.      Criteria      Pass?      RMS Val.      Criteria      Pass?
Force      0.00001 || 0.00045 [ YES ]      0.00000 || 0.00030 [ YES ]
Displ      0.00316 || 0.00180 [ NO ]      0.00316 || 0.00180 [ YES ]
=====
```

| Atomic Type | Coordinates (Angstroms) |           |           |
|-------------|-------------------------|-----------|-----------|
|             | X                       | Y         | Z         |
| N           | -0.477105               | 1.820875  | 0.875739  |
| C           | 0.733591                | 2.632570  | 0.830975  |
| C           | 0.199946                | 4.012793  | 0.467040  |
| C           | -0.934000               | 3.682423  | -0.508774 |
| C           | -1.542184               | 2.371397  | 0.014006  |
| C           | -0.615380               | 0.775537  | 1.672503  |
| C           | -1.678471               | -0.094926 | 1.755937  |
| C           | -1.078747               | -1.625300 | 0.081929  |
| C           | -1.802884               | -0.995997 | 2.966014  |
| N           | -0.136666               | -1.193018 | -0.700854 |
| C           | 3.990653                | -0.961424 | 0.015476  |
| C           | 3.396266                | -0.232599 | -1.003658 |
| C           | 2.027729                | -0.317533 | -1.210428 |
| C           | 1.241018                | -1.131602 | -0.412876 |
| C           | 1.840208                | -1.865301 | 0.607698  |
| C           | 3.198128                | -1.775802 | 0.819957  |
| O           | 5.305172                | -0.949258 | 0.303963  |
| C           | 6.182982                | -0.190016 | -0.480570 |
| C           | -1.899958               | 1.363380  | -1.108117 |
| O           | -3.026137               | 0.885258  | -1.059563 |
| O           | -0.970541               | 1.098978  | -1.891829 |
| C           | -2.423160               | -1.869305 | -0.588873 |
| O           | -3.426589               | -1.894308 | 0.246686  |
| O           | -2.465160               | -2.132753 | -1.739703 |
| C           | -4.724914               | -1.959893 | -0.341347 |
| H           | 1.404766                | 2.259324  | 0.064539  |
| H           | 1.247885                | 2.600356  | 1.783950  |
| H           | -0.185296               | 4.503656  | 1.355769  |
| H           | 0.961487                | 4.650130  | 0.032853  |
| H           | -1.677584               | 4.467400  | -0.571672 |
| H           | -0.533696               | 3.510611  | -1.498902 |
| H           | -2.418451               | 2.544812  | 0.626345  |
| H           | 0.244612                | 0.588282  | 2.295400  |
| H           | -2.299429               | -1.929295 | 2.719819  |
| H           | -0.829729               | -1.236844 | 3.388997  |
| H           | -2.390153               | -0.533232 | 3.755770  |
| H           | -0.447642               | -0.603178 | -1.472460 |
| H           | 3.975079                | 0.404689  | -1.642881 |
| H           | 1.562557                | 0.262952  | -1.985646 |
| H           | 1.264969                | -2.522370 | 1.233104  |
| H           | 3.669700                | -2.341379 | 1.601408  |
| H           | 6.165972                | -0.511819 | -1.516157 |
| H           | 5.947169                | 0.867493  | -0.427370 |
| H           | 7.168725                | -0.354395 | -0.073090 |

## Supporting Information

```

H      -0.834645   -2.257695   0.908676
H      -2.587947   0.178871   1.257802
H      -5.416270   -1.903606   0.483902
H      -4.849151   -1.121984   -1.008198
H      -4.845412   -2.891518   -0.873922
  
```

-----  
**Statistical Thermodynamic Analysis**

Temperature= 298.150 Kelvin      Pressure= 1.00000 Atm

```

=====
SCF Energy=      -1178.72410708      Predicted Change= -1.670266D-08
Zero-point correction (ZPE)=      -1178.2864      0.43768
Internal Energy (U)=      -1178.2629      0.46116
Enthalpy (H)=      -1178.2619      0.46210
Gibbs Free Energy (G)=      -1178.3406      0.38345
  
```

```

-----
Frequencies --  -388.5692           25.0763           34.1499
  
```

Supporting Information: s-Cis-Si-3U-(Methyl-Syn)-(Esther-Syn).output

Using Gaussian 03: Al64T-G03RevC.01 3-Apr-2004

```

=====
#hf/6-31G* scf=(direct,tight,maxcycle=300)
opt=(gdiis,calcfc,maxcycle=150,ts,noeigentest) freq=norman
#N Geom=AllCheck Guess=Read SCRF=Check GenChk RHF/6-31G(d) Freq
  
```

```

-----
Pointgroup= C1    Stoichiometry= C18H24N2O5    C1[X(C18H24N2O5)]    #Atoms= 49
Charge = 0        Multiplicity = 1
  
```

```

=====
SCF Energy= -1178.73011743    Predicted Change= -6.412429D-09
  
```

```

-----
Optimization completed.            {Found        2        times}
Item    Max Val.    Criteria    Pass?    RMS Val.    Criteria    Pass?
Force   0.00001 || 0.00045 [ YES ]    0.00000 || 0.00030 [ YES ]
Displ   0.00149 || 0.00180 [ YES ]    0.00149 || 0.00180 [ YES ]
  
```

```

-----
Atomic            Coordinates (Angstroms)
Type            X            Y            Z
-----
N            -0.657293    1.668072    0.979086
C            0.530103    2.513319    1.046117
C            -0.033086    3.905240    0.786970
C            -1.112224    3.631565    -0.264367
C            -1.691471    2.249077    0.101635
C            -0.840858    0.636515    1.778262
C            -1.888746    -0.258164    1.797020
C            -0.922070    -1.802918    0.301168
C            -2.126282    -1.107827    3.027862
N            -0.087620    -1.262293    -0.533212
C            4.062539    -0.780027    -0.097729
C            3.341873    -0.010700    -0.998199
C            1.969384    -0.176965    -1.113524
C            1.305494    -1.112488    -0.338166
C            2.032863    -1.894502    0.555802
  
```

```

C            3.393342    -1.722657    0.678907
O            5.391493    -0.695763    0.095145
C            6.151775    0.194226    -0.674688
C            -1.980615    1.425818    -1.180087
O            -3.155193    1.350526    -1.492382
O            -0.971642    0.969708    -1.757802
C            -2.305692    -2.180859    -0.162673
O            -2.615485    -1.583021    -1.267445
O            -2.961384    -2.966227    0.442768
C            -3.941048    -1.687017    -1.783779
H            1.231476    2.225656    0.270986
H            1.017944    2.408365    2.007347
H            -0.472161    4.299583    1.698469
H            0.723525    4.602755    0.446862
H            -1.884820    4.388886    -0.289144
H            -0.660879    3.579048    -1.247518
H            -2.606210    2.341936    0.672630
H            -0.030106    0.467251    2.468887
H            -2.588745    -2.053947    2.773621
H            -1.194827    -1.317336    3.549157
H            -2.785617    -0.610533    3.735469
H            -0.495076    -0.648267    -1.248148
H            3.824654    0.721004    -1.615796
H            1.404146    0.431369    -1.794516
H            1.556987    -2.655157    1.146518
H            3.962715    -2.323313    1.362928
H            6.076003    -0.034249    -1.732176
H            5.849207    1.222010    -0.504965
H            7.175143    0.068519    -0.355872
H            -0.561116    -2.375439    1.128221
H            -2.755089    -0.012764    1.205034
H            -4.016588    -0.893253    -2.503518
H            -4.075143    -2.660712    -2.232811
H            -4.655036    -1.543470    -0.988246
  
```

-----  
**Statistical Thermodynamic Analysis**

Temperature= 298.150 Kelvin      Pressure= 1.00000 Atm

```

=====
SCF Energy=      -1178.73011743      Predicted Change= -6.412429D-09
Zero-point correction (ZPE)=      -1178.2925      0.43757
Internal Energy (U)=      -1178.2689      0.46117
Enthalpy (H)=      -1178.2679      0.46211
Gibbs Free Energy (G)=      -1178.3474      0.38266
  
```

```

-----
Frequencies --  -336.4616           22.4299           29.0862
  
```

### ii. Pipecolinic Acid Transition Structures.

Supporting Information: Pipecolinic-Acid-TS-s-Trans-Re.output

Using Gaussian 03: Al64T-G03RevC.01 3-Apr-2004

## Supporting Information

```

=====
# opt=(calcf, gdiis, ts, noeigentest, maxcycle=250) hf/6-31G* freq=norman
#N Geom=AllCheck Guess=Read SCRF=Check GenChk RHF/6-31G(d) Freq
-----
Pointgroup= C1 Stoichiometry= C19H26N2O5 C1[X(C19H26N2O5)] #Atoms= 52
Charge = 0 Multiplicity = 1
-----
SCF Energy= -1217.76421776 Predicted Change= -5.366109D-09
=====
Optimization completed. {Found 1 times}
Item Max Val. Criteria Pass? RMS Val. Criteria Pass?
Force 0.00001 || 0.00045 [ YES ] 0.00000 || 0.00030 [ YES ]
Displ 0.00228 || 0.00180 [ NO ] 0.00228 || 0.00180 [ YES ]
-----
Atomic Coordinates (Angstroms)
Type X Y Z
-----
C 3.290076 3.253638 0.125697
C 1.908400 3.395331 0.761495
C 1.058345 2.142795 0.540460
C 3.127047 0.754525 0.444911
C 3.980912 2.002099 0.663841
H 0.170076 2.22538 1.155163
H 2.021592 3.567182 1.830126
H 1.368845 4.233194 0.343104
H 3.191514 3.186052 -0.954599
H 3.891518 4.133187 0.334862
H 3.587720 -0.088086 0.938738
H 3.035644 0.534709 -0.609531
H 4.175251 2.120774 1.727305
H 4.940738 1.848573 0.178313
N 1.780467 0.937469 0.986092
C 0.540311 2.036420 -0.928239
O -0.113260 2.996087 -1.292482
O 0.802043 0.986690 -1.548831
C 1.130006 -0.017489 1.618269
C 1.460731 -1.344573 1.826875
H 2.457907 -1.671036 1.592851
C 0.780930 -2.128060 2.930166
H 0.758849 -3.189913 2.700143
H 1.299341 -2.027933 3.881069
H -0.243223 -1.798333 3.084073
H 0.157801 0.289626 1.967102
C 0.294692 -2.154085 -0.067351
H -0.184376 -2.833115 0.602495
C 1.572439 -2.689682 -0.646258
N -0.411601 -1.281513 -0.716571
H 0.097508 -0.599861 -1.289419
C -1.746614 -0.902683 -0.411500
C -2.567218 -1.640865 0.439994
C -2.248514 0.237864 -1.015040
C -3.855099 -1.227648 0.690085
H -2.223573 -2.544222 0.908131

```

```

C -3.547425 0.654419 -0.762183
H -1.628657 0.818493 -1.671077
C -4.358193 -0.072519 0.093525
H -4.494538 -1.789998 1.344089
H -3.894631 1.549960 -1.237757
O -5.626111 0.245613 0.407616
C -6.210408 1.394789 -0.143625
H -6.256417 1.333404 -1.225316
H -7.212985 1.440908 0.253325
H -5.669352 2.289207 0.144382
O 2.008243 -3.737445 -0.296449
O 2.076508 -1.915344 -1.566201
C 3.263563 -2.345540 -2.220566
H 3.490889 -1.573338 -2.935838
H 4.064748 -2.451853 -1.504126
H 3.092478 -3.289038 -2.716810

```

```

-----
Statistical Thermodynamic Analysis
Temperature= 298.150 Kelvin Pressure= 1.00000 Atm
-----
SCF Energy= -1217.76421776 Predicted Change= -5.366109D-09
Zero-point correction (ZPE)= -1217.2950 0.46913
Internal Energy (U)= -1217.2706 0.49360
Enthalpy (H)= -1217.2696 0.49454
Gibbs Free Energy (G)= -1217.3512 0.41295
-----
Frequencies -- -330.0387 16.0619 32.0403

```

```

Supporting Information: Pipecolonic-Acid-TS-s-Trans-Re2.output
-----
Using Gaussian 03: A164T-G03RevC.01 3-Apr-2004
-----
# opt=(calcf, ts, maxcycle=150, noeigentest) freq=norman hf/6-31g(d)
geom=connectivity scf=(direct, tight, maxcycle=300)
#N Geom=AllCheck Guess=Read SCRF=Check GenChk RHF/6-31G(d) Freq
-----
Pointgroup= C1 Stoichiometry= C19H26N2O5 C1[X(C19H26N2O5)] #Atoms= 52
Charge = 0 Multiplicity = 1
-----
SCF Energy= -1217.76278775 Predicted Change= -9.060687D-09
=====
Optimization completed. {Found 2 times}
Item Max Val. Criteria Pass? RMS Val. Criteria Pass?
Force 0.00004 || 0.00045 [ YES ] 0.00000 || 0.00030 [ YES ]
Displ 0.00179 || 0.00180 [ YES ] 0.00179 || 0.00180 [ YES ]

```

```

Atomic Coordinates (Angstroms)
Type X Y Z
-----
C 2.876590 3.665036 0.044365
C 1.542891 3.615919 0.787931
C 0.807927 2.297852 0.534357
C 2.989663 1.147100 0.178232

```

## Supporting Information

|   |           |           |           |
|---|-----------|-----------|-----------|
| C | 3.730906  | 2.458646  | 0.430023  |
| H | -0.035167 | 2.242116  | 1.211958  |
| H | 1.723128  | 3.725120  | 1.855819  |
| H | 0.890343  | 4.418556  | 0.474751  |
| H | 2.698559  | 3.662963  | -1.027656 |
| H | 3.401741  | 4.586647  | 0.277123  |
| H | 3.571431  | 0.322256  | 0.560155  |
| H | 2.826475  | 0.992919  | -0.878154 |
| H | 4.001065  | 2.523270  | 1.481892  |
| H | 4.656511  | 2.441363  | -0.138494 |
| N | 1.682352  | 1.151102  | 0.841202  |
| C | 0.194001  | 2.238209  | -0.900401 |
| O | -0.574940 | 3.148880  | -1.143884 |
| O | 0.511394  | 1.268970  | -1.617991 |
| C | 1.208738  | 0.121533  | 1.508673  |
| C | 1.704266  | -1.162322 | 1.656269  |
| H | 2.717607  | -1.359434 | 1.355252  |
| C | 1.185527  | -2.048654 | 2.768371  |
| H | 1.235354  | -3.099243 | 2.492390  |
| H | 1.763813  | -1.941448 | 3.683685  |
| H | 0.151455  | -1.820275 | 3.012364  |
| H | 0.241144  | 0.307157  | 1.945168  |
| C | 0.523907  | -2.004492 | -0.248400 |
| H | 0.142846  | -2.768002 | 0.393159  |
| C | 1.840177  | -2.290995 | -0.908479 |
| N | -0.284139 | -1.167008 | -0.809395 |
| H | 0.128142  | -0.407737 | -1.368351 |
| C | -1.639568 | -0.947751 | -0.442798 |
| C | -2.313428 | -1.741378 | 0.484217  |
| C | -2.312384 | 0.094815  | -1.057860 |
| C | -3.630486 | -1.484945 | 0.787323  |
| H | -1.831259 | -2.564236 | 0.977706  |
| C | -3.639255 | 0.354671  | -0.749869 |
| H | -1.798779 | 0.723551  | -1.759345 |
| C | -4.307218 | -0.431829 | 0.174196  |
| H | -4.157526 | -2.090368 | 1.500445  |
| H | -4.120600 | 1.180032  | -1.235269 |
| O | -5.588342 | -0.263080 | 0.544355  |
| C | -6.337846 | 0.786148  | -0.006934 |
| H | -6.432107 | 0.680544  | -1.082048 |
| H | -7.316480 | 0.724087  | 0.443955  |
| H | -5.896808 | 1.749275  | 0.223988  |
| O | 2.333321  | -1.609939 | -1.739429 |
| O | 2.327252  | -3.431337 | -0.464567 |
| C | 3.570080  | -3.854485 | -1.012314 |
| H | 3.792071  | -4.795654 | -0.536636 |
| H | 3.483174  | -3.979585 | -2.081060 |
| H | 4.339966  | -3.128953 | -0.794732 |

### Statistical Thermodynamic Analysis

Temperature= 298.150 Kelvin      Pressure= 1.00000 Atm

SCF Energy= -1217.7627875      Predicted Change= -9.060687D-09

Zero-point correction (ZPE)= -1217.2938      0.46893  
 Internal Energy (U)= -1217.2694      0.49337  
 Enthalpy (H)= -1217.2684      0.49431  
 Gibbs Free Energy (G)= -1217.3498      0.41290

Frequencies -- -306.4482      16.8712      31.1788

Supporting Information: Pipecolinic-Acid-TS-s-Trans-Si.output

Using Gaussian 03: A164T-G03RevC.01 3-Apr-2004

# opt=(gdiis,maxcycle=300,ts,calcf, noigentest) hf/6-31G\* freq=norman  
 #N Geom=AllCheck Guess=Read SCRF=Check GenChk RHF/6-31G(d) Freq

Pointgroup= C1    Stoichiometry= C19H26N2O5    C1[X(C19H26N2O5)]    #Atoms= 52  
 Charge = 0      Multiplicity = 1

SCF Energy= -1217.76570246    Predicted Change= -5.088931D-08

Optimization completed.      {Found      1      times}  
 Item    Max Val.    Criteria    Pass?    RMS Val.    Criteria    Pass?  
 Force    0.00001 || 0.00045    [ YES ]    0.00000 || 0.00030    [ YES ]  
 Displ    0.00571 || 0.00180    [ NO ]    0.00571 || 0.00180    [ YES ]

| Atomic Type | Coordinates (Angstroms) |           |           |
|-------------|-------------------------|-----------|-----------|
|             | X                       | Y         | Z         |
| C           | -0.923314               | 4.061285  | 0.873216  |
| C           | -2.207963               | 3.497875  | 0.263936  |
| C           | -1.978660               | 2.108946  | -0.335473 |
| C           | -0.131343               | 1.696027  | 1.250200  |
| C           | -0.323516               | 3.076616  | 1.879352  |
| H           | -2.930748               | 1.678285  | -0.621470 |
| H           | -2.974581               | 3.426974  | 1.034731  |
| H           | -2.573362               | 4.147505  | -0.517236 |
| H           | -0.211607               | 4.254428  | 0.076490  |
| H           | -1.123728               | 5.012295  | 1.357892  |
| H           | 0.226856                | 0.990675  | 1.983154  |
| H           | 0.596494                | 1.745610  | 0.452418  |
| H           | -0.977427               | 2.984216  | 2.743957  |
| H           | 0.638099                | 3.431172  | 2.240743  |
| N           | -1.394700               | 1.220652  | 0.686282  |
| C           | -1.132832               | 2.143372  | -1.654192 |
| O           | -1.285435               | 3.135259  | -2.333480 |
| O           | -0.420677               | 1.142604  | -1.887829 |
| C           | -2.057090               | 0.170349  | 1.128512  |
| C           | -1.607590               | -0.916344 | 1.852156  |
| H           | -0.630627               | -0.872188 | 2.301135  |
| C           | -2.589529               | -1.850756 | 2.523468  |
| H           | -2.235307               | -2.877598 | 2.519918  |
| H           | -2.758951               | -1.576844 | 3.562373  |
| H           | -3.554961               | -1.840000 | 2.026498  |
| H           | -3.069164               | 0.119378  | 0.767265  |



## Supporting Information

|   |           |           |           |
|---|-----------|-----------|-----------|
| C | -0.743390 | -1.926404 | -0.087822 |
| H | -0.385301 | -2.730669 | 0.519009  |
| C | -2.080364 | -2.148187 | -0.732363 |
| N | 0.090539  | -1.107448 | -0.636465 |
| H | -0.272467 | -0.322079 | -1.224454 |
| C | 1.472679  | -1.017244 | -0.329134 |
| C | 2.072670  | -1.717200 | 0.714867  |
| C | 2.250419  | -0.194230 | -1.127064 |
| C | 3.425961  | -1.600366 | 0.940843  |
| H | 1.501178  | -2.351843 | 1.366184  |
| C | 3.612793  | -0.074644 | -0.898390 |
| H | 1.782076  | 0.367888  | -1.912626 |
| C | 4.210704  | -0.779830 | 0.134734  |
| H | 3.896798  | -2.135925 | 1.743586  |
| H | 4.183938  | 0.572204  | -1.534648 |
| O | 5.520212  | -0.735403 | 0.439221  |
| C | 6.383967  | 0.066264  | -0.319294 |
| H | 6.104442  | 1.112526  | -0.261520 |
| H | 7.366455  | -0.063497 | 0.108167  |
| H | 6.401988  | -0.245685 | -1.357805 |
| O | -2.621645 | -1.378167 | -1.449505 |
| O | -2.538669 | -3.338274 | -0.406820 |
| C | -3.790551 | -3.720840 | -0.965879 |
| H | -3.983156 | -4.713855 | -0.594367 |
| H | -4.565368 | -3.039637 | -0.647200 |
| H | -3.731021 | -3.722047 | -2.043653 |

Force 0.00003 || 0.00045 [ YES ] 0.00000 || 0.00030 [ YES ]  
 Displ 0.00386 || 0.00180 [ NO ] 0.00386 || 0.00180 [ YES ]

| Atomic Type | Coordinates (Angstroms) |           |           |
|-------------|-------------------------|-----------|-----------|
|             | X                       | Y         | Z         |
| C           | -1.342410               | 3.802555  | 0.608515  |
| C           | -2.664163               | 3.081224  | 0.352181  |
| C           | -2.452217               | 1.597858  | 0.032187  |
| C           | -0.342093               | 1.629896  | 1.407058  |
| C           | -0.589158               | 3.100591  | 1.736509  |
| H           | -3.412533               | 1.102813  | 0.078860  |
| H           | -3.292916               | 3.167527  | 1.236232  |
| H           | -3.201521               | 3.522415  | -0.477300 |
| H           | -0.738388               | 3.800796  | -0.294131 |
| H           | -1.527962               | 4.840203  | 0.869523  |
| H           | 0.077924                | 1.129738  | 2.267513  |
| H           | 0.353735                | 1.552531  | 0.586468  |
| H           | -1.160832               | 3.174279  | 2.658955  |
| H           | 0.372178                | 3.573755  | 1.916353  |
| N           | -1.591691               | 0.955827  | 1.046282  |
| C           | -1.942917               | 1.404263  | -1.428865 |
| O           | -2.801538               | 1.579523  | -2.273019 |
| O           | -0.737893               | 1.109807  | -1.580043 |
| C           | -1.910028               | -0.250661 | 1.483743  |
| C           | -1.122337               | -1.220812 | 2.067205  |
| H           | -0.116672               | -0.965663 | 2.353938  |
| C           | -1.749607               | -2.374439 | 2.817202  |
| H           | -1.156894               | -3.280258 | 2.726738  |
| H           | -1.838990               | -2.158732 | 3.879389  |
| H           | -2.740934               | -2.604433 | 2.442822  |
| H           | -2.930390               | -0.526779 | 1.276334  |
| C           | -0.395572               | -2.066837 | 0.018806  |
| H           | 0.084970                | -2.835825 | 0.584824  |
| C           | -1.743554               | -2.464123 | -0.516276 |
| N           | 0.308137                | -1.166585 | -0.592308 |
| H           | -0.190546               | -0.443420 | -1.135011 |
| C           | 1.680908                | -0.890279 | -0.379977 |
| C           | 2.477445                | -1.597960 | 0.517064  |
| C           | 2.243631                | 0.132333  | -1.124927 |
| C           | 3.810501                | -1.283778 | 0.654658  |
| H           | 2.077376                | -2.395182 | 1.115129  |
| C           | 3.586694                | 0.449223  | -0.986443 |
| H           | 1.624953                | 0.689432  | -1.803334 |
| C           | 4.379759                | -0.258224 | -0.096633 |
| H           | 4.433122                | -1.823936 | 1.342664  |
| H           | 3.989511                | 1.246967  | -1.578724 |
| O           | 5.689004                | -0.033205 | 0.113643  |
| C           | 6.346931                | 0.972857  | -0.606532 |
| H           | 5.919505                | 1.948561  | -0.402455 |
| H           | 7.373396                | 0.957827  | -0.273569 |
| H           | 6.314311                | 0.780267  | -1.673321 |
| O           | -2.219383               | -3.520447 | -0.256789 |

### Statistical Thermodynamic Analysis

Temperature= 298.150 Kelvin Pressure= 1.00000 Atm

SCF Energy= -1217.76570246 Predicted Change= -5.088931D-08  
 Zero-point correction (ZPE)= -1217.2969 0.46872  
 Internal Energy (U)= -1217.2727 0.49294  
 Enthalpy (H)= -1217.2718 0.49388  
 Gibbs Free Energy (G)= -1217.3519 0.41374

Frequencies -- -317.0773 28.8534 32.5125

Supporting Information: Pipecolinic-Acid-TS-s-Trans-Si2.output

Using Gaussian 03: Al64T-G03RevC.01 3-Apr-2004

# opt=(calcf,ts,maxcycle=150,noeigentest) freq=noraman hf/6-31g(d)  
 geom=connectivity scf=(direct,tight,maxcycle=300)  
 #N Geom=AllCheck Guess=Read SCRF=Check GenChk RHF/6-31G(d) Freq

Pointgroup= C1 Stoichiometry= C19H26N2O5 C1[X(C19H26N2O5)] #Atoms= 52  
 Charge = 0 Multiplicity = 1

SCF Energy= -1217.76997963 Predicted Change= -5.192499D-08

Optimization completed. {Found 1 times}  
 Item Max Val. Criteria Pass? RMS Val. Criteria Pass?

## Supporting Information

```

O      -2.256758   -1.545166   -1.282048
C      -3.497611   -1.793406   -1.945015
H      -3.712023   -0.879571   -2.470904
H      -3.384668   -2.625227   -2.624144
H      -4.263504   -2.018545   -1.217368
    
```

-----  
**Statistical Thermodynamic Analysis**

Temperature= 298.150 Kelvin      Pressure= 1.00000 Atm

```

=====
SCF Energy=      -1217.76997963      Predicted Change= -5.192499D-08
Zero-point correction (ZPE)=      -1217.3006      0.46928
Internal Energy (U)=      -1217.2764      0.49356
Enthalpy (H)=      -1217.2754      0.49450
Gibbs Free Energy (G)=      -1217.3553      0.41465
    
```

```

-----
Frequencies --  -320.7281           31.3717           32.6586
    
```

Supporting Information: Pipecolinic-Acid-TS-s-Cis-Re.output

Using Gaussian 03: AL64T-G03RevC.01 3-Apr-2004

```

=====
# opt=(gdiis,maxcycle=300,ts,calcfc,noeigentest) hf/6-31G* freq=norman
#N Geom=AllCheck Guess=Read SCRF=Check GenChk RHF/6-31G(d) Freq
    
```

```

-----
Pointgroup= C1    Stoichiometry= C19H26N2O5    C1[X(C19H26N2O5)]    #Atoms= 52
Charge = 0        Multiplicity = 1
    
```

```

-----
SCF Energy= -1217.76593061    Predicted Change= -2.071789D-08
    
```

```

=====
Optimization completed.            {Found    1            times}
Item    Max Val.    Criteria    Pass?    RMS Val.    Criteria    Pass?
Force    0.00004 || 0.00045    [ YES ]    0.00000 || 0.00030    [ YES ]
Displ    0.00267 || 0.00180    [ NO ]     0.00267 || 0.00180    [ YES ]
    
```

```

-----
Atomic                    Coordinates (Angstroms)
Type                    X                    Y                    Z
-----
C                    -4.077379           -2.674330           -0.553438
C                    -2.716247           -3.018787           0.046028
C                    -1.839777           -1.779771           0.263327
C                    -3.916122           -0.403054           0.495073
C                    -4.778873           -1.648113           0.333957
H                    -1.018468           -2.082111           0.897784
H                    -2.868498           -3.512869           1.003116
H                    -2.164377           -3.697497           -0.590383
H                    -3.951554           -2.269217           -1.554596
H                    -4.681854           -3.571633           -0.647386
H                    -4.367273           0.281984           1.202082
H                    -3.825658           0.107152           -0.455787
H                    -4.978565           -2.083087           1.310606
H                    -5.735058           -1.353851           -0.089796
N                    -2.571728           -0.732038           0.976490
C                    -1.188745           -1.271638           -1.047132
    
```

```

O       -0.408649       -2.057526       -1.568385
O       -1.459831       -0.108650       -1.402829
C       -1.935582       0.157357       1.727581
C       -0.591427       0.301522       1.993703
H       0.092658       -0.460505       1.665854
C       -0.171921       1.076138       3.227332
H       -0.190039       0.462807       4.125487
H       0.844248       1.452692       3.137424
H       -0.824212       1.927921       3.399515
H       -2.587444       0.887658       2.170426
C       0.093211       1.775168       0.275777
H       0.575544       2.248291       1.104464
C       -1.183275       2.440632       -0.214287
N       0.806066       1.104867       -0.573213
H       0.265231       0.684462       -1.322346
C       2.129582       0.637103       -0.356293
C       3.091653       1.449089       0.236716
C       2.464155       -0.637425       -0.772893
C       4.366897       0.974059       0.435611
H       2.854904       2.458324       0.522743
C       3.754631       -1.113391       -0.582541
H       1.718567       -1.263879       -1.231676
C       4.708989       -0.314690       0.027485
H       5.121740       1.588497       0.888792
H       3.987698       -2.106668       -0.911695
O       5.981286       -0.682833       0.261378
C       6.421148       -1.954679       -0.129348
H       6.336887       -2.089129       -1.202142
H       7.460355       -2.013351       0.156191
H       5.866644       -2.737101       0.377081
O       -2.081042       2.743231       0.498103
O       -1.076282       2.748348       -1.477865
C       -2.243072       3.231333       -2.132016
H       -1.940586       3.435489       -3.145682
H       -3.003420       2.466209       -2.113171
H       -2.598769       4.129920       -1.650906
    
```

-----  
**Statistical Thermodynamic Analysis**

Temperature= 298.150 Kelvin      Pressure= 1.00000 Atm

```

=====
SCF Energy=      -1217.76593061      Predicted Change= -2.071789D-08
Zero-point correction (ZPE)=      -1217.2964      0.46945
Internal Energy (U)=      -1217.2721      0.49375
Enthalpy (H)=      -1217.2712      0.49470
Gibbs Free Energy (G)=      -1217.3521      0.41381
    
```

```

-----
Frequencies --  -345.0952           20.5232           30.2146
    
```

Supporting Information: Pipecolinic-Acid-TS-s-Cis-Re2-R.output

Using Gaussian 03: AL64T-G03RevC.01 3-Apr-2004

```

=====
# fopt=(calcfc,ts,maxcycle=150,noeigentest,gdiis) freq=norman hf/6-31g(d)
    
```

## Supporting Information

```
scf=(direct,tight,maxcycle=300)
#N Geom=AllCheck Guess=Read SCRF=Check GenChk RHF/6-31G(d) Freq
-----
Pointgroup= C1  Stoichiometry= C19H26N2O5  C1[X(C19H26N2O5)]  #Atoms= 52
Charge = 0      Multiplicity = 1
-----
```

```
SCF Energy= -1217.76351487  Predicted Change= -9.678852D-09
=====
```

```
Optimization completed.      {Found      2      times}
Item  Max Val.  Criteria  Pass?  RMS Val.  Criteria  Pass?
Force  0.00004 || 0.00045  [ YES ]  0.00000 || 0.00030  [ YES ]
Displ  0.00139 || 0.00180  [ YES ]  0.00139 || 0.00180  [ YES ]
-----
```

| Atomic Type | Coordinates (Angstroms) |           |           |
|-------------|-------------------------|-----------|-----------|
|             | X                       | Y         | Z         |
| C           | -3.463297               | -3.409885 | -0.097639 |
| C           | -2.313512               | -3.208810 | 0.887710  |
| C           | -1.542488               | -1.911910 | 0.615527  |
| C           | -3.613867               | -0.913541 | -0.337895 |
| C           | -4.392048               | -2.196630 | -0.068250 |
| H           | -0.874384               | -1.749062 | 1.449438  |
| H           | -2.711177               | -3.178888 | 1.900292  |
| H           | -1.605077               | -4.022958 | 0.830820  |
| H           | -3.066668               | -3.545586 | -1.100441 |
| H           | -4.014619               | -4.312191 | 0.149744  |
| H           | -4.252773               | -0.047878 | -0.212012 |
| H           | -3.230548               | -0.902087 | -1.349279 |
| H           | -4.876538               | -2.129277 | 0.903583  |
| H           | -5.176750               | -2.289102 | -0.813916 |
| N           | -2.471799               | -0.776790 | 0.572622  |
| C           | -0.633556               | -2.018246 | -0.641288 |
| O           | 0.139615                | -2.962634 | -0.623224 |
| O           | -0.743572               | -1.118577 | -1.493800 |
| C           | -2.214760               | 0.390818  | 1.126637  |
| C           | -1.058794               | 0.884986  | 1.706047  |
| H           | -0.222804               | 0.219279  | 1.831531  |
| C           | -1.161414               | 2.003314  | 2.723476  |
| H           | -1.319607               | 1.618931  | 3.728683  |
| H           | -0.254299               | 2.600657  | 2.760754  |
| H           | -1.982176               | 2.676469  | 2.498618  |
| H           | -3.048967               | 1.073774  | 1.086695  |
| C           | -0.036266               | 1.910035  | -0.152849 |
| H           | 0.438955                | 2.537272  | 0.570446  |
| C           | -1.296283               | 2.440135  | -0.774875 |
| N           | 0.668177                | 1.048607  | -0.810182 |
| H           | 0.150389                | 0.382469  | -1.394355 |
| C           | 2.008017                | 0.692441  | -0.490950 |
| C           | 2.909051                | 1.638881  | -0.007745 |
| C           | 2.430164                | -0.606958 | -0.707214 |
| C           | 4.200835                | 1.276046  | 0.292309  |
| H           | 2.617249                | 2.666716  | 0.112542  |
| C           | 3.736366                | -0.970981 | -0.409824 |

|   |           |           |           |
|---|-----------|-----------|-----------|
| H | 1.753392  | -1.348700 | -1.087999 |
| C | 4.625366  | -0.037654 | 0.097506  |
| H | 4.905239  | 1.996860  | 0.662507  |
| H | 4.028742  | -1.988594 | -0.576723 |
| O | 5.906024  | -0.292732 | 0.419624  |
| C | 6.421820  | -1.584322 | 0.244982  |
| H | 6.384595  | -1.886565 | -0.795769 |
| H | 7.451207  | -1.542009 | 0.566970  |
| H | 5.886921  | -2.308030 | 0.849890  |
| O | -1.831345 | 1.962865  | -1.714311 |
| O | -1.678601 | 3.540847  | -0.157724 |
| C | -2.831645 | 4.196030  | -0.671100 |
| H | -2.972610 | 5.065918  | -0.050702 |
| H | -2.670113 | 4.484297  | -1.698917 |
| H | -3.691330 | 3.544935  | -0.611400 |

```
-----
Statistical Thermodynamic Analysis
Temperature= 298.150 Kelvin  Pressure= 1.00000 Atm
-----
SCF Energy= -1217.76351487  Predicted Change= -9.678852D-09
Zero-point correction (ZPE)= -1217.2946  0.46885
Internal Energy (U)= -1217.2702  0.49326
Enthalpy (H)= -1217.2693  0.49420
Gibbs Free Energy (G)= -1217.3504  0.41306
-----
Frequencies -- -319.4486  20.5595  31.1478
-----
```

```
Supporting Information: Pipecolinic-Acid-TS-s-Cis-Si.output
-----
Using Gaussian 03: AL64T-G03RevC.01 3-Apr-2004
-----
```

```
# opt=(gdiis,maxcycle=300,ts,calcfc,noeigentest) hf/6-31G* freq=norman
#N Geom=AllCheck Guess=Read SCRF=Check GenChk RHF/6-31G(d) Freq
-----
Pointgroup= C1  Stoichiometry= C19H26N2O5  C1[X(C19H26N2O5)]  #Atoms= 52
Charge = 0      Multiplicity = 1
-----
```

```
SCF Energy= -1217.76936200  Predicted Change= -8.067874D-09
=====
```

```
Optimization completed.      {Found      2      times}
Item  Max Val.  Criteria  Pass?  RMS Val.  Criteria  Pass?
Force  0.00001 || 0.00045  [ YES ]  0.00000 || 0.00030  [ YES ]
Displ  0.00179 || 0.00180  [ YES ]  0.00179 || 0.00180  [ YES ]
-----
```

| Atomic Type | Coordinates (Angstroms) |          |          |
|-------------|-------------------------|----------|----------|
|             | X                       | Y        | Z        |
| C           | -1.793376               | 3.868424 | 0.350005 |
| C           | -2.808213               | 2.732285 | 0.474883 |
| C           | -2.190003               | 1.366961 | 0.142864 |
| C           | 0.024240                | 2.216570 | 0.870339 |
| C           | -0.566740               | 3.580636 | 1.216576 |
| H           | -2.906906               | 0.608810 | 0.412837 |

## Supporting Information

|   |           |           |           |
|---|-----------|-----------|-----------|
| H | -3.191659 | 2.705568  | 1.493279  |
| H | -3.644074 | 2.884230  | -0.192915 |
| H | -1.491134 | 3.974364  | -0.688692 |
| H | -2.248972 | 4.809315  | 0.643815  |
| H | 0.843406  | 1.969879  | 1.533494  |
| H | 0.398900  | 2.217748  | -0.143358 |
| H | -0.844759 | 3.598786  | 2.268336  |
| H | 0.197108  | 4.339833  | 1.072207  |
| N | -0.987326 | 1.161142  | 0.967024  |
| C | -1.958828 | 1.188479  | -1.393850 |
| O | -2.963615 | 1.361967  | -2.057181 |
| O | -0.812897 | 0.868300  | -1.772010 |
| C | -0.817423 | 0.146538  | 1.794594  |
| C | -1.558226 | -1.005328 | 1.950601  |
| H | -2.556551 | -1.032121 | 1.553964  |
| C | -1.307458 | -1.928036 | 3.122490  |
| H | -1.947003 | -1.694861 | 3.970779  |
| H | -1.507623 | -2.961607 | 2.854832  |
| H | -0.278193 | -1.867006 | 3.467247  |
| H | 0.095334  | 0.207501  | 2.363773  |
| C | -0.498355 | -2.104471 | 0.121037  |
| H | -0.030814 | -2.780852 | 0.803557  |
| C | -1.855535 | -2.547789 | -0.348135 |
| N | 0.216859  | -1.303680 | -0.600473 |
| H | -0.273012 | -0.638491 | -1.222243 |
| C | 1.581268  | -0.990884 | -0.387812 |
| C | 2.344699  | -1.540992 | 0.638802  |
| C | 2.171536  | -0.095837 | -1.264916 |
| C | 3.672836  | -1.201428 | 0.772256  |
| H | 1.923477  | -2.235334 | 1.341385  |
| C | 3.508086  | 0.246049  | -1.131717 |
| H | 1.577733  | 0.345938  | -2.042561 |
| C | 4.269006  | -0.306662 | -0.112318 |
| H | 4.270032  | -1.621994 | 1.559212  |
| H | 3.932438  | 0.941679  | -1.828503 |
| O | 5.569563  | -0.043025 | 0.105339  |
| C | 6.255696  | 0.832021  | -0.747707 |
| H | 5.825489  | 1.827304  | -0.721741 |
| H | 7.270046  | 0.873768  | -0.381680 |
| H | 6.258726  | 0.466283  | -1.768653 |
| O | -2.325605 | -3.572043 | 0.026356  |
| O | -2.378297 | -1.705838 | -1.188939 |
| C | -3.659372 | -1.977450 | -1.757709 |
| H | -3.897676 | -1.093836 | -2.323036 |
| H | -3.596874 | -2.850859 | -2.389826 |
| H | -4.380373 | -2.145679 | -0.971574 |

Statistical Thermodynamic Analysis  
 Temperature= 298.150 Kelvin      Pressure= 1.00000 Atm

SCF Energy= -1217.76936200      Predicted Change= -8.067874D-09  
 Zero-point correction (ZPE)= -1217.3003      0.46904  
 Internal Energy (U)= -1217.2760      0.49331

Enthalpy (H)= -1217.2750      0.49426  
 Gibbs Free Energy (G)= -1217.3550      0.41431

Frequencies -- -309.8659      29.9834      33.3325

Supporting Information: Pipecolinic-Acid-TS-s-Cis-Si2.output

Using Gaussian 03: Al64T-G03RevC.01 3-Apr-2004

# opt=(calcfc,ts,maxcycle=150,noeigentest) freq=noraman hf/6-31g(d)  
 geom=connectivity scf=(direct,tight,maxcycle=300)  
 #N Geom=AllCheck Guess=Read SCRF=Check GenChk RHF/6-31G(d) Freq

Pointgroup= C1    Stoichiometry= C19H26N2O5    C1[X(C19H26N2O5)]    #Atoms= 52  
 Charge = 0      Multiplicity = 1

SCF Energy= -1217.76366569    Predicted Change= -8.569846D-09

| Optimization completed. |          | {Found   |         | 2        |          | times}  |  |
|-------------------------|----------|----------|---------|----------|----------|---------|--|
| Item                    | Max Val. | Criteria | Pass?   | RMS Val. | Criteria | Pass?   |  |
| Force                   | 0.00005  | 0.00045  | [ YES ] | 0.00000  | 0.00030  | [ YES ] |  |
| Displ                   | 0.00139  | 0.00180  | [ YES ] | 0.00139  | 0.00180  | [ YES ] |  |

| Atomic Type | Coordinates (Angstroms) |           |           |
|-------------|-------------------------|-----------|-----------|
|             | X                       | Y         | Z         |
| C           | -1.568110               | 4.045689  | 0.612430  |
| C           | -2.602163               | 2.931572  | 0.431951  |
| C           | -1.960071               | 1.652616  | -0.115874 |
| C           | 0.185591                | 2.262310  | 0.917761  |
| C           | -0.386661               | 3.570351  | 1.463240  |
| H           | -2.692841               | 0.860180  | -0.129213 |
| H           | -3.071324               | 2.706784  | 1.389113  |
| H           | -3.372773               | 3.245243  | -0.256511 |
| H           | -1.216592               | 4.354345  | -0.366024 |
| H           | -2.030484               | 4.913176  | 1.074224  |
| H           | 0.965843                | 1.875290  | 1.560408  |
| H           | 0.610158                | 2.407904  | -0.066251 |
| H           | -0.707240               | 3.413928  | 2.491625  |
| H           | 0.399702                | 4.320002  | 1.483528  |
| N           | -0.869839               | 1.254511  | 0.796305  |
| C           | -1.477937               | 1.797496  | -1.602256 |
| O           | -2.094731               | 2.600147  | -2.266505 |
| O           | -0.532733               | 1.054863  | -1.948984 |
| C           | -0.910681               | 0.237832  | 1.630679  |
| C           | -1.790872               | -0.825420 | 1.689782  |
| H           | -2.753778               | -0.710777 | 1.225531  |
| C           | -1.745976               | -1.778210 | 2.864470  |
| H           | -2.433322               | -1.485291 | 3.655067  |
| H           | -2.021283               | -2.785614 | 2.566336  |
| H           | -0.752057               | -1.825333 | 3.301731  |
| H           | -0.059942               | 0.191185  | 2.290285  |
| C           | -0.736145               | -1.942865 | -0.097320 |

## Supporting Information

---

---

|   |           |           |           |
|---|-----------|-----------|-----------|
| H | -0.371780 | -2.693804 | 0.570364  |
| C | -2.090052 | -2.193878 | -0.692948 |
| N | 0.090221  | -1.182045 | -0.736610 |
| H | -0.290897 | -0.430200 | -1.355867 |
| C | 1.462199  | -1.025616 | -0.424535 |
| C | 2.082992  | -1.657144 | 0.650151  |
| C | 2.213998  | -0.202853 | -1.249371 |
| C | 3.429391  | -1.473704 | 0.881210  |
| H | 1.535523  | -2.294844 | 1.318778  |
| C | 3.567160  | -0.017563 | -1.017329 |
| H | 1.730643  | 0.307526  | -2.060319 |
| C | 4.185702  | -0.654739 | 0.048849  |
| H | 3.915555  | -1.959066 | 1.706487  |
| H | 4.117064  | 0.625629  | -1.675725 |
| O | 5.489924  | -0.541913 | 0.359768  |
| C | 6.328699  | 0.251811  | -0.434051 |
| H | 6.012549  | 1.289283  | -0.428575 |
| H | 7.312942  | 0.178091  | 0.002593  |
| H | 6.363105  | -0.109512 | -1.456017 |
| O | -2.587705 | -1.523484 | -1.530262 |
| O | -2.619029 | -3.282075 | -0.171483 |
| C | -3.906978 | -3.658123 | -0.646619 |
| H | -4.160276 | -4.560977 | -0.115451 |
| H | -4.624448 | -2.879171 | -0.435308 |
| H | -3.873033 | -3.838911 | -1.710256 |

---

### Statistical Thermodynamic Analysis

Temperature= 298.150 Kelvin      Pressure= 1.00000 Atm

---

|                              |                |                   |               |
|------------------------------|----------------|-------------------|---------------|
| SCF Energy=                  | -1217.76366569 | Predicted Change= | -8.569846D-09 |
| Zero-point correction (ZPE)= | -1217.2951     |                   | 0.46853       |
| Internal Energy (U)=         |                | -1217.2708        | 0.49277       |
| Enthalpy (H)=                |                | -1217.2699        | 0.49371       |
| Gibbs Free Energy (G)=       |                | -1217.3500        | 0.41362       |

---

Frequencies -- -341.0823                      30.0428                      36.1660
